# Supplementary material for: Epigenetic Heterogeneity of B-Cell Lymphoma: DNA Methylation, Gene Expression and Chromatin States
Source: Genes (Basel). 2015 Sep 7;6(3):812–40. doi: 10.3390/genes6030812 (PMC4584331; doi:10.3390/genes6030812)
Supplement: Supplementary File 1 [file genes-06-00812-s002.xlsx]

## Sheet: Dmet Spot i
	Rank	ID	Symbol	mean expression	SD	max delta e	min delta e	% high expressed	correlation	->t.score	->p.value	Metagene	Chromosome	Description
YES1	1	ENSG00000176105	YES1	0,203009657270498	0,240305431670847	0,638496241601683	-0,184901257349445	26	0,514754713696	6,87201598546807	1,15904175146397e-10	1 x 30	NA	YES proto-oncogene 1, Src family tyrosine kinase [Source:HGNC Symbol;Acc:HGNC:12841]
RASGRF1	2	ENSG00000058335	RASGRF1	0,206105502625078	0,176723078058533	0,582987890169408	-0,184819538349389	23	0,676443753551465	10,5123049506858	0	1 x 30	15 q25	Ras protein-specific guanine nucleotide-releasing factor 1 [Source:HGNC Symbol;Acc:HGNC:9875]
EPHA3	3	ENSG00000044524	EPHA3	0,385071966446963	0,284454812223767	0,562260848590631	-0,343407693502101	50	0,561805928744968	7,77275866594166	9,9253938401489e-13	1 x 30	3 p11	EPH receptor A3 [Source:HGNC Symbol;Acc:HGNC:3387]
PROK2	4	ENSG00000163421	PROK2	0,289460278894803	0,243402704781313	0,513183718160335	-0,268174314619114	38	0,702333130680601	11,2925306442049	0	1 x 30	3 p13	prokineticin 2 [Source:HGNC Symbol;Acc:HGNC:18455]
AGTR1	5	ENSG00000144891	AGTR1	0,433987660025741	0,256999353300165	0,507053245112104	-0,40439956190544	61	0,562187630854274	7,78047878662618	9,52016243616072e-13	1 x 30	3 q24	angiotensin II receptor, type 1 [Source:HGNC Symbol;Acc:HGNC:336]
PRKCDBP	6	ENSG00000170955	PRKCDBP	0,334464990832457	0,193057843076505	0,505501882099874	-0,286713895832457	47	0,600505703928184	8,59545518203337	1,08801856413265e-14	1 x 30	11 p15	protein kinase C, delta binding protein [Source:HGNC Symbol;Acc:HGNC:9400]
IMPACT	7	ENSG00000154059	IMPACT	0,444178608282812	0,264453720679667	0,496862296855033	-0,406911399398101	60	0,687110414852474	10,8241766744551	0	1 x 30	NA	impact RWD domain protein [Source:HGNC Symbol;Acc:HGNC:20387]
MLF1	8	ENSG00000178053	MLF1	0,41155812684577	0,218972135732261	0,494159529921147	-0,38301094228562	57	0,658075967744782	10,0033313222831	0	1 x 30	3 q25	myeloid leukemia factor 1 [Source:HGNC Symbol;Acc:HGNC:7125]
ABO	9	ENSG00000175164	ABO	0,343659438330337	0,241966119872624	0,493246783098234	-0,321401511350387	46	0,758798617546393	13,3341158693039	0	1 x 30	9 q34	ABO blood group (transferase A, alpha 1-3-N-acetylgalactosaminyltransferase; transferase B, alpha 1-3-galactosyltransferase) [Source:HGNC Symbol;Acc:HGNC:79]
NTSR1	10	ENSG00000101188	NTSR1	0,401648830653919	0,23799295859012	0,488540404433801	-0,372060732533618	56	0,694365263479383	11,0438057397214	0	1 x 30	NA	neurotensin receptor 1 (high affinity) [Source:HGNC Symbol;Acc:HGNC:8039]
GALR1	11	ENSG00000166573	GALR1	0,427344446082933	0,249366813777089	0,486106614067443	-0,391294540799725	59	0,774875185335621	14,0304567107557	0	1 x 30	NA	galanin receptor 1 [Source:HGNC Symbol;Acc:HGNC:4132]
SOX2	12	ENSG00000181449	SOX2	0,488056965206578	0,340240285840835	0,47477742100896	-0,467515846326879	57	0,595743978349591	8,48956529881442	1,95399252334028e-14	1 x 30	3 q26	SRY (sex determining region Y)-box 2 [Source:HGNC Symbol;Acc:HGNC:11195]
RBP1	13	ENSG00000114115	RBP1	0,450503142110002	0,259704670716803	0,46972889272709	-0,406066878513511	59	0,674829652154508	10,4661996925503	0	1 x 30	3 q23	retinol binding protein 1, cellular [Source:HGNC Symbol;Acc:HGNC:9919]
NTRK2	14	ENSG00000148053	NTRK2	0,4962637928135	0,355306189152635	0,468705987136375	-0,473312283663124	59	0,718927851238313	11,838133281173	0	1 x 30	9 q21	neurotrophic tyrosine kinase, receptor, type 2 [Source:HGNC Symbol;Acc:HGNC:8032]
HIC2	15	ENSG00000169635	HIC2	0,302986788068762	0,172286020680296	0,464614778284621	-0,271492034033674	35	0,628936527790169	9,25904688782999	2,22044604925031e-16	1 x 30	NA	hypermethylated in cancer 2 [Source:HGNC Symbol;Acc:HGNC:18595]
BMP2	16	ENSG00000125845	BMP2	0,36015771890871	0,24817599694765	0,463915610790538	-0,338149995599186	47	0,787723026400299	14,6355021527514	0	1 x 30	NA	bone morphogenetic protein 2 [Source:HGNC Symbol;Acc:HGNC:1069]
NRG1	17	ENSG00000157168	NRG1	0,418609344013257	0,208024024348102	0,46261258142534	-0,372677982283934	60	0,684368083522353	10,7427739481139	0	1 x 30	8 p12	neuregulin 1 [Source:HGNC Symbol;Acc:HGNC:7997]
FGF3	18	ENSG00000186895	FGF3	0,395589730539186	0,247332078720901	0,459291364197656	-0,380773972234675	59	0,781914170207701	14,3561377478214	0	1 x 30	11 q13	fibroblast growth factor 3 [Source:HGNC Symbol;Acc:HGNC:3681]
MMP2	19	ENSG00000087245	MMP2	0,290902767659054	0,199321466041291	0,456797357152977	-0,26195691934953	33	0,77927168189324	14,2322768121301	0	1 x 30	16 q12	matrix metallopeptidase 2 (gelatinase A, 72kDa gelatinase, 72kDa type IV collagenase) [Source:HGNC Symbol;Acc:HGNC:7166]
ERBB4	20	ENSG00000178568	ERBB4	0,500976574406731	0,324033679970607	0,451643680229861	-0,481241977158611	63	0,826308880443325	16,7919891646227	0	1 x 30	2 q34	v-erb-b2 avian erythroblastic leukemia viral oncogene homolog 4 [Source:HGNC Symbol;Acc:HGNC:3432]
TWIST1	21	ENSG00000122691	TWIST1	0,398447608960785	0,270289619393083	0,444526341916407	-0,359600042792866	52	0,671442511566781	10,3703419148296	0	1 x 30	7 p21	twist family bHLH transcription factor 1 [Source:HGNC Symbol;Acc:HGNC:12428]
IGF2	22	ENSG00000167244	IGF2	0,419061426118332	0,208862753024589	0,430968050385428	-0,384184806556928	62	0,690879972713108	10,9375056321673	0	1 x 30	11 p15	insulin-like growth factor 2 [Source:HGNC Symbol;Acc:HGNC:5466]
ADAMTS12	23	ENSG00000151388	ADAMTS12	0,344343037413901	0,174873566312565	0,430403275117427	-0,305321262375054	49	0,650230533017448	9,79579640001707	0	1 x 30	5 p13	ADAM metallopeptidase with thrombospondin type 1 motif, 12 [Source:HGNC Symbol;Acc:HGNC:14605]
HOXB13	24	ENSG00000159184	HOXB13	0,487135936817222	0,268286176682614	0,429436210551199	-0,459804595847297	65	0,675325002739966	10,480319414343	0	1 x 30	17 q21	homeobox B13 [Source:HGNC Symbol;Acc:HGNC:5112]
MAF	25	ENSG00000178573	MAF	0,310140562547949	0,190266840552756	0,424382842464582	-0,28348486387627	46	0,668221062183632	10,2802719144411	0	1 x 30	16 q23	v-maf avian musculoaponeurotic fibrosarcoma oncogene homolog [Source:HGNC Symbol;Acc:HGNC:6776]
EGFR	26	ENSG00000146648	EGFR	0,51497704510092	0,291056892858145	0,422982089736174	-0,482489666421722	69	0,845815390015337	18,1466551533383	0	1 x 30	7 p11	epidermal growth factor receptor [Source:HGNC Symbol;Acc:HGNC:3236]
TJP1	27	ENSG00000277401	TJP1	0,516133678152166	0,316439489826923	0,418541511697458	-0,498422633832617	65	0,822966139220239	16,58059621766	0	1 x 30	NA	tight junction protein 1 [Source:HGNC Symbol;Acc:HGNC:11827]
ASCL1	28	ENSG00000139352	ASCL1	0,513003090071617	0,230451608842404	0,416527430981014	-0,455541995785903	72	0,64209514686539	9,58632354765172	0	1 x 30	12 q23	achaete-scute family bHLH transcription factor 1 [Source:HGNC Symbol;Acc:HGNC:738]
CDH1	29	ENSG00000039068	CDH1	0,524517254398948	0,27160518802782	0,413441880438145	-0,49515392901549	68	0,691907007612299	10,9686763536541	0	1 x 30	16 q22	cadherin 1, type 1, E-cadherin (epithelial) [Source:HGNC Symbol;Acc:HGNC:1748]
EPHA7	30	ENSG00000135333	EPHA7	0,477385493845836	0,236280214664631	0,405565633973712	-0,431948921026288	65	0,763615454456262	13,5362656667405	0	1 x 30	6 q16	EPH receptor A7 [Source:HGNC Symbol;Acc:HGNC:3390]
IGFBP3	31	ENSG00000146674	IGFBP3	0,523394353360327	0,222632689648043	0,404542229847693	-0,466710196204939	77	0,792804302020469	14,8882905691972	0	1 x 30	7 p12	insulin-like growth factor binding protein 3 [Source:HGNC Symbol;Acc:HGNC:5472]
WT1	32	ENSG00000184937	WT1	0,571312951868148	0,285454865125441	0,403071168056664	-0,541520464845591	74	0,783551504674837	14,4338797755878	0	1 x 30	11 p13	Wilms tumor 1 [Source:HGNC Symbol;Acc:HGNC:12796]
WNT2	33	ENSG00000105989	WNT2	0,523369060052933	0,268578550205286	0,39998781338065	-0,469336132057946	70	0,770548228206578	13,8368070749707	0	1 x 30	7 q31	wingless-type MMTV integration site family member 2 [Source:HGNC Symbol;Acc:HGNC:12780]
TFAP2C	34	ENSG00000087510	TFAP2C	0,542714235992679	0,296937744927816	0,399947877917096	-0,511219481957591	71	0,759139692886372	13,3482571848933	0	1 x 30	NA	transcription factor AP-2 gamma (activating enhancer binding protein 2 gamma) [Source:HGNC Symbol;Acc:HGNC:11744]
IGFBP2	35	ENSG00000115457	IGFBP2	0,491859259517497	0,229003020593581	0,398329975570222	-0,444624289789427	71	0,534348818485211	7,23549245575717	1,74502634564533e-11	1 x 30	2 q35	insulin-like growth factor binding protein 2, 36kDa [Source:HGNC Symbol;Acc:HGNC:5471]
EYA4	36	ENSG00000112319	EYA4	0,506289388506906	0,208233229801226	0,396486514500612	-0,45585049335653	75	0,771221309501166	13,8666153797385	0	1 x 30	6 q23	EYA transcriptional coactivator and phosphatase 4 [Source:HGNC Symbol;Acc:HGNC:3522]
ADCYAP1	37	ENSG00000141433	ADCYAP1	0,382024147239085	0,173087038889742	0,388970918049136	-0,343176581071165	57	0,773535039172812	13,9699626159623	0	1 x 30	NA	adenylate cyclase activating polypeptide 1 (pituitary) [Source:HGNC Symbol;Acc:HGNC:241]
PLXDC2	38	ENSG00000120594	PLXDC2	0,541749569285281	0,298280195032334	0,383229674073115	-0,509876811439416	67	0,796613518252891	15,0832505880819	0	1 x 30	10 p12	plexin domain containing 2 [Source:HGNC Symbol;Acc:HGNC:21013]
KDR	39	ENSG00000128052	KDR	0,542851431775463	0,252541721997859	0,382127811582933	-0,485820687871954	72	0,845335972082254	18,1105907139477	0	1 x 30	4 q12	kinase insert domain receptor (a type III receptor tyrosine kinase) [Source:HGNC Symbol;Acc:HGNC:6307]
TMEFF2	40	ENSG00000144339	TMEFF2	0,370185447870447	0,178030569812149	0,381277587505493	-0,305593451193755	51	0,756149027894527	13,2251350798725	0	1 x 30	2 q32	transmembrane protein with EGF-like and two follistatin-like domains 2 [Source:HGNC Symbol;Acc:HGNC:11867]
PDGFRA	41	ENSG00000134853	PDGFRA	0,57281491346088	0,225405719974873	0,376539282403782	-0,498936197170153	85	0,536603994169863	7,27834146712194	1,39231959295216e-11	1 x 30	4 q12	platelet-derived growth factor receptor, alpha polypeptide [Source:HGNC Symbol;Acc:HGNC:8803]
PTGS2	42	ENSG00000073756	PTGS2	0,51301831131334	0,227267814818737	0,368203614125257	-0,476968406030132	73	0,6828349377326	10,6976393239216	0	1 x 30	1 q31	prostaglandin-endoperoxide synthase 2 (prostaglandin G/H synthase and cyclooxygenase) [Source:HGNC Symbol;Acc:HGNC:9605]
FLT4	43	ENSG00000037280	FLT4	0,360236197972827	0,182806707024782	0,367823132403114	-0,331489418486611	50	0,692310508349054	10,9809575779069	0	1 x 30	5 q35	fms-related tyrosine kinase 4 [Source:HGNC Symbol;Acc:HGNC:3767]
ONECUT2	44	ENSG00000119547	ONECUT2	0,590405253306914	0,268556946411465	0,365936166241958	-0,555720657717941	77	0,7053923230567	11,3902221655288	0	1 x 30	NA	one cut homeobox 2 [Source:HGNC Symbol;Acc:HGNC:8139]
DCC	45	ENSG00000187323	DCC	0,596598565019164	0,205270665305498	0,356021689617427	-0,501772299016658	88	0,62091976115931	9,06618962460463	7,7715611723761e-16	1 x 30	NA	DCC netrin 1 receptor [Source:HGNC Symbol;Acc:HGNC:2701]
PALM2-AKAP2	46	ENSG00000157654	PALM2-AKAP2	0,521483118772335	0,220603384721243	0,347258287242703	-0,482252269361307	74	0,711554710601438	11,5908911508472	0	1 x 30	9 q31	PALM2-AKAP2 readthrough [Source:HGNC Symbol;Acc:HGNC:33529]
BDNF	47	ENSG00000176697	BDNF	0,573855931326776	0,20307234107504	0,344639787470217	-0,444900903394445	85	0,532430534564923	7,19921481370671	2,1117774196e-11	2 x 30	11 p14	brain-derived neurotrophic factor [Source:HGNC Symbol;Acc:HGNC:1033]
ISL1	48	ENSG00000016082	ISL1	0,577751285575009	0,235659509674728	0,342480749262084	-0,536745199760473	80	0,672414656532557	10,3977316595285	0	1 x 30	5 q11	ISL LIM homeobox 1 [Source:HGNC Symbol;Acc:HGNC:6132]
HOXA9	49	ENSG00000078399	HOXA9	0,571253328543944	0,202720041626914	0,329780916318211	-0,434938966363493	80	0,716045651916947	11,7405293752826	0	1 x 30	7 p15	homeobox A9 [Source:HGNC Symbol;Acc:HGNC:5109]
ETV1	50	ENSG00000006468	ETV1	0,613610400775802	0,262951271350735	0,327430504362043	-0,545152821223171	80	0,554185331647177	7,62012498437744	2,25819363208757e-12	1 x 30	7 p21	ets variant 1 [Source:HGNC Symbol;Acc:HGNC:3490]
SFRP1	51	ENSG00000104332	SFRP1	0,567918761196572	0,226867522480721	0,327046142437513	-0,513546747299329	80	0,793943328667122	14,9460851429271	0	1 x 30	8 p11	secreted frizzled-related protein 1 [Source:HGNC Symbol;Acc:HGNC:10776]
RAB32	52	ENSG00000118508	RAB32	0,577975368515028	0,231259780028137	0,32632300241229	-0,515842739398487	80	0,748985321604296	12,9379751612684	0	1 x 30	6 q24	RAB32, member RAS oncogene family [Source:HGNC Symbol;Acc:HGNC:9772]
GABRB3	53	ENSG00000166206	GABRB3	0,600555135980374	0,206633693539489	0,319676898856719	-0,487605801707191	86	0,763087740742057	13,5138593444295	0	1 x 30	15 q12	gamma-aminobutyric acid (GABA) A receptor, beta 3 [Source:HGNC Symbol;Acc:HGNC:4083]
PENK	54	ENSG00000181195	PENK	0,572955187568037	0,184977894532138	0,318796425088605	-0,449345057051746	84	0,715279094743604	11,7147791301743	0	1 x 30	8 q12	proenkephalin [Source:HGNC Symbol;Acc:HGNC:8831]
DAPK1	55	ENSG00000196730	DAPK1	0,625315541971932	0,258558419898	0,317346571937843	-0,570601141746368	81	0,782463887074898	14,3821528064843	0	1 x 30	9 q21	death-associated protein kinase 1 [Source:HGNC Symbol;Acc:HGNC:2674]
SLIT2	56	ENSG00000145147	SLIT2	0,621680011686189	0,226781703566867	0,311230859115816	-0,543252861861628	86	0,746280907083166	12,8322954637216	0	1 x 30	4 p15	slit homolog 2 (Drosophila) [Source:HGNC Symbol;Acc:HGNC:11086]
FGFR2	57	ENSG00000066468	FGFR2	0,583569138717857	0,201191485743265	0,309756229327256	-0,481010848742919	83	0,61617221652883	8,954178287444	1,4432899320127e-15	1 x 30	10 q26	fibroblast growth factor receptor 2 [Source:HGNC Symbol;Acc:HGNC:3689]
GAS7	58	ENSG00000007237	GAS7	0,663735188755225	0,253101580102233	0,303834695455302	-0,611266853454473	83	0,811509561284114	15,8951383004825	0	1 x 30	17 p13	growth arrest-specific 7 [Source:HGNC Symbol;Acc:HGNC:4169]
SLC5A8	59	ENSG00000256870	SLC5A8	0,603459063847231	0,207566527359853	0,303689295050012	-0,472414612233196	85	0,616706122181484	8,96669556389523	1,33226762955019e-15	1 x 30	12 q23	solute carrier family 5 (sodium/monocarboxylate cotransporter), member 8 [Source:HGNC Symbol;Acc:HGNC:19119]
SOX1	60	ENSG00000182968	SOX1	0,621281480331477	0,223096891871033	0,298950554505615	-0,537761857374084	83	0,784163847469559	14,4631536837509	0	1 x 30	NA	SRY (sex determining region Y)-box 1 [Source:HGNC Symbol;Acc:HGNC:11189]
CDH11	61	ENSG00000140937	CDH11	0,601219375420365	0,193913533174871	0,29840038736159	-0,451052837197307	86	0,829844649435842	17,0216842712233	0	1 x 30	16 q21	cadherin 11, type 2, OB-cadherin (osteoblast) [Source:HGNC Symbol;Acc:HGNC:1750]
SOX17	62	ENSG00000164736	SOX17	0,644796237374545	0,224468043805839	0,294638243327209	-0,55923491872417	87	0,672324957850798	10,3952003377304	0	1 x 30	8 q11	SRY (sex determining region Y)-box 17 [Source:HGNC Symbol;Acc:HGNC:18122]
MYOD1	63	ENSG00000129152	MYOD1	0,646421470366442	0,18006750906983	0,286489400435563	-0,468629576602031	91	0,706043036164301	11,411164181758	0	1 x 30	11 p15	myogenic differentiation 1 [Source:HGNC Symbol;Acc:HGNC:7611]
CTSL	64	ENSG00000135047	CTSL	0,635509730127075	0,194617902918781	0,279491422629817	-0,487741089713541	89	0,65823051230693	10,0074761376507	0	1 x 30	9 q21	cathepsin L [Source:HGNC Symbol;Acc:HGNC:2537]
TUSC3	65	ENSG00000104723	TUSC3	0,609379807110474	0,185488279260939	0,275062261999802	-0,520323565631777	87	0,683966717768228	10,7309322841213	0	1 x 30	8 p22	tumor suppressor candidate 3 [Source:HGNC Symbol;Acc:HGNC:30242]
ASCL2	66	ENSG00000183734	ASCL2	0,677331696839976	0,20322248968428	0,257343493009648	-0,495774928995364	89	0,725051050473835	12,0497274990816	0	1 x 30	11 p15	achaete-scute family bHLH transcription factor 2 [Source:HGNC Symbol;Acc:HGNC:739]
HTR1B	67	ENSG00000135312	HTR1B	0,676131220427365	0,18325134196876	0,251805362780655	-0,485307156718092	92	0,712069852060855	11,6079074424976	0	1 x 30	6 q14	5-hydroxytryptamine (serotonin) receptor 1B, G protein-coupled [Source:HGNC Symbol;Acc:HGNC:5287]
HS3ST2	68	ENSG00000122254	HS3ST2	0,605215654743155	0,160609206432609	0,244813821760605	-0,434214747073982	89	0,657617678678651	9,99105331820002	0	2 x 30	16 p12	heparan sulfate (glucosamine) 3-O-sulfotransferase 2 [Source:HGNC Symbol;Acc:HGNC:5195]
CDH13	69	ENSG00000140945	CDH13	0,725269252250165	0,218961258379722	0,231072167298707	-0,653350249362947	91	0,770843604211184	13,8498741171809	0	1 x 30	16 q23	cadherin 13 [Source:HGNC Symbol;Acc:HGNC:1753]
NEFL	70	ENSG00000277586	NEFL	0,722790008966194	0,164422584946898	0,216644471735561	-0,444712382901031	98	0,7419887402824	12,6675014119326	0	1 x 30	8 p21	neurofilament, light polypeptide [Source:HGNC Symbol;Acc:HGNC:7739]
DLK1	71	ENSG00000185559	DLK1	0,749478082982673	0,211487351397542	0,206863336566199	-0,712024141264628	92	0,74515226297398	12,7886181280166	0	1 x 30	14 q32	delta-like 1 homolog (Drosophila) [Source:HGNC Symbol;Acc:HGNC:2907]

## Sheet: Dmet Spot ii
	Rank	ID	Symbol	mean expression	SD	max delta e	min delta e	% high expressed	correlation	->t.score	->p.value	Metagene	Chromosome	Description
UBA52	1	ENSG00000221983	UBA52	0,11222058278741	0,0837038175130387	0,695338875545922	-0,0763625981006935	1	0,459071680979839	5,91436301569538	1,36696213237641e-08	22 x 29	19 p13	ubiquitin A-52 residue ribosomal protein fusion product 1 [Source:HGNC Symbol;Acc:HGNC:12458]
AHR	2	ENSG00000106546	AHR	0,117374074912554	0,174529359927793	0,671719317881932	-0,0925153255140577	11	0,434898311807357	5,52776415011298	8,43532956817938e-08	21 x 30	7 p21	aryl hydrocarbon receptor [Source:HGNC Symbol;Acc:HGNC:348]
CAV1	3	ENSG00000105974	CAV1	0,163053298584233	0,165157786701372	0,606111066766644	-0,136159767644384	14	0,316751213563251	3,8221932144446	0,000101767400907393	24 x 30	7 q31	caveolin 1, caveolae protein, 22kDa [Source:HGNC Symbol;Acc:HGNC:1527]
CDK6	4	ENSG00000105810	CDK6	0,0841162240068687	0,0996124306436141	0,593759792973081	-0,0597275099755404	4	0,460320800412997	5,93477518424789	1,23944918772878e-08	21 x 30	7 q21	cyclin-dependent kinase 6 [Source:HGNC Symbol;Acc:HGNC:1777]
FGF2	5	ENSG00000138685	FGF2	0,402738258656839	0,23500449664251	0,526792262395792	-0,319726949461351	48	0,256270579040547	3,03448728819316	0,00145330006340527	22 x 30	4 q28	fibroblast growth factor 2 (basic) [Source:HGNC Symbol;Acc:HGNC:3676]
ELK3	6	ENSG00000111145	ELK3	0,186633493017497	0,126018580104221	0,473827726506313	-0,13390299993479	8	0,354723306859765	4,3423725585734	1,39898103675984e-05	23 x 30	12 q23	ELK3, ETS-domain protein (SRF accessory protein 2) [Source:HGNC Symbol;Acc:HGNC:3325]
ERCC6	7	ENSG00000225830	ERCC6	0,220628349312916	0,118251827080783	0,461490036802372	-0,166595421317928	14	0,506037419664156	6,71511374987845	2,59084753650995e-10	23 x 30	10 q11	excision repair cross-complementation group 6 [Source:HGNC Symbol;Acc:HGNC:3438]
DHCR24	8	ENSG00000116133	DHCR24	0,276903701354891	0,138928581146971	0,441317320750372	-0,202523212883713	25	0,370323832279343	4,56296435675475	5,73313709972822e-06	24 x 30	1 p32	24-dehydrocholesterol reductase [Source:HGNC Symbol;Acc:HGNC:2859]
SEMA3B	9	ENSG00000012171	SEMA3B	0,130483416012757	0,0933230518566629	0,416085427483483	-0,0984018125290482	5	0,421679862492868	5,32271785682968	2,1528901172907e-07	23 x 30	3 p21	sema domain, immunoglobulin domain (Ig), short basic domain, secreted, (semaphorin) 3B [Source:HGNC Symbol;Acc:HGNC:10724]
PPAT	10	ENSG00000128059	PPAT	0,4603856199568	0,152831050108219	0,394495474780042	-0,377374310761311	74	0,456911187917499	5,87916261668282	1,61775378648699e-08	23 x 30	4 q12	phosphoribosyl pyrophosphate amidotransferase [Source:HGNC Symbol;Acc:HGNC:9238]
PPARG	11	ENSG00000132170	PPARG	0,382112468107317	0,147698852607565	0,388882597180904	-0,317520471430625	56	0,49563646800104	6,53151666983989	6,57031540285402e-10	23 x 30	3 p25	peroxisome proliferator-activated receptor gamma [Source:HGNC Symbol;Acc:HGNC:9236]
ARHGDIB	12	ENSG00000111348	ARHGDIB	0,252522948563571	0,125025758131086	0,302889404757231	-0,23099400119139	23	0,54240883901152	7,38964950101477	7,72604202836646e-12	24 x 30	12 p12	Rho GDP dissociation inhibitor (GDI) beta [Source:HGNC Symbol;Acc:HGNC:679]
ZNF264	13	ENSG00000083844	ZNF264	0,425336094380632	0,102573271341054	0,197123995644431	-0,267268311761584	71	0,626550282513111	9,2011426457585	4,44089209850063e-16	24 x 30	19 q13	zinc finger protein 264 [Source:HGNC Symbol;Acc:HGNC:13057]

## Sheet: Dmet Spot iii
	Rank	ID	Symbol	mean expression	SD	max delta e	min delta e	% high expressed	correlation	->t.score	->p.value	Metagene	Chromosome	Description
MET	1	ENSG00000105976	MET	0,235597822795099	0,213733228012472	0,633143583219939	-0,20984671689159	26	0,427264246421169	5,40882411677034	1,45619796443341e-07	30 x 28	7 q31	MET proto-oncogene, receptor tyrosine kinase [Source:HGNC Symbol;Acc:HGNC:7029]
RAD50	2	ENSG00000113522	RAD50	0,389989601485405	0,25594299045263	0,547969533351688	-0,35626077530746	45	0,631541240276263	9,32274687341527	2,22044604925031e-16	30 x 30	5 q31	RAD50 homolog (S. cerevisiae) [Source:HGNC Symbol;Acc:HGNC:9816]
IL16	3	ENSG00000172349	IL16	0,417324130836631	0,214168331288708	0,496126929313745	-0,347356975611067	58	0,545487034249632	7,44927931583149	5,62760948952246e-12	28 x 30	15 q25	interleukin 16 [Source:HGNC Symbol;Acc:HGNC:5980]
LIG3	4	ENSG00000005156	LIG3	0,446833553891712	0,26339415534102	0,494207351246133	-0,416860634430559	56	0,721381385999709	11,9222154208692	0	30 x 30	17 q12	ligase III, DNA, ATP-dependent [Source:HGNC Symbol;Acc:HGNC:6600]
BAX	5	ENSG00000087088	BAX	0,373506804373085	0,166508030799373	0,458568450263507	-0,292814983889376	51	0,624221439444442	9,14504211825816	4,44089209850063e-16	28 x 30	19 q13	BCL2-associated X protein [Source:HGNC Symbol;Acc:HGNC:959]
SPDEF	6	ENSG00000124664	SPDEF	0,339040301226581	0,189660493068714	0,44680363567818	-0,286876126937108	43	0,757173545029322	13,2670923325221	0	30 x 30	6 p21	SAM pointed domain containing ETS transcription factor [Source:HGNC Symbol;Acc:HGNC:17257]
AOC3	7	ENSG00000131471	AOC3	0,246637357264458	0,175622320708155	0,437915500880905	-0,207406507853431	25	0,710673890804477	11,5618832942831	0	30 x 30	17 q21	amine oxidase, copper containing 3 [Source:HGNC Symbol;Acc:HGNC:550]
PARP1	8	ENSG00000143799	PARP1	0,463208656638127	0,247363470131394	0,437825588224028	-0,395984982700784	56	0,741785698595903	12,6597927929109	0	30 x 30	1 q42	poly (ADP-ribose) polymerase 1 [Source:HGNC Symbol;Acc:HGNC:270]
AIM2	9	ENSG00000163568	AIM2	0,425875052997221	0,201400811908169	0,427390501388744	-0,362855817765391	57	0,699725926853646	11,2102486817379	0	30 x 30	1 q23	absent in melanoma 2 [Source:HGNC Symbol;Acc:HGNC:357]
IGF1	10	ENSG00000017427	IGF1	0,249488623230011	0,168891523891785	0,420105691957959	-0,22417847065357	26	0,760313842054481	13,3971375409315	0	30 x 30	12 q23	insulin-like growth factor 1 (somatomedin C) [Source:HGNC Symbol;Acc:HGNC:5464]
PADI4	11	ENSG00000159339	PADI4	0,319348661627405	0,173054263057174	0,419181068761066	-0,279670100217631	37	0,73604922013171	12,4451464885018	0	30 x 30	1 p36	peptidyl arginine deiminase, type IV [Source:HGNC Symbol;Acc:HGNC:18368]
MAP3K8	12	ENSG00000107968	MAP3K8	0,558422186535342	0,267218584753372	0,412176463840598	-0,503404159333588	69	0,605269270644381	8,70281714551759	5,99520433297585e-15	30 x 30	10 p11	mitogen-activated protein kinase kinase kinase 8 [Source:HGNC Symbol;Acc:HGNC:6860]
NOS3	13	ENSG00000164867	NOS3	0,453626751783783	0,251926205105866	0,412114972025742	-0,410073140593307	59	0,773326587199117	13,9605952159739	0	30 x 30	7 q36	nitric oxide synthase 3 (endothelial cell) [Source:HGNC Symbol;Acc:HGNC:7876]
TSC2	14	ENSG00000103197	TSC2	0,537474701667081	0,280606214006407	0,411879494197581	-0,512411085593146	71	0,340052397686818	4,13871833917249	3,10519951253196e-05	30 x 29	16 p13	tuberous sclerosis 2 [Source:HGNC Symbol;Acc:HGNC:12363]
IFNG	15	ENSG00000111537	IFNG	0,45671227781269	0,214319925008324	0,405918283089566	-0,37881898150066	64	0,800728216821935	15,2993786121166	0	30 x 30	12 q15	interferon, gamma [Source:HGNC Symbol;Acc:HGNC:5438]
PRSS1	16	ENSG00000274247	PRSS1	0,442258652468822	0,220962331567887	0,394647568959748	-0,38979031716807	57	0,824823927549157	16,697406603311	0	30 x 30	NA	protease, serine, 1 (trypsin 1) [Source:HGNC Symbol;Acc:HGNC:9475]
TIE1	17	ENSG00000066056	TIE1	0,515417064434404	0,254087454389055	0,393599819400183	-0,445967802918113	68	0,398446326530944	4,97216328312318	1,01737699864657e-06	28 x 30	1 p34	tyrosine kinase with immunoglobulin-like and EGF-like domains 1 [Source:HGNC Symbol;Acc:HGNC:11809]
CSF3R	18	ENSG00000119535	CSF3R	0,510440343457912	0,176507507371449	0,384524560176173	-0,449129742743626	78	0,550573203734903	7,54875099283136	3,31001892561744e-12	30 x 29	1 p34	colony stimulating factor 3 receptor (granulocyte) [Source:HGNC Symbol;Acc:HGNC:2439]
IL1B	19	ENSG00000125538	IL1B	0,536186824420195	0,200801211836919	0,382308894376797	-0,447880024709669	80	0,722470040982227	11,9598220072589	0	30 x 30	2 q14	interleukin 1, beta [Source:HGNC Symbol;Acc:HGNC:5992]
S100A2	20	ENSG00000196754	S100A2	0,535150038481815	0,186266872996737	0,373866845352771	-0,432591748506878	78	0,664152780628471	10,1680147401093	0	30 x 30	1 q21	S100 calcium binding protein A2 [Source:HGNC Symbol;Acc:HGNC:10492]
EPHX1	21	ENSG00000143819	EPHX1	0,436025225118039	0,205330780619331	0,373080725007274	-0,362643298549117	60	0,834476048472326	17,3325745948548	0	30 x 30	1 q42	epoxide hydrolase 1, microsomal (xenobiotic) [Source:HGNC Symbol;Acc:HGNC:3401]
MAPK4	22	ENSG00000141639	MAPK4	0,440093416844131	0,19054666283302	0,367466041489202	-0,398013032094758	59	0,747412438096593	12,8763352920591	0	30 x 30	NA	mitogen-activated protein kinase 4 [Source:HGNC Symbol;Acc:HGNC:6878]
MMP7	23	ENSG00000137673	MMP7	0,48406580783339	0,188811771960814	0,360734628131522	-0,393457877169229	74	0,548800278907901	7,51394221572085	3,98669985912647e-12	30 x 30	11 q22	matrix metallopeptidase 7 (matrilysin, uterine) [Source:HGNC Symbol;Acc:HGNC:7174]
EMR3	24	ENSG00000131355	EMR3	0,382278614594569	0,147331132690977	0,359697402322724	-0,258668484078278	56	0,731010874707788	12,261461139342	0	30 x 30	19 p13	egf-like module containing, mucin-like, hormone receptor-like 3 [Source:HGNC Symbol;Acc:HGNC:23647]
CHI3L2	25	ENSG00000064886	CHI3L2	0,564873402432397	0,219384436571744	0,358483471001187	-0,500683592958713	78	0,56520977869294	7,84186126288224	6,82898182446934e-13	30 x 30	1 p13	chitinase 3-like 2 [Source:HGNC Symbol;Acc:HGNC:1933]
HGF	26	ENSG00000019991	HGF	0,564952468017591	0,200512362053562	0,358404405415992	-0,433908016403556	81	0,432569072061338	5,49132092508029	9,97855268414227e-08	29 x 30	7 q21	hepatocyte growth factor (hepapoietin A; scatter factor) [Source:HGNC Symbol;Acc:HGNC:4893]
TFF1	27	ENSG00000160182	TFF1	0,579031058293855	0,229133031575366	0,352135024914165	-0,487009000411649	79	0,770747053598641	13,8456004278968	0	30 x 30	NA	trefoil factor 1 [Source:HGNC Symbol;Acc:HGNC:11755]
PLAT	28	ENSG00000104368	PLAT	0,46705185501891	0,181662035439217	0,345692121108909	-0,408500519137958	70	0,673688649465052	10,4337746445714	0	30 x 30	8 p11	plasminogen activator, tissue [Source:HGNC Symbol;Acc:HGNC:9051]
APOC2	29	ENSG00000234906	APOC2	0,596486365702781	0,199563707384844	0,342948114998973	-0,514672258118821	81	0,681277295597954	10,6520547164673	0	30 x 30	19 q13	apolipoprotein C-II [Source:HGNC Symbol;Acc:HGNC:609]
TMPRSS4	30	ENSG00000137648	TMPRSS4	0,586250962993282	0,170048939191227	0,338728280365114	-0,449936600812831	89	0,659122541833202	10,0314436778444	0	30 x 30	11 q23	transmembrane protease, serine 4 [Source:HGNC Symbol;Acc:HGNC:11878]
FRK	31	ENSG00000111816	FRK	0,580123634237634	0,268645231134012	0,338372084559359	-0,508204631350415	74	0,730812285708367	12,2543106456353	0	30 x 30	6 q22	fyn-related Src family tyrosine kinase [Source:HGNC Symbol;Acc:HGNC:3955]
DSG1	32	ENSG00000134760	DSG1	0,53402141756977	0,192443029625959	0,334719988445268	-0,449860074512126	79	0,858226806614835	19,1377687295296	0	30 x 30	NA	desmoglein 1 [Source:HGNC Symbol;Acc:HGNC:3048]
PGR	33	ENSG00000082175	PGR	0,572843235281314	0,189748488358662	0,332874421485603	-0,480084775430437	83	0,823879383790774	16,6378087577186	0	30 x 30	11 q22	progesterone receptor [Source:HGNC Symbol;Acc:HGNC:8910]
LMTK2	34	ENSG00000164715	LMTK2	0,425803462672235	0,179479880262831	0,327323535460597	-0,339702422412837	62	0,749491046768255	12,9578995457345	0	30 x 30	7 q21	lemur tyrosine kinase 2 [Source:HGNC Symbol;Acc:HGNC:17880]
PSCA	35	ENSG00000167653	PSCA	0,356473932294119	0,143435737996348	0,321402084685831	-0,293914306914419	49	0,794445547707416	14,9717027910188	0	30 x 30	8 q24	prostate stem cell antigen [Source:HGNC Symbol;Acc:HGNC:9500]
TDGF1	36	ENSG00000241186	TDGF1	0,439590581773296	0,135365876656969	0,320971382261791	-0,289424043550238	74	0,725926140313404	12,0804516674869	0	29 x 30	3 p21	teratocarcinoma-derived growth factor 1 [Source:HGNC Symbol;Acc:HGNC:11701]
APBA2	37	ENSG00000276495	APBA2	0,614510204649	0,207728629556662	0,31342637855902	-0,466741564235466	83	0,79196747246044	14,8460975072383	0	30 x 30	NA	amyloid beta (A4) precursor protein-binding, family A, member 2 [Source:HGNC Symbol;Acc:HGNC:579]
IL12B	38	ENSG00000113302	IL12B	0,507791671423059	0,180887635582799	0,310022285218544	-0,364497623758899	75	0,796018037851009	15,0524546441914	0	30 x 30	5 q33	interleukin 12B [Source:HGNC Symbol;Acc:HGNC:5970]
NBL1	39	ENSG00000158747	NBL1	0,625590034757505	0,217484128004381	0,305576048450515	-0,517949454572041	86	0,694751561129004	11,0556792937749	0	30 x 30	1 p36	neuroblastoma 1, DAN family BMP antagonist [Source:HGNC Symbol;Acc:HGNC:7650]
KLK11	40	ENSG00000167757	KLK11	0,470695511138024	0,195601768448993	0,302147408348192	-0,41598111091246	69	0,873158049940076	20,5026427077503	0	30 x 30	19 q13	kallikrein-related peptidase 11 [Source:HGNC Symbol;Acc:HGNC:6359]
IL2	41	ENSG00000109471	IL2	0,641496568066897	0,238301178247198	0,299544337070949	-0,585522061321283	84	0,709445159296349	11,5216010612321	0	30 x 30	4 q27	interleukin 2 [Source:HGNC Symbol;Acc:HGNC:6001]
MMP19	42	ENSG00000123342	MMP19	0,619184045263535	0,177039285524833	0,299311673533458	-0,411199500723435	93	0,770930773285724	13,8537345649948	0	30 x 30	12 q13	matrix metallopeptidase 19 [Source:HGNC Symbol;Acc:HGNC:7165]
SPI1	43	ENSG00000066336	SPI1	0,431866826178859	0,132532293750123	0,292368547568008	-0,292062601079861	71	0,715279739213943	11,7148007428218	0	29 x 30	11 p11	Spi-1 proto-oncogene [Source:HGNC Symbol;Acc:HGNC:11241]
PLAGL1	44	ENSG00000118495	PLAGL1	0,643461782638335	0,186130074484797	0,286068738414297	-0,557360742378936	89	0,487272143454972	6,38658289508499	1,3580430113791e-09	28 x 30	6 q24	pleiomorphic adenoma gene-like 1 [Source:HGNC Symbol;Acc:HGNC:9046]
B3GALT5	45	ENSG00000183778	B3GALT5	0,59895648924634	0,18853306258005	0,280647578172207	-0,463708824861628	87	0,684683669212216	10,7520977032849	0	30 x 30	NA	UDP-Gal:betaGlcNAc beta 1,3-galactosyltransferase, polypeptide 5 [Source:HGNC Symbol;Acc:HGNC:920]
TRIM29	46	ENSG00000137699	TRIM29	0,624122412791886	0,197302594324526	0,280175958135432	-0,503538626191635	87	0,801594409570553	15,3456349322043	0	30 x 30	11 q23	tripartite motif containing 29 [Source:HGNC Symbol;Acc:HGNC:17274]
INS	47	ENSG00000254647	INS	0,645553301867394	0,210278487911599	0,274678732969699	-0,516598273935063	86	0,757285263778777	13,2716814048994	0	30 x 30	11 p15	insulin [Source:HGNC Symbol;Acc:HGNC:6081]
CSF2	48	ENSG00000164400	CSF2	0,646438839736211	0,229211429145918	0,273793195100882	-0,594274665446737	86	0,670404133051779	10,3411937345977	0	30 x 30	5 q31	colony stimulating factor 2 (granulocyte-macrophage) [Source:HGNC Symbol;Acc:HGNC:2434]
DMP1	49	ENSG00000152592	DMP1	0,615699512646748	0,201766065231207	0,271588968055006	-0,497125230892362	89	0,776568880212734	14,1075882103686	0	30 x 30	4 q22	dentin matrix acidic phosphoprotein 1 [Source:HGNC Symbol;Acc:HGNC:2932]
SFTPA1	50	ENSG00000122852	SFTPA1	0,634175849641962	0,192677952810221	0,271541807124955	-0,501087165694594	89	0,738771522710718	12,5462597715512	0	30 x 30	10 q22	surfactant protein A1 [Source:HGNC Symbol;Acc:HGNC:10798]
GABRG3	51	ENSG00000182256	GABRG3	0,671410830682298	0,192619961406758	0,271251283227477	-0,50321683177503	89	0,645640389159555	9,67691132815948	0	30 x 30	15 q12	gamma-aminobutyric acid (GABA) A receptor, gamma 3 [Source:HGNC Symbol;Acc:HGNC:4088]
PI3	52	ENSG00000124102	PI3	0,5889573486578	0,160699579199955	0,270874276655482	-0,442177620824467	92	0,811579995833298	15,8991797347818	0	30 x 30	NA	peptidase inhibitor 3, skin-derived [Source:HGNC Symbol;Acc:HGNC:8947]
LY6G6E	53	ENSG00000206401	LY6G6E	0,681032494163774	0,269546106325289	0,270053138793619	-0,642799001579814	84	0,641305139377178	9,56628083921608	0	30 x 30	NA	lymphocyte antigen 6 complex, locus G6E (pseudogene) [Source:HGNC Symbol;Acc:HGNC:13934]
SLC14A1	54	ENSG00000141469	SLC14A1	0,586941754132794	0,145208010029932	0,26965660138099	-0,46069413647114	91	0,802298846566423	15,3834523884726	0	30 x 30	NA	solute carrier family 14 (urea transporter), member 1 (Kidd blood group) [Source:HGNC Symbol;Acc:HGNC:10918]
MMP3	55	ENSG00000149968	MMP3	0,67743724860075	0,211373669516819	0,268565362050879	-0,489030202237342	89	0,631286374304994	9,31649093113555	2,22044604925031e-16	30 x 30	11 q22	matrix metallopeptidase 3 (stromelysin 1, progelatinase) [Source:HGNC Symbol;Acc:HGNC:7173]
HLA-DOA	56	ENSG00000204252	HLA-DOA	0,431108879831977	0,143963896576194	0,268192367862259	-0,328550589857039	67	0,766812515424537	13,6734147745599	0	29 x 30	6 p21	major histocompatibility complex, class II, DO alpha [Source:HGNC Symbol;Acc:HGNC:4936]
TRPM5	57	ENSG00000070985	TRPM5	0,613889048775435	0,200271728096608	0,260957634307272	-0,4828445971614	80	0,813797627803333	16,0274727747738	0	30 x 30	11 p15	transient receptor potential cation channel, subfamily M, member 5 [Source:HGNC Symbol;Acc:HGNC:14323]
APOC1	58	ENSG00000130208	APOC1	0,598058076759116	0,164678013492055	0,250220256574217	-0,386780866032299	89	0,913156213807431	25,6410694802676	0	30 x 30	19 q13	apolipoprotein C-I [Source:HGNC Symbol;Acc:HGNC:607]
SOD3	59	ENSG00000109610	SOD3	0,674803148952296	0,183349905839178	0,2501760944061	-0,475351447563825	90	0,615986317924072	8,94982461798282	1,55431223447522e-15	30 x 30	4 p15	superoxide dismutase 3, extracellular [Source:HGNC Symbol;Acc:HGNC:11181]
FASTK	60	ENSG00000164896	FASTK	0,40534514419824	0,122624221247551	0,246734352994743	-0,294256275025308	65	0,785049619868319	14,5056936180611	0	28 x 30	7 q36	Fas-activated serine/threonine kinase [Source:HGNC Symbol;Acc:HGNC:24676]
GFAP	61	ENSG00000131095	GFAP	0,667376374608768	0,17930699424363	0,244717400579201	-0,472317472290472	90	0,716003576930126	11,7391137336664	0	30 x 30	17 q21	glial fibrillary acidic protein [Source:HGNC Symbol;Acc:HGNC:4235]
APOA1	62	ENSG00000118137	APOA1	0,710990595888499	0,215069437393241	0,24348992127942	-0,559694800061432	91	0,739180516601782	12,561566825321	0	30 x 30	11 q23	apolipoprotein A-I [Source:HGNC Symbol;Acc:HGNC:600]
C4B	63	ENSG00000224389	C4B	0,64376558821748	0,157050308535921	0,240676480892796	-0,451523111813971	91	0,819976051033059	16,3960350251615	0	30 x 30	6 p21	complement component 4B (Chido blood group) [Source:HGNC Symbol;Acc:HGNC:1324]
WRN	64	ENSG00000165392	WRN	0,456476139278827	0,118280843484319	0,238847239380321	-0,335892352678576	78	0,759835033698785	13,3771671638773	0	27 x 30	8 p12	Werner syndrome, RecQ helicase-like [Source:HGNC Symbol;Acc:HGNC:12791]
NCL	65	ENSG00000115053	NCL	0,429930349297935	0,129259515952581	0,237465651992792	-0,294682684913223	70	0,743279615582984	12,7166924209263	0	29 x 29	2 q37	nucleolin [Source:HGNC Symbol;Acc:HGNC:7667]
ITK	66	ENSG00000113263	ITK	0,724556989886474	0,191472790618881	0,233545871391722	-0,619356487605772	95	0,471857925070348	6,12545808542594	4,92358220860467e-09	27 x 30	5 q33	IL2-inducible T-cell kinase [Source:HGNC Symbol;Acc:HGNC:6171]
SFTPC	67	ENSG00000168484	SFTPC	0,706327235649283	0,188373380028107	0,229915186781795	-0,548259453030235	94	0,690734001913193	10,9330856950481	0	30 x 30	8 p21	surfactant protein C [Source:HGNC Symbol;Acc:HGNC:10802]
S100A12	68	ENSG00000163221	S100A12	0,744872547795089	0,153270938169386	0,229511572129723	-0,599144942756242	95	0,590065245008913	8,36509428905679	3,88578058618805e-14	29 x 30	1 q21	S100 calcium binding protein A12 [Source:HGNC Symbol;Acc:HGNC:10489]
MUSK	69	ENSG00000030304	MUSK	0,686305744993018	0,166329457102988	0,228695407763874	-0,586017612391515	95	0,595270640141292	8,47911585761523	2,06501482580279e-14	29 x 30	9 q31	muscle, skeletal, receptor tyrosine kinase [Source:HGNC Symbol;Acc:HGNC:7525]
TFDP1	70	ENSG00000198176	TFDP1	0,677683420566972	0,142463194125158	0,226614950360346	-0,454606859160957	96	0,691536929599093	10,9574297429563	0	30 x 29	NA	transcription factor Dp-1 [Source:HGNC Symbol;Acc:HGNC:11749]
CPA4	71	ENSG00000128510	CPA4	0,652522981097697	0,103153310501047	0,225523478112829	-0,264995092927271	100	0,770144407327206	13,8189780689819	0	27 x 30	7 q32	carboxypeptidase A4 [Source:HGNC Symbol;Acc:HGNC:15740]
FGF1	72	ENSG00000113578	FGF1	0,659816979918782	0,184645135060458	0,224625089191494	-0,458947014606752	91	0,836105059799622	17,4447585442581	0	30 x 30	5 q31	fibroblast growth factor 1 (acidic) [Source:HGNC Symbol;Acc:HGNC:3665]
AGXT	73	ENSG00000172482	AGXT	0,730638050375591	0,184761222160462	0,223842466792328	-0,487972333291631	95	0,740376804976403	12,6065155504048	0	30 x 30	2 q37	alanine-glyoxylate aminotransferase [Source:HGNC Symbol;Acc:HGNC:341]
NDN	74	ENSG00000182636	NDN	0,682965325716406	0,153594915335333	0,221333045210912	-0,465002266936957	96	0,688388656931694	10,8624180096303	0	30 x 30	15 q11	necdin, melanoma antigen (MAGE) family member [Source:HGNC Symbol;Acc:HGNC:7675]
JAK3	75	ENSG00000105639	JAK3	0,235385104216151	0,123124281870266	0,221083915709914	-0,193304719466778	21	0,752789178247185	13,0891195490691	0	28 x 30	19 p13	Janus kinase 3 [Source:HGNC Symbol;Acc:HGNC:6193]
ACTG2	76	ENSG00000163017	ACTG2	0,683989002382262	0,206949774831581	0,220309368545056	-0,550900318434894	89	0,79513902490859	15,0072132838928	0	30 x 30	2 p13	actin, gamma 2, smooth muscle, enteric [Source:HGNC Symbol;Acc:HGNC:145]
WNT8B	77	ENSG00000075290	WNT8B	0,709233608518938	0,159558464878229	0,214123264914645	-0,559067070295881	96	0,686634809924758	10,8099966458263	0	30 x 30	10 q24	wingless-type MMTV integration site family, member 8B [Source:HGNC Symbol;Acc:HGNC:12789]
IL1RN	78	ENSG00000136689	IL1RN	0,703029163127151	0,18460012952565	0,211971989629742	-0,57941903261086	92	0,660056102915417	10,0566072958475	0	30 x 30	2 q14	interleukin 1 receptor antagonist [Source:HGNC Symbol;Acc:HGNC:6000]
CSF1R	79	ENSG00000182578	CSF1R	0,74965656405331	0,202204092372988	0,210573459756214	-0,633800437386643	92	0,628194300917519	9,24099007021063	2,22044604925031e-16	30 x 30	5 q32	colony stimulating factor 1 receptor [Source:HGNC Symbol;Acc:HGNC:2433]
DDR2	80	ENSG00000162733	DDR2	0,736023004397648	0,209249917953516	0,209979606253981	-0,701338408808676	92	0,651174148901642	9,82046443859973	0	30 x 30	1 q23	discoidin domain receptor tyrosine kinase 2 [Source:HGNC Symbol;Acc:HGNC:2731]
EGF	81	ENSG00000138798	EGF	0,697963210151035	0,136914241634979	0,209185148746207	-0,538755424712439	99	0,751328469493079	13,0307272907219	0	30 x 30	4 q25	epidermal growth factor [Source:HGNC Symbol;Acc:HGNC:3229]
EDNRB	82	ENSG00000136160	EDNRB	0,743769450123127	0,17864346242928	0,208850804513464	-0,551526973719619	96	0,702470451721433	11,2968891153536	0	30 x 30	NA	endothelin receptor type B [Source:HGNC Symbol;Acc:HGNC:3180]
TM7SF3	83	ENSG00000064115	TM7SF3	0,769338681497286	0,22968752156619	0,205045438427525	-0,663353385745407	90	0,466875686619269	6,04263004839859	7,36627692177194e-09	30 x 30	12 p11	transmembrane 7 superfamily member 3 [Source:HGNC Symbol;Acc:HGNC:23049]
AFP	84	ENSG00000081051	AFP	0,762617216180253	0,214847779241475	0,204952668030273	-0,664710207821857	92	0,625142291086268	9,16717682682914	4,44089209850063e-16	30 x 30	4 q13	alpha-fetoprotein [Source:HGNC Symbol;Acc:HGNC:317]
KRT5	85	ENSG00000186081	KRT5	0,741800449265466	0,164722014472312	0,204202161386163	-0,525431934957196	95	0,713419594152134	11,6526732783277	0	30 x 30	12 q13	keratin 5 [Source:HGNC Symbol;Acc:HGNC:6442]
SIN3B	86	ENSG00000127511	SIN3B	0,756233080005352	0,162948486371565	0,203996943804172	-0,56274455647653	98	0,632223483734187	9,33951799072802	2,22044604925031e-16	30 x 30	19 p13	SIN3 transcription regulator family member B [Source:HGNC Symbol;Acc:HGNC:19354]
TFF2	87	ENSG00000160181	TFF2	0,752148833007227	0,184411351587909	0,202331684160693	-0,5556650757566	95	0,719310481994561	11,8511851739549	0	30 x 30	NA	trefoil factor 2 [Source:HGNC Symbol;Acc:HGNC:11756]
SFTPD	88	ENSG00000133661	SFTPD	0,73728277868568	0,206105600600422	0,202151702016074	-0,602035114300969	92	0,675719830879604	10,4915924638547	0	30 x 30	10 q22	surfactant protein D [Source:HGNC Symbol;Acc:HGNC:10803]
GABRA5	89	ENSG00000186297	GABRA5	0,684151813231538	0,151618607727796	0,201885511329866	-0,562595986118755	95	0,671702155894004	10,3776477043677	0	28 x 30	15 q12	gamma-aminobutyric acid (GABA) A receptor, alpha 5 [Source:HGNC Symbol;Acc:HGNC:4079]
TNFRSF1A	90	ENSG00000067182	TNFRSF1A	0,772563081367413	0,19820567961089	0,192406698582462	-0,641518629753378	94	0,49575410029089	6,53357188820018	6,50265619128731e-10	30 x 30	12 p13	tumor necrosis factor receptor superfamily, member 1A [Source:HGNC Symbol;Acc:HGNC:11916]
ABCB4	91	ENSG00000005471	ABCB4	0,771322411755809	0,155448355712873	0,181297842880783	-0,620026615928741	98	0,679721536090228	10,6067947343439	0	30 x 30	7 q21	ATP-binding cassette, sub-family B (MDR/TAP), member 4 [Source:HGNC Symbol;Acc:HGNC:45]
ASB4	92	ENSG00000005981	ASB4	0,773337928600637	0,133911789451695	0,177747704356756	-0,443812822911414	99	0,774775793909948	14,0259540186302	0	30 x 30	7 q21	ankyrin repeat and SOCS box containing 4 [Source:HGNC Symbol;Acc:HGNC:16009]
GPR116	93	ENSG00000069122	GPR116	0,781072532338223	0,164816252058252	0,177030328939973	-0,603280638573812	98	0,73030590704658	12,2361079249906	0	30 x 30	6 p12	G protein-coupled receptor 116 [Source:HGNC Symbol;Acc:HGNC:19030]
ERCC3	94	ENSG00000163161	ERCC3	0,776093071724546	0,1866112453436	0,176527182912045	-0,5367116582659	95	0,611802476752835	8,85247255761686	2,55351295663786e-15	30 x 30	2 q14	excision repair cross-complementation group 3 [Source:HGNC Symbol;Acc:HGNC:3435]
PLG	95	ENSG00000122194	PLG	0,727475587927469	0,141967568733989	0,17530031508005	-0,416732673178096	98	0,778923213622678	14,2160886208005	0	30 x 30	6 q26	plasminogen [Source:HGNC Symbol;Acc:HGNC:9071]
CCKAR	96	ENSG00000163394	CCKAR	0,742971268835218	0,149722051862136	0,167688561490597	-0,526602754526947	98	0,696056479190971	11,0959253976572	0	30 x 30	4 p15	cholecystokinin A receptor [Source:HGNC Symbol;Acc:HGNC:1570]
LIMK1	97	ENSG00000106683	LIMK1	0,794901839209367	0,200331128546166	0,165328184600157	-0,664810179535182	94	0,587334974358686	8,30593229122323	5,39568389967826e-14	30 x 30	7 q11	LIM domain kinase 1 [Source:HGNC Symbol;Acc:HGNC:6613]
CDH17	98	ENSG00000079112	CDH17	0,781685440895189	0,148186119707097	0,160976673014586	-0,532616940591931	98	0,791310822116544	14,8131463699238	0	30 x 30	8 q22	cadherin 17, LI cadherin (liver-intestine) [Source:HGNC Symbol;Acc:HGNC:1756]
CHD2	99	ENSG00000279765	CHD2	0,784640972578401	0,139741094906231	0,156399932559444	-0,571383980034541	98	0,607971662427693	8,76437717640034	4,21884749357559e-15	30 x 28	15 q26	chromodomain helicase DNA binding protein 2 [Source:HGNC Symbol;Acc:HGNC:1917]
LCN2	100	ENSG00000148346	LCN2	0,791350734568112	0,176922218941794	0,154651876083517	-0,591899033179641	95	0,638900207562575	9,50558396755776	0	30 x 30	9 q34	lipocalin 2 [Source:HGNC Symbol;Acc:HGNC:6526]
HSPA2	101	ENSG00000126803	HSPA2	0,836779292878324	0,165612503111286	0,137604827046488	-0,558701666813161	96	0,554747903523599	7,63129673596959	2,12674322597195e-12	30 x 28	14 q23	heat shock 70kDa protein 2 [Source:HGNC Symbol;Acc:HGNC:5235]
NID1	102	ENSG00000116962	NID1	0,82070044647637	0,174675717179082	0,135640973072503	-0,700116659876119	95	0,462186289843941	5,96534297136641	1,07003541582884e-08	28 x 30	1 q42	nidogen 1 [Source:HGNC Symbol;Acc:HGNC:7821]
SERPINB2	103	ENSG00000197632	SERPINB2	0,844331772580135	0,147543920551806	0,126266877795805	-0,711243088632766	97	0,608915885172702	8,78599989922317	3,77475828372553e-15	30 x 29	NA	serpin peptidase inhibitor, clade B (ovalbumin), member 2 [Source:HGNC Symbol;Acc:HGNC:8584]
SERPINB5	104	ENSG00000206075	SERPINB5	0,860518158354486	0,167838380047973	0,113865961570326	-0,625823508330676	97	0,563397824200787	7,80500370984683	8,33777491493493e-13	30 x 29	NA	serpin peptidase inhibitor, clade B (ovalbumin), member 5 [Source:HGNC Symbol;Acc:HGNC:8949]

## Sheet: Dmet Spot iv
	Rank	ID	Symbol	mean expression	SD	max delta e	min delta e	% high expressed	correlation	->t.score	->p.value	Metagene	Chromosome	Description
IL10	1	ENSG00000136634	IL10	0,354344480225225	0,21124439665664	0,598275774411367	-0,307109510497155	38	0,655416650053116	9,93235683493258	0	30 x 1	1 q32	interleukin 10 [Source:HGNC Symbol;Acc:HGNC:5962]
E2F5	2	ENSG00000133740	E2F5	0,153133477057767	0,138266580150816	0,592625767240479	-0,132313924129195	9	0,587986355362644	8,32000741387338	4,9960036108132e-14	30 x 1	8 q21	E2F transcription factor 5, p130-binding [Source:HGNC Symbol;Acc:HGNC:3119]
ELL	3	ENSG00000105656	ELL	0,236841084328641	0,184728441335383	0,588783356523489	-0,211777468254706	26	0,506489279308889	6,72317764427729	2,48642217925976e-10	30 x 1	19 p13	elongation factor RNA polymerase II [Source:HGNC Symbol;Acc:HGNC:23114]
SMARCB1	4	ENSG00000275837	SMARCB1	0,23694278707239	0,194703240286687	0,582445194130618	-0,201472785180159	24	0,582394518234771	8,19997344691071	9,67004254448511e-14	30 x 1	NA	SWI/SNF related, matrix associated, actin dependent regulator of chromatin, subfamily b, member 1 [Source:HGNC Symbol;Acc:HGNC:11103]
CRK	5	ENSG00000167193	CRK	0,258762264693821	0,158580148528109	0,58120460823851	-0,19239930986926	25	0,644444069301328	9,64622443241356	0	30 x 1	17 p13	v-crk avian sarcoma virus CT10 oncogene homolog [Source:HGNC Symbol;Acc:HGNC:2362]
DDIT3	6	ENSG00000175197	DDIT3	0,346289743265777	0,247134469070029	0,580079816383345	-0,291917729368534	40	0,674182912464308	10,4478037819776	0	30 x 1	12 q13	DNA-damage-inducible transcript 3 [Source:HGNC Symbol;Acc:HGNC:2726]
ZAP70	7	ENSG00000115085	ZAP70	0,266229203193868	0,184805228942193	0,578571232771044	-0,232500377015923	27	0,540272594959517	7,34851518003265	9,60853618892088e-12	30 x 1	2 q11	zeta-chain (TCR) associated protein kinase 70kDa [Source:HGNC Symbol;Acc:HGNC:12858]
MMP10	8	ENSG00000166670	MMP10	0,271687339241365	0,205354601012825	0,573113096723547	-0,231796341183721	31	0,572876459731071	7,99967907371442	2,89546164822241e-13	30 x 1	11 q22	matrix metallopeptidase 10 (stromelysin 2) [Source:HGNC Symbol;Acc:HGNC:7156]
IL18BP	9	ENSG00000137496	IL18BP	0,25180188852967	0,160728941201276	0,537291504264816	-0,209922319123655	25	0,651978654316811	9,84155827435044	0	30 x 1	11 q13	interleukin 18 binding protein [Source:HGNC Symbol;Acc:HGNC:5987]
RUNX3	10	ENSG00000020633	RUNX3	0,255162480484435	0,164191221757612	0,535640990066944	-0,219692478592204	21	0,548085354712572	7,49994686205557	4,29589697148458e-12	30 x 1	1 p36	runt-related transcription factor 3 [Source:HGNC Symbol;Acc:HGNC:10473]
GRB7	11	ENSG00000141738	GRB7	0,302760999980543	0,175611817932414	0,526323487425472	-0,261554120068263	35	0,579228023248858	8,13278680524002	1,3988810110277e-13	30 x 1	17 q12	growth factor receptor-bound protein 7 [Source:HGNC Symbol;Acc:HGNC:4567]
CLDN4	12	ENSG00000189143	CLDN4	0,388176139492001	0,234476835825263	0,511443623289954	-0,336611509644883	42	0,801147218792057	15,3217205308797	0	30 x 1	7 q11	claudin 4 [Source:HGNC Symbol;Acc:HGNC:2046]
CTSD	13	ENSG00000117984	CTSD	0,35032301688703	0,206757092416215	0,507797231295927	-0,318828262851942	34	0,616858492968573	8,97027151620179	1,33226762955019e-15	30 x 1	11 p15	cathepsin D [Source:HGNC Symbol;Acc:HGNC:2529]
CD86	14	ENSG00000114013	CD86	0,239914316749072	0,146143203233772	0,500385927047921	-0,189475421598696	19	0,514160136059466	6,86122359344848	1,2252954206815e-10	30 x 1	3 q13	CD86 molecule [Source:HGNC Symbol;Acc:HGNC:1705]
RAN	15	ENSG00000132341	RAN	0,295559288560819	0,182223102291124	0,498775258682289	-0,252005677370343	30	0,648328588480032	9,74631385335282	0	30 x 1	12 q24	RAN, member RAS oncogene family [Source:HGNC Symbol;Acc:HGNC:9846]
STAT5A	16	ENSG00000126561	STAT5A	0,227899990256091	0,144968745975467	0,488337788240149	-0,166195789737294	16	0,693986753649602	11,0321894408889	0	30 x 1	17 q21	signal transducer and activator of transcription 5A [Source:HGNC Symbol;Acc:HGNC:11366]
LCK	17	ENSG00000182866	LCK	0,417908162339137	0,191028790988963	0,486390208588181	-0,314393927953172	55	0,648812842448914	9,75888256157767	0	30 x 1	1 p35	LCK proto-oncogene, Src family tyrosine kinase [Source:HGNC Symbol;Acc:HGNC:6524]
DNAJC15	18	ENSG00000120675	DNAJC15	0,326732880285564	0,159737611413754	0,477513206431228	-0,271087128230426	42	0,685869944791146	10,7872474362816	0	30 x 1	NA	DnaJ (Hsp40) homolog, subfamily C, member 15 [Source:HGNC Symbol;Acc:HGNC:20325]
SFTPB	19	ENSG00000168878	SFTPB	0,450081963730812	0,214721443950871	0,476287595918311	-0,414032058447604	61	0,733535116472439	12,3529375009599	0	30 x 1	2 p11	surfactant protein B [Source:HGNC Symbol;Acc:HGNC:10801]
MBD2	20	ENSG00000134046	MBD2	0,340614934932416	0,190282429107092	0,472129041195404	-0,276425125458731	41	0,709245002557723	11,5150592990103	0	30 x 1	NA	methyl-CpG binding domain protein 2 [Source:HGNC Symbol;Acc:HGNC:6917]
IL4	21	ENSG00000113520	IL4	0,426774520241647	0,250497833355313	0,468190383392438	-0,380351687904555	52	0,807653922800153	15,6769525510263	0	30 x 1	5 q31	interleukin 4 [Source:HGNC Symbol;Acc:HGNC:6014]
LMO2	22	ENSG00000135363	LMO2	0,503229940901464	0,25846086012915	0,467368709474476	-0,458313586127028	62	0,449394813210938	5,75771551579817	2,88079469168423e-08	30 x 1	11 p13	LIM domain only 2 (rhombotin-like 1) [Source:HGNC Symbol;Acc:HGNC:6642]
MPL	23	ENSG00000117400	MPL	0,271438039415927	0,142591285550469	0,465032627814649	-0,223686944415927	26	0,794028868665109	14,9504425837102	0	30 x 1	1 p34	MPL proto-oncogene, thrombopoietin receptor [Source:HGNC Symbol;Acc:HGNC:7217]
NAT2	24	ENSG00000156006	NAT2	0,414500432705514	0,24749495872792	0,458864266417293	-0,386999935725564	50	0,799858446728819	15,2532003599214	0	30 x 1	8 p22	N-acetyltransferase 2 (arylamine N-acetyltransferase) [Source:HGNC Symbol;Acc:HGNC:7646]
PTHLH	25	ENSG00000087494	PTHLH	0,411981923347382	0,171781318312623	0,453759800462143	-0,317872740252143	60	0,613440373838783	8,89044085809263	2,1094237467878e-15	30 x 1	12 p11	parathyroid hormone-like hormone [Source:HGNC Symbol;Acc:HGNC:9607]
BLK	26	ENSG00000136573	BLK	0,345516276567999	0,197720250852517	0,453749322554808	-0,309084433522886	41	0,749434266222372	12,9556599506941	0	30 x 1	8 p23	BLK proto-oncogene, Src family tyrosine kinase [Source:HGNC Symbol;Acc:HGNC:1057]
MST1R	27	ENSG00000164078	MST1R	0,439615064080662	0,177567218801295	0,450574171007057	-0,388924798583168	65	0,610203666363194	8,81558586813375	3,10862446895044e-15	30 x 1	3 p21	macrophage stimulating 1 receptor (c-met-related tyrosine kinase) [Source:HGNC Symbol;Acc:HGNC:7381]
PLA2G2A	28	ENSG00000188257	PLA2G2A	0,285464689920073	0,171859626823945	0,449058715092458	-0,237943496812303	29	0,871968846722985	20,3858807555591	0	30 x 1	1 p36	phospholipase A2, group IIA (platelets, synovial fluid) [Source:HGNC Symbol;Acc:HGNC:9031]
RARA	29	ENSG00000131759	RARA	0,317816100329941	0,165092197542075	0,438846300233968	-0,285328721650743	41	0,631104859959208	9,3120385387001	2,22044604925031e-16	30 x 1	17 q21	retinoic acid receptor, alpha [Source:HGNC Symbol;Acc:HGNC:9864]
KRT1	30	ENSG00000167768	KRT1	0,443902666235683	0,189582262812392	0,437319259202914	-0,370023949944956	61	0,830317560453232	17,0528981351471	0	30 x 1	12 q13	keratin 1 [Source:HGNC Symbol;Acc:HGNC:6412]
PROM1	31	ENSG00000007062	PROM1	0,468015860953794	0,260176115564454	0,433018383908361	-0,436338952833493	59	0,574591360997699	8,0354028580534	2,38253861084559e-13	30 x 1	4 p15	prominin 1 [Source:HGNC Symbol;Acc:HGNC:9454]
S100A4	32	ENSG00000196154	S100A4	0,446925847480138	0,142628236259457	0,431120611730388	-0,291533774310965	72	0,573942646035454	8,02187072921155	2,56461518688411e-13	30 x 2	1 q21	S100 calcium binding protein A4 [Source:HGNC Symbol;Acc:HGNC:10494]
TNF	33	ENSG00000228849	TNF	0,399109156017732	0,130705780934842	0,423469424934648	-0,329659894501442	58	0,746220213929354	12,8299403716992	0	30 x 1	NA	tumor necrosis factor [Source:HGNC Symbol;Acc:HGNC:11892]
PRDM2	34	ENSG00000116731	PRDM2	0,507681651452268	0,229949950472805	0,418687908196855	-0,429254501627707	67	0,747070450840236	12,8629983122083	0	30 x 1	1 p36	PR domain containing 2, with ZNF domain [Source:HGNC Symbol;Acc:HGNC:9347]
MPO	35	ENSG00000005381	MPO	0,251350920061064	0,148521127105384	0,409110299462745	-0,209270535311691	23	0,713554742104253	11,6571701213684	0	30 x 1	17 q22	myeloperoxidase [Source:HGNC Symbol;Acc:HGNC:7218]
LEFTY2	36	ENSG00000143768	LEFTY2	0,52197688146429	0,274284163962759	0,401379991969293	-0,448594954895368	66	0,737785894892489	12,5094967064636	0	30 x 1	1 q42	left-right determination factor 2 [Source:HGNC Symbol;Acc:HGNC:3122]
PTK6	37	ENSG00000101213	PTK6	0,130068699582773	0,106728193836772	0,393758870279383	-0,108060976273249	6	0,776672385605476	14,1123267225521	0	30 x 1	NA	protein tyrosine kinase 6 [Source:HGNC Symbol;Acc:HGNC:9617]
CCL3	38	ENSG00000274221	CCL3	0,372375208421665	0,162099550352835	0,388186755613422	-0,271414628366527	48	0,820322075854849	16,4171803146374	0	30 x 1	NA	chemokine (C-C motif) ligand 3 [Source:HGNC Symbol;Acc:HGNC:10627]
MMP8	39	ENSG00000118113	MMP8	0,518779794344414	0,213107710775834	0,383996108663105	-0,43526017138702	74	0,671548584176006	10,3733257111877	0	30 x 1	11 q22	matrix metallopeptidase 8 (neutrophil collagenase) [Source:HGNC Symbol;Acc:HGNC:7175]
KRT13	40	ENSG00000171401	KRT13	0,516728420583234	0,202604410747132	0,369308903978169	-0,401912413868949	74	0,716318612552827	11,7497197042549	0	30 x 1	17 q21	keratin 13 [Source:HGNC Symbol;Acc:HGNC:6415]
NOTCH4	41	ENSG00000238196	NOTCH4	0,196298364860931	0,135371628661702	0,368724624775661	-0,158844423142885	15	0,806163070641484	15,5941536040772	0	30 x 1	NA	notch 4 [Source:HGNC Symbol;Acc:HGNC:7884]
AXIN1	42	ENSG00000103126	AXIN1	0,588026132111237	0,259478695276043	0,366454385056683	-0,518058976885673	75	0,3742459178747	4,61911363262996	4,54767743685025e-06	30 x 1	16 p13	axin 1 [Source:HGNC Symbol;Acc:HGNC:903]
DDR1	43	ENSG00000215522	DDR1	0,147653747662323	0,10616351155568	0,362622203766248	-0,120760216722473	6	0,727706224236516	12,1433337494501	0	29 x 1	NA	discoidin domain receptor tyrosine kinase 1 [Source:HGNC Symbol;Acc:HGNC:2730]
CXCL9	44	ENSG00000138755	CXCL9	0,574928983991784	0,290491519103247	0,361313438439294	-0,523699757174741	68	0,414089675403812	5,20686117753738	3,62212865034905e-07	30 x 1	4 q21	chemokine (C-X-C motif) ligand 9 [Source:HGNC Symbol;Acc:HGNC:7098]
RHOH	45	ENSG00000168421	RHOH	0,26849959561624	0,139527655648503	0,345463127867469	-0,228821034206465	28	0,815872739199482	16,1493973194291	0	30 x 1	4 p14	ras homolog family member H [Source:HGNC Symbol;Acc:HGNC:686]
BCR	46	ENSG00000186716	BCR	0,612008756841446	0,265398856702767	0,335324058196148	-0,575341236593325	77	0,472258179620605	6,13214468462003	4,76544403937851e-09	30 x 1	NA	breakpoint cluster region [Source:HGNC Symbol;Acc:HGNC:1014]
IAPP	47	ENSG00000121351	IAPP	0,618713651330045	0,227259111281156	0,330640544534617	-0,539119895485434	83	0,712586762849422	11,6250204041892	0	30 x 1	12 p12	islet amyloid polypeptide [Source:HGNC Symbol;Acc:HGNC:5329]
SLC22A18	48	ENSG00000110628	SLC22A18	0,582817065739574	0,197498211036942	0,326199818095012	-0,455609267804737	80	0,635325253377248	9,41622548031395	1,11022302462516e-16	30 x 1	11 p15	solute carrier family 22, member 18 [Source:HGNC Symbol;Acc:HGNC:10964]
LRRC32	49	ENSG00000137507	LRRC32	0,367321505456432	0,121583101040282	0,323675732187678	-0,309442390970217	47	0,77454938192093	14,0157066706884	0	30 x 1	11 q13	leucine rich repeat containing 32 [Source:HGNC Symbol;Acc:HGNC:4161]
MUC1	50	ENSG00000185499	MUC1	0,194470291101438	0,121126312750157	0,319715820151695	-0,138495784355824	17	0,643639626861019	9,62565780036262	0	30 x 2	1 q22	mucin 1, cell surface associated [Source:HGNC Symbol;Acc:HGNC:7508]
HLA-DPB1	51	ENSG00000230763	HLA-DPB1	0,365743186328679	0,135980893418044	0,318809671816685	-0,302302086316148	50	0,778719180111469	14,2066257371165	0	30 x 1	NA	major histocompatibility complex, class II, DP beta 1 [Source:HGNC Symbol;Acc:HGNC:4940]
MMP9	52	ENSG00000100985	MMP9	0,257999207997579	0,13442332615927	0,314804530511194	-0,195439582617879	27	0,825081218156349	16,7137164072102	0	30 x 1	NA	matrix metallopeptidase 9 (gelatinase B, 92kDa gelatinase, 92kDa type IV collagenase) [Source:HGNC Symbol;Acc:HGNC:7176]
SYK	53	ENSG00000165025	SYK	0,184108720242062	0,108075971570404	0,30943177581057	-0,143737111744568	10	0,715239438569694	11,7134493575158	0	30 x 1	9 q22	spleen tyrosine kinase [Source:HGNC Symbol;Acc:HGNC:11491]
CSF3	54	ENSG00000108342	CSF3	0,481240382715435	0,183530672814622	0,299273955567773	-0,397720759758042	74	0,750322853476689	12,9907834848481	0	30 x 1	17 q21	colony stimulating factor 3 (granulocyte) [Source:HGNC Symbol;Acc:HGNC:2438]
THPO	55	ENSG00000090534	THPO	0,639008454183626	0,184288452569828	0,298950680653467	-0,45993647959716	91	0,759605198392017	13,3675993894564	0	30 x 1	3 q27	thrombopoietin [Source:HGNC Symbol;Acc:HGNC:11795]
WEE1	56	ENSG00000166483	WEE1	0,650990619022019	0,261608155678898	0,298363576842642	-0,556164353019513	79	0,673922358269475	10,4404050230354	0	30 x 1	11 p15	WEE1 G2 checkpoint kinase [Source:HGNC Symbol;Acc:HGNC:12761]
PMP22	57	ENSG00000109099	PMP22	0,619156808085599	0,12888138920316	0,277179033017158	-0,315413823657028	96	0,778234032130968	14,1841709714311	0	30 x 1	17 p12	peripheral myelin protein 22 [Source:HGNC Symbol;Acc:HGNC:9118]
HLA-DOB	58	ENSG00000243612	HLA-DOB	0,615435357299254	0,144474090531904	0,274753877788465	-0,356773258752888	95	0,705162843113515	11,3828504590281	0	30 x 1	NA	major histocompatibility complex, class II, DO beta [Source:HGNC Symbol;Acc:HGNC:4937]
FGFR4	59	ENSG00000160867	FGFR4	0,673438124208529	0,201496163681889	0,257727958999491	-0,496937050338855	89	0,779333308112271	14,2351431696495	0	30 x 1	5 q35	fibroblast growth factor receptor 4 [Source:HGNC Symbol;Acc:HGNC:3691]
FGR	60	ENSG00000000938	FGR	0,714342068805538	0,25575382316703	0,250627711144337	-0,62824102854614	86	0,564959318293238	7,83675667397869	7,02105040772949e-13	30 x 1	1 p35	FGR proto-oncogene, Src family tyrosine kinase [Source:HGNC Symbol;Acc:HGNC:3697]
RIPK1	61	ENSG00000137275	RIPK1	0,741749121332787	0,190581592830175	0,221085264882752	-0,532058476959353	94	0,649350153787665	9,7728523297899	0	30 x 1	6 p25	receptor (TNFRSF)-interacting serine-threonine kinase 1 [Source:HGNC Symbol;Acc:HGNC:10019]
AATK	62	ENSG00000181409	AATK	0,731344796262922	0,131011987418228	0,201566074539083	-0,363609209195253	100	0,703228388544649	11,3209903768951	0	30 x 1	17 q25	apoptosis-associated tyrosine kinase [Source:HGNC Symbol;Acc:HGNC:21]
BCL2A1	63	ENSG00000140379	BCL2A1	0,806699637575951	0,2290081217489	0,167684482348861	-0,66916896009976	92	0,586734739401146	8,29298415532506	5,79536418854332e-14	30 x 1	15 q25	BCL2-related protein A1 [Source:HGNC Symbol;Acc:HGNC:991]

## Sheet: Dmet Spot v
	Rank	ID	Symbol	mean expression	SD	max delta e	min delta e	% high expressed	correlation	->t.score	->p.value	Metagene	Chromosome	Description
TGFB2	1	ENSG00000092969	TGFB2	0,112411488698061	0,145743288412499	0,834921326339533	-0,0779208872318955	6	0,51399958176596	6,85831162240148	1,24380505894806e-10	7 x 1	1 q41	transforming growth factor, beta 2 [Source:HGNC Symbol;Acc:HGNC:11768]
JAG1	2	ENSG00000101384	JAG1	0,103748915027776	0,161712889759262	0,814746803769216	-0,0880495709939416	7	0,478771011787353	6,24164048989785	2,78503298201116e-09	6 x 1	NA	jagged 1 [Source:HGNC Symbol;Acc:HGNC:6188]
MYH11	3	ENSG00000133392	MYH11	0,112388015798509	0,162247801181261	0,798271814527305	-0,0921055536832212	9	0,408841139443247	5,12751717413835	5,15216986851641e-07	7 x 1	16 p13	myosin, heavy chain 11, smooth muscle [Source:HGNC Symbol;Acc:HGNC:7569]
EPHB2	4	ENSG00000133216	EPHB2	0,0873846364399909	0,152551868426194	0,789028214687829	-0,0660986721643017	6	0,457661819738154	5,89137750109825	1,52599408664855e-08	7 x 1	1 p36	EPH receptor B2 [Source:HGNC Symbol;Acc:HGNC:3393]
TIMP2	5	ENSG00000035862	TIMP2	0,173727138481005	0,184907396434738	0,744768580315987	-0,154959341883261	13	0,553914053083666	7,61474322731894	2,32436292435523e-12	4 x 1	17 q25	TIMP metallopeptidase inhibitor 2 [Source:HGNC Symbol;Acc:HGNC:11821]
BMP3	6	ENSG00000152785	BMP3	0,131980065698551	0,202116982139298	0,724618289815234	-0,105763665318852	11	0,415343132647816	5,22590226597928	3,32684175763376e-07	5 x 1	4 q21	bone morphogenetic protein 3 [Source:HGNC Symbol;Acc:HGNC:1070]
ABL1	7	ENSG00000097007	ABL1	0,160658057687857	0,212657526867295	0,723784011422419	-0,136055345734223	14	0,359948567481983	4,41577990123977	1,04301224861381e-05	6 x 1	9 q34	ABL proto-oncogene 1, non-receptor tyrosine kinase [Source:HGNC Symbol;Acc:HGNC:76]
ITGA2	8	ENSG00000164171	ITGA2	0,220168945987846	0,272301848050799	0,719265534713909	-0,201753308980327	29	0,310738360407786	3,74179903299798	0,000136145796786558	8 x 1	5 q11	integrin, alpha 2 (CD49B, alpha 2 subunit of VLA-2 receptor) [Source:HGNC Symbol;Acc:HGNC:6137]
HPSE	9	ENSG00000173083	HPSE	0,0991333522190062	0,15564923757925	0,718680604422598	-0,0800515345611114	8	0,559722423327679	7,73074613446035	1,24522614441958e-12	5 x 1	4 q21	heparanase [Source:HGNC Symbol;Acc:HGNC:5164]
DLL1	10	ENSG00000275555	DLL1	0,236052503345761	0,219116065339584	0,701906631491332	-0,196613340075084	17	0,369022957235673	4,54440352504497	6,18689203957246e-06	7 x 1	NA	delta-like 1 (Drosophila) [Source:HGNC Symbol;Acc:HGNC:2908]
TGFBR3	11	ENSG00000069702	TGFBR3	0,0867008985630618	0,14415791984761	0,697354169168767	-0,0699466222811069	8	0,388288799275233	4,8225571667372	1,93520204982978e-06	8 x 1	1 p22	transforming growth factor, beta receptor III [Source:HGNC Symbol;Acc:HGNC:11774]
FN1	12	ENSG00000115414	FN1	0,161454809232141	0,14672389460473	0,696665438950817	-0,134123468262216	13	0,49364889594989	6,49686251081139	7,82143239064226e-10	6 x 1	2 q35	fibronectin 1 [Source:HGNC Symbol;Acc:HGNC:3778]
MATK	13	ENSG00000007264	MATK	0,190488215914052	0,170673518935795	0,693953853196223	-0,168959268541872	14	0,485218837641417	6,35136034841851	1,61820512545319e-09	4 x 1	19 p13	megakaryocyte-associated tyrosine kinase [Source:HGNC Symbol;Acc:HGNC:6906]
PDE1B	14	ENSG00000123360	PDE1B	0,166136423068649	0,19087860103094	0,687129131317316	-0,138635926088699	15	0,508500761689601	6,75916524732515	2,06881178854701e-10	4 x 1	12 q13	phosphodiesterase 1B, calmodulin-dependent [Source:HGNC Symbol;Acc:HGNC:8775]
MGMT	15	ENSG00000170430	MGMT	0,113867044598084	0,159803206517723	0,658975874888132	-0,0899271213462039	11	0,385583013357186	4,78305812585941	2,28855293937791e-06	6 x 2	10 q26	O-6-methylguanine-DNA methyltransferase [Source:HGNC Symbol;Acc:HGNC:7059]
DSP	16	ENSG00000096696	DSP	0,130242231184295	0,152880413586428	0,579645688314452	-0,0941923259010873	11	0,641269972387363	9,56538984647822	0	5 x 1	6 p24	desmoplakin [Source:HGNC Symbol;Acc:HGNC:3052]
FGF8	17	ENSG00000107831	FGF8	0,0962172802331392	0,135985183192591	0,559920704779392	-0,0753977273045678	7	0,585135917234818	8,25859622046918	7,00550728538474e-14	6 x 1	10 q24	fibroblast growth factor 8 (androgen-induced) [Source:HGNC Symbol;Acc:HGNC:3686]
PTCH2	18	ENSG00000117425	PTCH2	0,327465207660891	0,173224308693718	0,556976861449385	-0,237624496796229	35	0,429695824835975	5,44655234331613	1,2255333614597e-07	7 x 1	1 p34	patched 2 [Source:HGNC Symbol;Acc:HGNC:9586]
GP1BB	19	ENSG00000203618	GP1BB	0,253414124166959	0,184838368765229	0,53064094356487	-0,215960182448914	27	0,489998123446771	6,43355942643138	1,074179745153e-09	5 x 1	NA	glycoprotein Ib (platelet), beta polypeptide [Source:HGNC Symbol;Acc:HGNC:4440]
PTPRF	20	ENSG00000142949	PTPRF	0,14575231494474	0,139447325066502	0,521643686345987	-0,128041270625191	8	0,451906721237588	5,7981287183453	2,37922062051865e-08	7 x 1	1 p34	protein tyrosine phosphatase, receptor type, F [Source:HGNC Symbol;Acc:HGNC:9670]
POMC	21	ENSG00000115138	POMC	0,0988961349638853	0,107732410506863	0,519116606953408	-0,0740373855653891	6	0,502209587399138	6,6470985627265	3,66232821846779e-10	8 x 1	2 p23	proopiomelanocortin [Source:HGNC Symbol;Acc:HGNC:9201]
PGF	22	ENSG00000119630	PGF	0,344921081799263	0,182936493445856	0,476268640005248	-0,291537186383223	46	0,359505065190816	4,40953096528393	1,06954712891794e-05	7 x 1	14 q24	placental growth factor [Source:HGNC Symbol;Acc:HGNC:8893]
F2R	23	ENSG00000181104	F2R	0,446696272783415	0,17385236360747	0,41593428811884	-0,297679484826022	62	0,424766234910256	5,37021461799738	1,73601658604028e-07	7 x 1	5 q13	coagulation factor II (thrombin) receptor [Source:HGNC Symbol;Acc:HGNC:3537]
ZP3	24	ENSG00000188372	ZP3	0,534400839548825	0,165642525335369	0,412931975488769	-0,468999873085166	89	0,358078384036402	4,38945230300675	1,15927874295707e-05	7 x 1	7 q11	zona pellucida glycoprotein 3 (sperm receptor) [Source:HGNC Symbol;Acc:HGNC:13189]
CDKN2A	25	ENSG00000147889	CDKN2A	0,163406852036068	0,148230051271342	0,39577564860303	-0,141399128726544	15	0,445390701090917	5,69364770628967	3,895532141307e-08	7 x 1	9 p21	cyclin-dependent kinase inhibitor 2A [Source:HGNC Symbol;Acc:HGNC:1787]
RARRES1	26	ENSG00000118849	RARRES1	0,590405153578128	0,151165780672771	0,337531429629892	-0,324805043299932	98	0,520950047100503	6,98528054758316	6,45286046818683e-11	5 x 1	3 q25	retinoic acid receptor responder (tazarotene induced) 1 [Source:HGNC Symbol;Acc:HGNC:9867]
IGFBP1	27	ENSG00000146678	IGFBP1	0,691383177303154	0,22631607836289	0,273586602646721	-0,635085203506162	89	0,403454847702806	5,04672572834925	7,35106875593416e-07	4 x 1	7 p12	insulin-like growth factor binding protein 1 [Source:HGNC Symbol;Acc:HGNC:5469]
BMP6	1	ENSG00000153162	BMP6	0,122902701021237	0,2368141097766	0,842067078928638	-0,102620238905949	11	0,569643881998781	7,93276390029925	4,16888745746746e-13	2 x 1	6 p24	bone morphogenetic protein 6 [Source:HGNC Symbol;Acc:HGNC:1073]
TIAM1	2	ENSG00000156299	TIAM1	0,126903865465468	0,22542257153879	0,77739450546185	-0,110662941104566	12	0,441983483383507	5,63946646344214	5,02073378427781e-08	3 x 1	NA	T-cell lymphoma invasion and metastasis 1 [Source:HGNC Symbol;Acc:HGNC:11805]
ABCB1	3	ENSG00000085563	ABCB1	0,149335425618727	0,246422136107691	0,774021447814856	-0,134519667314216	17	0,633728654730192	9,37664680468213	1,11022302462516e-16	1 x 1	7 q21	ATP-binding cassette, sub-family B (MDR/TAP), member 1 [Source:HGNC Symbol;Acc:HGNC:40]
TCF7L2	4	ENSG00000148737	TCF7L2	0,133488743425914	0,202007606219698	0,736690153942506	-0,113754146177794	14	0,654984977048835	9,92089734633725	0	1 x 1	10 q25	transcription factor 7-like 2 (T-cell specific, HMG-box) [Source:HGNC Symbol;Acc:HGNC:11641]
CYP1A1	5	ENSG00000140465	CYP1A1	0,181666144928948	0,236370480443739	0,734906002439472	-0,159175190694612	20	0,618933705996601	9,01913694684856	9,99200722162641e-16	1 x 1	15 q24	cytochrome P450, family 1, subfamily A, polypeptide 1 [Source:HGNC Symbol;Acc:HGNC:2595]
SEZ6L	6	ENSG00000100095	SEZ6L	0,218069562603237	0,255690581859275	0,716605627246387	-0,196540615231057	26	0,586785994844842	8,29408901132564	5,76205749780456e-14	1 x 1	NA	seizure related 6 homolog (mouse)-like [Source:HGNC Symbol;Acc:HGNC:10763]
CAV2	7	ENSG00000105971	CAV2	0,232836895119933	0,293054955879342	0,713165715531696	-0,216595970759031	27	0,569979964067182	7,93969531736195	4,01456645704457e-13	1 x 1	7 q31	caveolin 2 [Source:HGNC Symbol;Acc:HGNC:1528]
DST	8	ENSG00000151914	DST	0,233062676989108	0,279130782402016	0,707978228148737	-0,210571722754772	26	0,695276064890852	11,0718304754031	0	1 x 1	6 p12	dystonin [Source:HGNC Symbol;Acc:HGNC:1090]
EPHB3	9	ENSG00000182580	EPHB3	0,236423256692153	0,262053386686863	0,704617648445692	-0,216140794576865	26	0,738894901331377	12,550874134584	0	1 x 1	3 q27	EPH receptor B3 [Source:HGNC Symbol;Acc:HGNC:3394]
ERBB3	10	ENSG00000065361	ERBB3	0,22096774500864	0,216312474897503	0,688049138825947	-0,194312046336961	23	0,522623802718786	7,01613837556132	5,49735812427343e-11	3 x 1	12 q13	v-erb-b2 avian erythroblastic leukemia viral oncogene homolog 3 [Source:HGNC Symbol;Acc:HGNC:3431]
NTRK3	11	ENSG00000140538	NTRK3	0,246748876486988	0,287988809714868	0,682781644565643	-0,224257922252652	27	0,685236211239466	10,768449598369	0	1 x 1	15 q25	neurotrophic tyrosine kinase, receptor, type 3 [Source:HGNC Symbol;Acc:HGNC:8033]
ETS2	12	ENSG00000157557	ETS2	0,239454683665894	0,301373574328097	0,677117463702527	-0,221039046658375	27	0,579179641048111	8,13176455712204	1,40554234917545e-13	1 x 1	NA	v-ets avian erythroblastosis virus E26 oncogene homolog 2 [Source:HGNC Symbol;Acc:HGNC:3489]
ESR1	13	ENSG00000091831	ESR1	0,227952138345714	0,233447292797352	0,676346232581604	-0,195464759666516	20	0,480917261129627	6,27801460375048	2,32746599770906e-09	1 x 1	6 q25	estrogen receptor 1 [Source:HGNC Symbol;Acc:HGNC:3467]
FLT3	14	ENSG00000122025	FLT3	0,250838933712505	0,260638288429684	0,674140309645891	-0,230297814832806	25	0,692551867246609	10,98831319346	0	1 x 1	NA	fms-related tyrosine kinase 3 [Source:HGNC Symbol;Acc:HGNC:3765]
IGF1R	15	ENSG00000140443	IGF1R	0,264967043507632	0,284162233618208	0,667943827294374	-0,24414749057906	30	0,66920029267136	10,3075389750709	0	1 x 1	15 q26	insulin-like growth factor 1 receptor [Source:HGNC Symbol;Acc:HGNC:5465]
EFNA1	16	ENSG00000169242	EFNA1	0,118598358430098	0,181238596912029	0,665456709301731	-0,102899014396263	14	0,571265498710341	7,96626298901608	3,47388784405211e-13	3 x 1	1 q22	ephrin-A1 [Source:HGNC Symbol;Acc:HGNC:3221]
CHFR	17	ENSG00000072609	CHFR	0,178286776166412	0,230618754021087	0,658619445262159	-0,150366048121299	19	0,663939867375036	10,1621847052506	0	1 x 1	12 q24	checkpoint with forkhead and ring finger domains, E3 ubiquitin protein ligase [Source:HGNC Symbol;Acc:HGNC:20455]
ICA1	18	ENSG00000003147	ICA1	0,248308215051407	0,254097307037313	0,651311547730548	-0,21439139461657	25	0,519692734215609	6,96217316722832	7,27420346180452e-11	1 x 1	7 p21	islet cell autoantigen 1, 69kDa [Source:HGNC Symbol;Acc:HGNC:5343]
PODXL	19	ENSG00000128567	PODXL	0,271356421906138	0,258070800297658	0,650531837367045	-0,253248021985085	29	0,526084071406974	7,08028790608126	3,93604038251283e-11	1 x 1	7 q32	podocalyxin-like [Source:HGNC Symbol;Acc:HGNC:9171]
APBA1	20	ENSG00000107282	APBA1	0,230755607920478	0,2224314420497	0,648848459498069	-0,195687129887896	23	0,770868471311693	13,8509752083658	0	1 x 1	9 q21	amyloid beta (A4) precursor protein-binding, family A, member 1 [Source:HGNC Symbol;Acc:HGNC:578]
ROR1	21	ENSG00000185483	ROR1	0,276483393736588	0,319343579575574	0,638517759020305	-0,251173241160147	33	0,56157804787787	7,76815311767959	1,01763042437142e-12	1 x 1	1 p31	receptor tyrosine kinase-like orphan receptor 1 [Source:HGNC Symbol;Acc:HGNC:10256]
EPHB4	22	ENSG00000196411	EPHB4	0,315397268729973	0,250657791170893	0,630605341921656	-0,277943327011928	31	0,764421631667108	13,5706210903517	0	1 x 1	7 q22	EPH receptor B4 [Source:HGNC Symbol;Acc:HGNC:3395]
FZD7	23	ENSG00000155760	FZD7	0,312037441009318	0,334221878576714	0,629003464128527	-0,29175497889403	37	0,791715644389288	14,8334443348636	0	1 x 1	2 q33	frizzled class receptor 7 [Source:HGNC Symbol;Acc:HGNC:4045]
CDKN1C	24	ENSG00000129757	CDKN1C	0,27436597099429	0,244632312533098	0,626668273867865	-0,242689062873989	28	0,751912215156481	13,054009577111	0	1 x 1	11 p15	cyclin-dependent kinase inhibitor 1C (p57, Kip2) [Source:HGNC Symbol;Acc:HGNC:1786]
HLF	25	ENSG00000108924	HLF	0,326288348349257	0,30819385839944	0,624797284608137	-0,313155313010911	43	0,588376169331306	8,32844238956126	4,76285677564192e-14	1 x 1	17 q22	hepatic leukemia factor [Source:HGNC Symbol;Acc:HGNC:4977]
COL6A1	26	ENSG00000142156	COL6A1	0,202626597666601	0,190603363452479	0,621446732032647	-0,180368670686651	20	0,63287015188534	9,35544799153491	2,22044604925031e-16	1 x 1	NA	collagen, type VI, alpha 1 [Source:HGNC Symbol;Acc:HGNC:2211]
CSF1	27	ENSG00000184371	CSF1	0,260509234248987	0,252152083034045	0,617537224961539	-0,229464548643724	24	0,549468287990843	7,52704047874891	3,71724873104995e-12	1 x 1	1 p13	colony stimulating factor 1 (macrophage) [Source:HGNC Symbol;Acc:HGNC:2432]
IRAK3	28	ENSG00000090376	IRAK3	0,331719936321867	0,308916382027686	0,615612878715727	-0,300043028201566	38	0,589701708018917	8,35719158987614	4,06341627012807e-14	1 x 1	12 q14	interleukin-1 receptor-associated kinase 3 [Source:HGNC Symbol;Acc:HGNC:17020]
KIT	29	ENSG00000157404	KIT	0,299869659156557	0,269020043602825	0,61358140099382	-0,263648314181619	34	0,769116362685476	13,7737729995994	0	1 x 1	4 q12	v-kit Hardy-Zuckerman 4 feline sarcoma viral oncogene homolog [Source:HGNC Symbol;Acc:HGNC:6342]
MLLT4	30	ENSG00000130396	MLLT4	0,303807944778572	0,307877991496222	0,609643115371804	-0,285040148180828	37	0,516453612768677	6,9029278029039	9,88233939125394e-11	1 x 1	6 q27	myeloid/lymphoid or mixed-lineage leukemia (trithorax homolog, Drosophila); translocated to, 4 [Source:HGNC Symbol;Acc:HGNC:7137]
CDH3	31	ENSG00000062038	CDH3	0,205647644678067	0,172370569925459	0,600102059833211	-0,170771025116664	19	0,701634261682873	11,2703875350954	0	1 x 1	16 q22	cadherin 3, type 1, P-cadherin (placental) [Source:HGNC Symbol;Acc:HGNC:1762]
FGF5	32	ENSG00000138675	FGF5	0,331753860807611	0,294721157779733	0,59777666024502	-0,30216576268731	41	0,754428742088956	13,1551934637097	0	1 x 1	4 q21	fibroblast growth factor 5 [Source:HGNC Symbol;Acc:HGNC:3683]
ROR2	33	ENSG00000169071	ROR2	0,277425013837677	0,251032839683869	0,594138253455556	-0,254473504687301	31	0,844409913564254	18,0413605680229	0	1 x 1	9 q22	receptor tyrosine kinase-like orphan receptor 2 [Source:HGNC Symbol;Acc:HGNC:10257]
TFPI2	34	ENSG00000105825	TFPI2	0,255734390831977	0,241739443409776	0,590754424957497	-0,228403049862052	30	0,653319817854142	9,876851777562	0	1 x 1	7 q21	tissue factor pathway inhibitor 2 [Source:HGNC Symbol;Acc:HGNC:11761]
CCKBR	35	ENSG00000110148	CCKBR	0,284209816454633	0,222300759422265	0,589154882668174	-0,260751815056137	36	0,587391051419194	8,30714304065407	5,35127497869325e-14	1 x 1	11 p15	cholecystokinin B receptor [Source:HGNC Symbol;Acc:HGNC:1571]
FLT1	36	ENSG00000102755	FLT1	0,317270837997494	0,258707829250222	0,588446818769424	-0,290615139325815	38	0,712583351013596	11,6249073253005	0	1 x 1	NA	fms-related tyrosine kinase 1 [Source:HGNC Symbol;Acc:HGNC:3763]
LRP2	37	ENSG00000081479	LRP2	0,212901830454011	0,216577103276217	0,576191562340475	-0,194486193446492	22	0,574963425482432	8,04317428247153	2,28261853862932e-13	1 x 1	2 q31	low density lipoprotein receptor-related protein 2 [Source:HGNC Symbol;Acc:HGNC:6694]
GNMT	38	ENSG00000124713	GNMT	0,335731325218658	0,252978979252128	0,56230072966856	-0,29151052335149	41	0,529437657373954	7,14292354865151	2,83706391712713e-11	1 x 1	6 p21	glycine N-methyltransferase [Source:HGNC Symbol;Acc:HGNC:4415]
DAB2	39	ENSG00000153071	DAB2	0,375186555159845	0,300425169619943	0,555979528048175	-0,348970154780146	47	0,726882356164063	12,114165995661	0	1 x 1	5 p13	Dab, mitogen-responsive phosphoprotein, homolog 2 (Drosophila) [Source:HGNC Symbol;Acc:HGNC:2662]
CCNA1	40	ENSG00000133101	CCNA1	0,396715425054045	0,317876647672513	0,552638770810617	-0,375429460778356	52	0,752315658654328	13,0701418975451	0	1 x 1	NA	cyclin A1 [Source:HGNC Symbol;Acc:HGNC:1577]
INSR	41	ENSG00000171105	INSR	0,394932076119905	0,296261571769335	0,544502404581849	-0,354805054873038	46	0,691686373769695	10,9619693336462	0	1 x 1	19 p13	insulin receptor [Source:HGNC Symbol;Acc:HGNC:6091]
KCNQ1	42	ENSG00000053918	KCNQ1	0,302852815184823	0,225840042017912	0,54012113569237	-0,247207063129685	31	0,604802788880579	8,69223906198451	6,32827124036339e-15	1 x 1	11 p15	potassium voltage-gated channel, KQT-like subfamily, member 1 [Source:HGNC Symbol;Acc:HGNC:6294]
THBS1	43	ENSG00000137801	THBS1	0,295192087013681	0,238716877662814	0,507451910041457	-0,26457143845353	35	0,732574446927115	12,3179946164394	0	1 x 1	15 q14	thrombospondin 1 [Source:HGNC Symbol;Acc:HGNC:11785]
CYP1B1	44	ENSG00000138061	CYP1B1	0,342943443202998	0,230888294900572	0,501856992761914	-0,299665149852121	38	0,692806858981902	10,996091985381	0	1 x 1	2 p22	cytochrome P450, family 1, subfamily B, polypeptide 1 [Source:HGNC Symbol;Acc:HGNC:2597]
IGFBP7	45	ENSG00000163453	IGFBP7	0,428116172425867	0,258518073075832	0,493772086847315	-0,403953482338148	54	0,598572768242591	8,55230109299775	1,37667655053519e-14	1 x 1	4 q12	insulin-like growth factor binding protein 7 [Source:HGNC Symbol;Acc:HGNC:5476]
TGFBI	46	ENSG00000120708	TGFBI	0,431759590948593	0,260318479496972	0,488472443888499	-0,389191680981175	53	0,494467645339093	6,51112136760972	7,28050508769229e-10	1 x 1	5 q31	transforming growth factor, beta-induced, 68kDa [Source:HGNC Symbol;Acc:HGNC:11771]
BMP4	47	ENSG00000125378	BMP4	0,454304898224593	0,268173264077898	0,488357215685181	-0,4036146327271	52	0,613159751896775	8,88392272201599	2,22044604925031e-15	1 x 1	14 q22	bone morphogenetic protein 4 [Source:HGNC Symbol;Acc:HGNC:1071]
CEBPA	48	ENSG00000245848	CEBPA	0,357478493844037	0,238206141208296	0,477771075328895	-0,309454856312708	48	0,731806389722127	12,2901720576544	0	1 x 1	19 q13	CCAAT/enhancer binding protein (C/EBP), alpha [Source:HGNC Symbol;Acc:HGNC:1833]
APP	49	ENSG00000142192	APP	0,124725874225828	0,138992108673323	0,47732678820525	-0,100337160194499	9	0,764030239565436	13,5539227804478	0	1 x 2	NA	amyloid beta (A4) precursor protein [Source:HGNC Symbol;Acc:HGNC:620]
GJB2	50	ENSG00000165474	GJB2	0,228428672922683	0,193639682165441	0,468705299057268	-0,201306342905139	22	0,599042897124791	8,56277550331118	1,29896093881143e-14	1 x 2	NA	gap junction protein, beta 2, 26kDa [Source:HGNC Symbol;Acc:HGNC:4284]
NPY	51	ENSG00000122585	NPY	0,36292682668894	0,21396223309915	0,46764388095517	-0,313864243405732	48	0,723029914464907	11,9792346656714	0	1 x 1	7 p15	neuropeptide Y [Source:HGNC Symbol;Acc:HGNC:7955]
EPO	52	ENSG00000130427	EPO	0,316884145975352	0,203027930596302	0,467170921756477	-0,275004576569337	35	0,583419958951453	8,22185178542466	8,57092175010621e-14	1 x 1	7 q22	erythropoietin [Source:HGNC Symbol;Acc:HGNC:3415]
RIPK4	53	ENSG00000183421	RIPK4	0,329406428240743	0,215167413047381	0,466525485618906	-0,310324610582848	43	0,624196647540939	9,14444705498369	4,44089209850063e-16	1 x 1	NA	receptor-interacting serine-threonine kinase 4 [Source:HGNC Symbol;Acc:HGNC:496]
INHA	54	ENSG00000123999	INHA	0,406945827476068	0,266937015449167	0,464617439817165	-0,382343115522434	53	0,734576275709792	12,3909891142575	0	1 x 1	2 q35	inhibin, alpha [Source:HGNC Symbol;Acc:HGNC:6065]
FRZB	55	ENSG00000162998	FRZB	0,43373106147293	0,227372638254666	0,461233842161154	-0,379359047575687	63	0,650996946449917	9,8158259917328	0	1 x 1	2 q32	frizzled-related protein [Source:HGNC Symbol;Acc:HGNC:3959]
COL18A1	56	ENSG00000182871	COL18A1	0,490543824966231	0,248599636645412	0,460541807991162	-0,454322479991294	63	0,721937866215152	11,941415382016	0	1 x 1	NA	collagen, type XVIII, alpha 1 [Source:HGNC Symbol;Acc:HGNC:2195]
MT1A	57	ENSG00000205362	MT1A	0,373509762615392	0,198833335564261	0,457060945028719	-0,339214715848475	52	0,539254329894165	7,328978800699	1,06552544565375e-11	1 x 2	16 q13	metallothionein 1A [Source:HGNC Symbol;Acc:HGNC:7393]
ALK	58	ENSG00000171094	ALK	0,380229564954793	0,230578415740837	0,448854922451222	-0,357026617186623	51	0,688404973739233	10,8629074009038	0	1 x 1	2 p23	anaplastic lymphoma receptor tyrosine kinase [Source:HGNC Symbol;Acc:HGNC:427]
LOX	59	ENSG00000113083	LOX	0,504385552255941	0,303125299494199	0,439979790851829	-0,471232924791028	62	0,742727194825177	12,6956028620806	0	1 x 1	5 q23	lysyl oxidase [Source:HGNC Symbol;Acc:HGNC:6664]
GATA6	60	ENSG00000141448	GATA6	0,539851612901869	0,316861040619976	0,422982773313669	-0,519819016527183	71	0,733113905237085	12,337596939013	0	1 x 1	NA	GATA binding protein 6 [Source:HGNC Symbol;Acc:HGNC:4174]
IHH	61	ENSG00000163501	IHH	0,493162261347278	0,270252423875824	0,418931513840691	-0,453035240100411	66	0,791349678772862	14,815092394604	0	1 x 1	2 q35	indian hedgehog [Source:HGNC Symbol;Acc:HGNC:5956]
GDF10	62	ENSG00000266524	GDF10	0,451623487359291	0,201079956554526	0,401642067026674	-0,335767360692624	59	0,649956240989251	9,78864060559548	0	1 x 1	10 q11	growth differentiation factor 10 [Source:HGNC Symbol;Acc:HGNC:4215]
ERG	63	ENSG00000157554	ERG	0,587814328341116	0,328513386861909	0,386569791583696	-0,566056034253397	65	0,602925310394642	8,64980700683494	7,99360577730113e-15	1 x 1	NA	v-ets avian erythroblastosis virus E26 oncogene homolog [Source:HGNC Symbol;Acc:HGNC:3446]
RET	64	ENSG00000165731	RET	0,322015521984482	0,210148720805029	0,368981715659628	-0,294684181014557	50	0,74121215718022	12,638059658117	0	1 x 1	10 q11	ret proto-oncogene [Source:HGNC Symbol;Acc:HGNC:9967]
NOTCH3	65	ENSG00000074181	NOTCH3	0,607611236920073	0,264247744364305	0,343474396037321	-0,502410734639371	77	0,740804649983154	12,6226553831273	0	1 x 1	19 p13	notch 3 [Source:HGNC Symbol;Acc:HGNC:7883]
GRB10	66	ENSG00000106070	GRB10	0,608633338563052	0,217112923458839	0,332407566574793	-0,465339290898892	86	0,722639754825416	11,9657013358869	0	1 x 1	7 p12	growth factor receptor-bound protein 10 [Source:HGNC Symbol;Acc:HGNC:4564]
SCGB3A1	67	ENSG00000161055	SCGB3A1	0,648744213158074	0,24381326087308	0,309358648120122	-0,547783633102936	83	0,705013814682142	11,3780669507525	0	1 x 1	5 q35	secretoglobin, family 3A, member 1 [Source:HGNC Symbol;Acc:HGNC:18384]
TNK1	68	ENSG00000174292	TNK1	0,650629054672951	0,199370022848844	0,287330080164142	-0,507335007008791	90	0,601742428245499	8,62318932926981	9,32587340685131e-15	1 x 1	17 p13	tyrosine kinase, non-receptor, 1 [Source:HGNC Symbol;Acc:HGNC:11940]
