# Supplementary material for: Epigenetic Heterogeneity of B-Cell Lymphoma: DNA Methylation, Gene Expression and Chromatin States
Source: Genes (Basel). 2015 Sep 7;6(3):812–40. doi: 10.3390/genes6030812 (PMC4584331; doi:10.3390/genes6030812)
Supplement: Supplementary File 1 [file genes-06-00812-s003.xlsx]

## Sheet: Met Spot 1
	Rank	ID	Symbol	mean expression	SD	max delta e	min delta e	% high expressed	correlation	->t.score	->p.value	Metagene	Chromosome	Description
BMP6	1	ENSG00000153162	BMP6	0,123955833195489	0,239773938242491	0,9581483	0,013007855	13	0,635554039177599	9,42191346995922	1,11022302462516e-16	1 x 30	6 p24	bone morphogenetic protein 6 [Source:HGNC Symbol;Acc:HGNC:1073]
CAV2	2	ENSG00000105971	CAV2	0,236113652180451	0,299968142986134	0,9565415	0,01060583	38	0,635004492008068	9,40825782653829	1,11022302462516e-16	2 x 30	7 q31	caveolin 2 [Source:HGNC Symbol;Acc:HGNC:1528]
EPHB4	3	ENSG00000196411	EPHB4	0,306283412695489	0,266965197136564	0,9529617	0,0131314885	97	0,823815657526524	16,6338034288136	0	4 x 30	7 q22	EPH receptor B4 [Source:HGNC Symbol;Acc:HGNC:3395]
IGF1R	4	ENSG00000140443	IGF1R	0,278872335338346	0,287648375647674	0,9521133	0,01562441	58	0,714848376899444	11,7003484548472	0	4 x 30	15 q26	insulin-like growth factor 1 receptor [Source:HGNC Symbol;Acc:HGNC:5465]
SEZ6L	5	ENSG00000100095	SEZ6L	0,227518795526316	0,26427244865248	0,9500207	0,01181412	42	0,632418109787358	9,34430897526022	2,22044604925031e-16	2 x 30	NA	seizure related 6 homolog (mouse)-like [Source:HGNC Symbol;Acc:HGNC:10763]
DST	6	ENSG00000151914	DST	0,245853792368421	0,286145405886796	0,9496927	0,013935235	42	0,719885457788582	11,8708401867367	0	2 x 30	6 p12	dystonin [Source:HGNC Symbol;Acc:HGNC:1090]
ITGA2	7	ENSG00000164171	ITGA2	0,220153391639098	0,277639616251953	0,9488896	0,0104490795	38	0,341686912951131	4,16123417626713	2,84679555360157e-05	1 x 24	5 q11	integrin, alpha 2 (CD49B, alpha 2 subunit of VLA-2 receptor) [Source:HGNC Symbol;Acc:HGNC:6137]
CYP1A1	8	ENSG00000140465	CYP1A1	0,196177689473684	0,257198971805992	0,9464054	0,01144557	29	0,713961147926065	11,670708644714	0	1 x 30	15 q24	cytochrome P450, family 1, subfamily A, polypeptide 1 [Source:HGNC Symbol;Acc:HGNC:2595]
EPHB3	9	ENSG00000182580	EPHB3	0,244378319586466	0,27367914388733	0,94535375	0,011270675	47	0,783424075648717	14,4278015721406	0	2 x 30	3 q27	EPH receptor B3 [Source:HGNC Symbol;Acc:HGNC:3394]
FLT3	10	ENSG00000122025	FLT3	0,25059069443609	0,265924310436939	0,9427608	0,02365996	50	0,754018359423246	13,1386019116965	0	2 x 30	NA	fms-related tyrosine kinase 3 [Source:HGNC Symbol;Acc:HGNC:3765]
ABCB1	11	ENSG00000085563	ABCB1	0,163420357894737	0,265659271273071	0,9412693	0,01012102	23	0,631033476475817	9,31028825925469	2,22044604925031e-16	1 x 30	7 q21	ATP-binding cassette, sub-family B (MDR/TAP), member 1 [Source:HGNC Symbol;Acc:HGNC:40]
NTRK3	12	ENSG00000140538	NTRK3	0,259218238295739	0,299204626918361	0,9400244	0,01544911	44	0,716723706777039	11,763379276535	0	3 x 30	15 q25	neurotrophic tyrosine kinase, receptor, type 3 [Source:HGNC Symbol;Acc:HGNC:8033]
DLL1	13	ENSG00000275555	DLL1	0,21565676612782	0,227312619952309	0,93949785	0,03303815	37	0,440677642486029	5,61878180259677	5,5294761658331e-08	1 x 26	NA	delta-like 1 (Drosophila) [Source:HGNC Symbol;Acc:HGNC:2908]
PODXL	14	ENSG00000128567	PODXL	0,28946983762406	0,27443124183469	0,9389656	0,008867644	68	0,632984521544139	9,35826876444937	2,22044604925031e-16	5 x 30	7 q32	podocalyxin-like [Source:HGNC Symbol;Acc:HGNC:9171]
CD9	15	ENSG00000010278	CD9	0,23989831716792	0,199271531456837	0,9388651	0,02913375	65	0,497239228786442	6,55956049151222	5,70411717859542e-10	1 x 23	12 p13	CD9 molecule [Source:HGNC Symbol;Acc:HGNC:1709]
MME	16	ENSG00000196549	MME	0,255728369473684	0,265642334513131	0,93749835	0,03898501	52	0,256398521752807	3,03610882510738	0,00144602426971896	4 x 26	3 q25	membrane metallo-endopeptidase [Source:HGNC Symbol;Acc:HGNC:7154]
ETS2	17	ENSG00000157557	ETS2	0,238775570714286	0,307565262490828	0,93259275	0,017429005	34	0,597623462495095	8,53119261970704	1,55431223447522e-14	2 x 30	NA	v-ets avian erythroblastosis virus E26 oncogene homolog 2 [Source:HGNC Symbol;Acc:HGNC:3489]
APBA1	18	ENSG00000107282	APBA1	0,240832429210526	0,244111412128376	0,9309677	0,02978857	47	0,818879057360105	16,3293600858082	0	2 x 30	9 q21	amyloid beta (A4) precursor protein-binding, family A, member 1 [Source:HGNC Symbol;Acc:HGNC:578]
MLLT4	19	ENSG00000130396	MLLT4	0,298909819473684	0,314316910754468	0,9270859	0,01276655	62	0,623503094699876	9,12781849096835	5,55111512312578e-16	5 x 30	6 q27	myeloid/lymphoid or mixed-lineage leukemia (trithorax homolog, Drosophila); translocated to, 4 [Source:HGNC Symbol;Acc:HGNC:7137]
ROR1	20	ENSG00000185483	ROR1	0,275249547067669	0,318387510252637	0,9270655	0,02081235	42	0,520777187720758	6,98209998112981	6,56021903466808e-11	5 x 30	1 p31	receptor tyrosine kinase-like orphan receptor 1 [Source:HGNC Symbol;Acc:HGNC:10256]
CDKN1C	21	ENSG00000129757	CDKN1C	0,270780979808271	0,26593185263163	0,92674675	0,033670475	66	0,82874832431915	16,9497745371877	0	3 x 30	11 p15	cyclin-dependent kinase inhibitor 1C (p57, Kip2) [Source:HGNC Symbol;Acc:HGNC:1786]
ERBB3	22	ENSG00000065361	ERBB3	0,228359718195489	0,232917066507552	0,926514	0,01468471	46	0,661745436438894	10,1023526142074	0	1 x 30	12 q13	v-erb-b2 avian erythroblastic leukemia viral oncogene homolog 3 [Source:HGNC Symbol;Acc:HGNC:3431]
ESR1	23	ENSG00000091831	ESR1	0,23153578197995	0,243044702723651	0,922084233333333	0,01497115	43	0,610205637687634	8,81563124318838	3,10862446895044e-15	2 x 30	6 q25	estrogen receptor 1 [Source:HGNC Symbol;Acc:HGNC:3467]
PTPRG	24	ENSG00000144724	PTPRG	0,205599040977444	0,246201810937274	0,92147785	0,0155703685	38	0,439630655096416	5,60222939793483	5,97262250767727e-08	1 x 30	3 p14	protein tyrosine phosphatase, receptor type, G [Source:HGNC Symbol;Acc:HGNC:9671]
ACVR1C	25	ENSG00000123612	ACVR1C	0,199336003533835	0,204492911288799	0,92064575	0,01202514	38	0,642597735839788	9,59910139582459	0	1 x 30	2 q24	activin A receptor, type IC [Source:HGNC Symbol;Acc:HGNC:18123]
PEG10	26	ENSG00000242265	PEG10	0,242913137744361	0,203584922135532	0,9179844	0,01106958	65	0,452585016481157	5,80907119866347	2,25884368987295e-08	3 x 28	7 q21	paternally expressed 10 [Source:HGNC Symbol;Acc:HGNC:14005]
ICA1	27	ENSG00000003147	ICA1	0,250130519135338	0,267541059864255	0,9132993	0,019306815	48	0,617995513833322	8,99700749213251	1,11022302462516e-15	2 x 30	7 p21	islet cell autoantigen 1, 69kDa [Source:HGNC Symbol;Acc:HGNC:5343]
MEST	28	ENSG00000106484	MEST	0,231327959874687	0,227334750975933	0,912545466666667	0,02238742	45	0,451200106700239	5,78674282123237	2,51114962157573e-08	2 x 30	7 q32	mesoderm specific transcript [Source:HGNC Symbol;Acc:HGNC:7028]
MATK	29	ENSG00000007264	MATK	0,201631098458647	0,190845582876013	0,90763215	0,0095933445	41	0,629116026280783	9,26341998979657	2,22044604925031e-16	1 x 30	19 p13	megakaryocyte-associated tyrosine kinase [Source:HGNC Symbol;Acc:HGNC:6906]
TCF7L2	30	ENSG00000148737	TCF7L2	0,148087612736842	0,228206830584858	0,9058813	0,01289752	22	0,728883968276941	12,1852241552604	0	1 x 30	10 q25	transcription factor 7-like 2 (T-cell specific, HMG-box) [Source:HGNC Symbol;Acc:HGNC:11641]
EPS8	31	ENSG00000151491	EPS8	0,273921089774436	0,211788199489484	0,9024874	0,02661612	99	0,448259440372137	5,73950518894835	3,13938153251314e-08	5 x 27	12 p12	epidermal growth factor receptor pathway substrate 8 [Source:HGNC Symbol;Acc:HGNC:3420]
CSF1	32	ENSG00000184371	CSF1	0,265982272744361	0,267804874415825	0,89808025	0,034063605	60	0,705244542756666	11,385474123877	0	3 x 30	1 p13	colony stimulating factor 1 (macrophage) [Source:HGNC Symbol;Acc:HGNC:2432]
CHFR	33	ENSG00000072609	CHFR	0,190198317887218	0,250884927335783	0,8947946	0,01285327	27	0,683766163746322	10,7250221180842	0	1 x 30	12 q24	checkpoint with forkhead and ring finger domains, E3 ubiquitin protein ligase [Source:HGNC Symbol;Acc:HGNC:20455]
TIMP2	34	ENSG00000035862	TIMP2	0,193355560319549	0,206823707986682	0,8889436	0,0099846935	44	0,650117689258544	9,79285170294662	0	1 x 30	17 q25	TIMP metallopeptidase inhibitor 2 [Source:HGNC Symbol;Acc:HGNC:11821]
TFPI2	35	ENSG00000105825	TFPI2	0,268588569323308	0,268053235767104	0,887581333333333	0,0221920833333333	53	0,704573310162949	11,3639451620424	0	3 x 30	7 q21	tissue factor pathway inhibitor 2 [Source:HGNC Symbol;Acc:HGNC:11761]
YES1	36	ENSG00000176105	YES1	0,216281154266917	0,263505712586802	0,8840902	0,01237107	38	0,54691016166631	7,47699229787743	4,8553383535932e-12	1 x 30	NA	YES proto-oncogene 1, Src family tyrosine kinase [Source:HGNC Symbol;Acc:HGNC:12841]
COL6A1	37	ENSG00000142156	COL6A1	0,216514733033835	0,218208025075144	0,88161035	0,012833375	41	0,734610682354383	12,3922498208456	0	1 x 30	NA	collagen, type VI, alpha 1 [Source:HGNC Symbol;Acc:HGNC:2211]
KCNQ1	38	ENSG00000053918	KCNQ1	0,300047546879699	0,252407324108009	0,8754514	0,039278655	96	0,702185195772099	11,2878380802409	0	6 x 30	11 p15	potassium voltage-gated channel, KQT-like subfamily, member 1 [Source:HGNC Symbol;Acc:HGNC:6294]
CDH3	39	ENSG00000062038	CDH3	0,219620952142857	0,200945482917882	0,87073125	0,03598437	43	0,774872715301676	14,0303447801973	0	1 x 30	16 q22	cadherin 3, type 1, P-cadherin (placental) [Source:HGNC Symbol;Acc:HGNC:1762]
LRP2	40	ENSG00000081479	LRP2	0,226158111729323	0,235308366627583	0,8706821	0,01206898	50	0,693529961755587	11,0181941923623	0	1 x 30	2 q31	low density lipoprotein receptor-related protein 2 [Source:HGNC Symbol;Acc:HGNC:6694]
THY1	41	ENSG00000154096	THY1	0,224799803984962	0,172302942709667	0,863799	0,03847636	60	0,674230641710904	10,4491598875976	0	1 x 30	11 q23	Thy-1 cell surface antigen [Source:HGNC Symbol;Acc:HGNC:11801]
GP1BB	42	ENSG00000203618	GP1BB	0,254365105225564	0,207233884255573	0,85840455	0,02227245	67	0,60057459338544	8,59699751751427	1,0769163338864e-14	3 x 29	NA	glycoprotein Ib (platelet), beta polypeptide [Source:HGNC Symbol;Acc:HGNC:4440]
RARB	43	ENSG00000077092	RARB	0,263063718105263	0,207599736567754	0,84260845	0,011418608	68	0,507041121662283	6,73303593906359	2,36438868483901e-10	6 x 30	3 p24	retinoic acid receptor, beta [Source:HGNC Symbol;Acc:HGNC:9865]
HOXC6	44	ENSG00000197757	HOXC6	0,27991118481203	0,176866407090689	0,8385879	0,05476491	92	0,444954848327523	5,68669971640024	4,02467623672464e-08	5 x 26	12 q13	homeobox C6 [Source:HGNC Symbol;Acc:HGNC:5128]
FN1	45	ENSG00000115414	FN1	0,169910776466165	0,161514540320569	0,83770965	0,019355965	32	0,579362826029677	8,13563568149701	1,37667655053519e-13	1 x 27	2 q35	fibronectin 1 [Source:HGNC Symbol;Acc:HGNC:3778]
WNT1	46	ENSG00000125084	WNT1	0,199969409360902	0,157791209001094	0,82172205	0,02556249	41	0,595247545194915	8,47860636239771	2,07611705604904e-14	1 x 28	12 q13	wingless-type MMTV integration site family, member 1 [Source:HGNC Symbol;Acc:HGNC:12774]
EFNA1	47	ENSG00000169242	EFNA1	0,129594599236842	0,201275858081328	0,8049574	0,0087830525	19	0,627514341052613	9,22448465982891	3,33066907387547e-16	1 x 30	1 q22	ephrin-A1 [Source:HGNC Symbol;Acc:HGNC:3221]
DSP	48	ENSG00000096696	DSP	0,138243334575188	0,178557974532814	0,7953506	0,0153866755	18	0,671677121704046	10,3769429969675	0	1 x 30	6 p24	desmoplakin [Source:HGNC Symbol;Acc:HGNC:3052]
PDE1B	49	ENSG00000123360	PDE1B	0,177020821973684	0,215989235658741	0,793859	0,01499853	26	0,635218801006387	9,41358031773739	1,11022302462516e-16	1 x 30	12 q13	phosphodiesterase 1B, calmodulin-dependent [Source:HGNC Symbol;Acc:HGNC:8775]
GJB2	50	ENSG00000165474	GJB2	0,241103702431078	0,220085417048808	0,786821366666667	0,0151524133333333	54	0,774924404042136	14,0326874111873	0	2 x 30	NA	gap junction protein, beta 2, 26kDa [Source:HGNC Symbol;Acc:HGNC:4284]
PTPRO	51	ENSG00000151490	PTPRO	0,179927402921053	0,15168085809906	0,77887825	0,01432059	35	0,510054690672842	6,78706882569909	1,79339099126707e-10	1 x 27	12 p12	protein tyrosine phosphatase, receptor type, O [Source:HGNC Symbol;Acc:HGNC:9678]
APP	52	ENSG00000142192	APP	0,152343113947368	0,180350300479671	0,7490962	0,01253843	25	0,818987995359697	16,3359568773201	0	1 x 30	NA	amyloid beta (A4) precursor protein [Source:HGNC Symbol;Acc:HGNC:620]
FABP3	53	ENSG00000121769	FABP3	0,262983952744361	0,178708583001254	0,746352	0,032452685	78	0,495685286505522	6,5323695468947	6,5421545958344e-10	3 x 26	1 p35	fatty acid binding protein 3, muscle and heart (mammary-derived growth inhibitor) [Source:HGNC Symbol;Acc:HGNC:3557]
RASGRF1	54	ENSG00000058335	RASGRF1	0,231271216733083	0,192574847045329	0,7427536	0,011308444	55	0,722084953490941	11,9464983371297	0	2 x 30	15 q25	Ras protein-specific guanine nucleotide-releasing factor 1 [Source:HGNC Symbol;Acc:HGNC:9875]
IGFBP5	55	ENSG00000115461	IGFBP5	0,261312320266917	0,143025827460104	0,65423895	0,04306445	90	0,483807788281301	6,32723487266542	1,82412096538798e-09	4 x 24	2 q35	insulin-like growth factor binding protein 5 [Source:HGNC Symbol;Acc:HGNC:5474]
GUCY2D	56	ENSG00000132518	GUCY2D	0,226986205488722	0,160146484862553	0,62823955	0,02406576	56	0,642322672825077	9,59210556960187	0	1 x 29	17 p13	guanylate cyclase 2D, membrane (retina-specific) [Source:HGNC Symbol;Acc:HGNC:4689]
LAMB1	57	ENSG00000091136	LAMB1	0,224151793233083	0,15250377754576	0,5927417	0,0154711	59	0,640035507224392	9,53417806152726	0	1 x 28	7 q31	laminin, beta 1 [Source:HGNC Symbol;Acc:HGNC:6486]
BCAM	58	ENSG00000187244	BCAM	0,23907476574812	0,162212100030826	0,5905534	0,04243183	64	0,703712269875576	11,3364169893504	0	3 x 30	19 q13	basal cell adhesion molecule (Lutheran blood group) [Source:HGNC Symbol;Acc:HGNC:6722]
CDKN2A	59	ENSG00000147889	CDKN2A	0,173672252067669	0,168442697236052	0,51235138	0,015566485	34	0,527278160989872	7,10253737361309	3,50435236384783e-11	1 x 27	9 p21	cyclin-dependent kinase inhibitor 2A [Source:HGNC Symbol;Acc:HGNC:1787]
HIC1	60	ENSG00000177374	HIC1	0,233353830426065	0,112183964808618	0,490657446666667	0,0205925533333333	76	0,571972595138119	7,98091334827963	3,20743431814208e-13	1 x 23	17 p13	hypermethylated in cancer 1 [Source:HGNC Symbol;Acc:HGNC:4909]

## Sheet: Met Spot 2
	Rank	ID	Symbol	mean expression	SD	max delta e	min delta e	% high expressed	correlation	->t.score	->p.value	Metagene	Chromosome	Description
CCNA1	1	ENSG00000133101	CCNA1	0,394162963796993	0,321612378749689	0,95763735	0,01250397	100	0,768130138313561	13,7306528885502	0	16 x 30	NA	cyclin A1 [Source:HGNC Symbol;Acc:HGNC:1577]
TGFBI	2	ENSG00000120708	TGFBI	0,408321762932331	0,283621451370741	0,9482298	0,01393547	100	0,586840657328744	8,29526747660961	5,72875080706581e-14	18 x 30	5 q31	transforming growth factor, beta-induced, 68kDa [Source:HGNC Symbol;Acc:HGNC:11771]
INSR	3	ENSG00000171105	INSR	0,390390535112782	0,311751708772141	0,9474159	0,025596755	100	0,768683452422887	13,7548156042881	0	16 x 30	19 p13	insulin receptor [Source:HGNC Symbol;Acc:HGNC:6091]
DAB2	4	ENSG00000153071	DAB2	0,381100686729323	0,307776937150284	0,9462493	0,014411565	100	0,814030893939054	16,0410869917176	0	16 x 30	5 p13	Dab, mitogen-responsive phosphoprotein, homolog 2 (Drosophila) [Source:HGNC Symbol;Acc:HGNC:2662]
EPHA3	5	ENSG00000044524	EPHA3	0,381192488233083	0,298522995599972	0,9425789	0,039664825	100	0,703106682134032	11,3171151604994	0	15 x 30	3 p11	EPH receptor A3 [Source:HGNC Symbol;Acc:HGNC:3387]
BMP4	6	ENSG00000125378	BMP4	0,436133071729323	0,28519430077739	0,93880285	0,02972119	100	0,656081933482466	9,95005134021446	0	19 x 30	14 q22	bone morphogenetic protein 4 [Source:HGNC Symbol;Acc:HGNC:1071]
MLF1	7	ENSG00000178053	MLF1	0,423154491654135	0,238330298919724	0,93487395	0,01434336	100	0,680740004595331	10,6363936227132	0	18 x 30	3 q25	myeloid leukemia factor 1 [Source:HGNC Symbol;Acc:HGNC:7125]
SHH	8	ENSG00000164690	SHH	0,412261909048872	0,227157608242186	0,9254782	0,05875061	100	0,693864697546314	11,0284473582944	0	18 x 30	7 q36	sonic hedgehog [Source:HGNC Symbol;Acc:HGNC:10848]
IGFBP7	9	ENSG00000163453	IGFBP7	0,417711177556391	0,276587332284842	0,91910625	0,03087298	100	0,705129526856352	11,3817808149265	0	17 x 30	4 q12	insulin-like growth factor binding protein 7 [Source:HGNC Symbol;Acc:HGNC:5476]
NTSR1	10	ENSG00000101188	NTSR1	0,412404020488722	0,253867478274994	0,9171403	0,02387865	100	0,803452069018547	15,4457528330212	0	17 x 30	NA	neurotensin receptor 1 (high affinity) [Source:HGNC Symbol;Acc:HGNC:8039]
ALK	11	ENSG00000171094	ALK	0,39040119962406	0,25439206460695	0,91156795	0,01318767	100	0,79827215413058	15,1696650944255	0	16 x 30	2 p23	anaplastic lymphoma receptor tyrosine kinase [Source:HGNC Symbol;Acc:HGNC:427]
FRZB	12	ENSG00000162998	FRZB	0,427968084172932	0,244137309848159	0,9114939	0,03206813	100	0,805564054463752	15,5611252612955	0	18 x 30	2 q32	frizzled-related protein [Source:HGNC Symbol;Acc:HGNC:3959]
BMP2	13	ENSG00000125845	BMP2	0,378907093345865	0,261327625958396	0,9024634	0,017536295	100	0,850609364955429	18,5159817132856	0	15 x 30	NA	bone morphogenetic protein 2 [Source:HGNC Symbol;Acc:HGNC:1069]
COL1A2	14	ENSG00000164692	COL1A2	0,408650594160401	0,195643336385816	0,896916433333333	0,0507324633333333	100	0,665745781065325	10,2117755574027	0	19 x 30	7 q21	collagen, type I, alpha 2 [Source:HGNC Symbol;Acc:HGNC:2198]
INHA	15	ENSG00000123999	INHA	0,420460511804511	0,287018715147147	0,895533	0,01336056	100	0,853649486202751	18,7587673746414	0	17 x 30	2 q35	inhibin, alpha [Source:HGNC Symbol;Acc:HGNC:6065]
CEBPA	16	ENSG00000245848	CEBPA	0,368656102481203	0,265302154619738	0,88994095	0,02058285	100	0,824791797252978	16,695372126491	0	15 x 30	19 q13	CCAAT/enhancer binding protein (C/EBP), alpha [Source:HGNC Symbol;Acc:HGNC:1833]
MT1A	17	ENSG00000205362	MT1A	0,378829701829574	0,227645338886611	0,881247566666667	0,0177749366666667	100	0,693762002438487	11,0253002788573	0	16 x 30	16 q13	metallothionein 1A [Source:HGNC Symbol;Acc:HGNC:7393]
NPY	18	ENSG00000122585	NPY	0,370012680385965	0,245192574738551	0,881245466666667	0,0157761146666667	100	0,840593040953311	17,7618791883354	0	15 x 30	7 p15	neuropeptide Y [Source:HGNC Symbol;Acc:HGNC:7955]
TWIST1	19	ENSG00000122691	TWIST1	0,404647580877193	0,283494311626893	0,8800478	0,0306093166666667	100	0,739824724157768	12,5857391902677	0	16 x 30	7 p21	twist family bHLH transcription factor 1 [Source:HGNC Symbol;Acc:HGNC:12428]
ABO	20	ENSG00000175164	ABO	0,366868566766917	0,264919446262384	0,8717306	0,026424255	100	0,813376056789758	16,0029265719445	0	15 x 30	9 q34	ABO blood group (transferase A, alpha 1-3-N-acetylgalactosaminyltransferase; transferase B, alpha 1-3-galactosyltransferase) [Source:HGNC Symbol;Acc:HGNC:79]
FGF3	21	ENSG00000186895	FGF3	0,412139272781955	0,2691970111284	0,8647943	0,01608951	100	0,824320805276869	16,6656070482991	0	17 x 30	11 q13	fibroblast growth factor 3 [Source:HGNC Symbol;Acc:HGNC:3681]
ATP10A	22	ENSG00000206190	ATP10A	0,396070813421053	0,184861964551026	0,8565415	0,08996645	100	0,46439474063529	6,001660762837	8,98127039405949e-09	18 x 27	15 q12	ATPase, class V, type 10A [Source:HGNC Symbol;Acc:HGNC:13542]
TMEFF2	23	ENSG00000144339	TMEFF2	0,382428645233083	0,215741612363721	0,83272154	0,037247258	100	0,842853168676488	17,926247598441	0	16 x 30	2 q32	transmembrane protein with EGF-like and two follistatin-like domains 2 [Source:HGNC Symbol;Acc:HGNC:11867]
FLT4	24	ENSG00000037280	FLT4	0,374049669473684	0,215926980008418	0,80684625	0,020188615	100	0,835712801401249	17,4176064002631	0	15 x 30	5 q35	fms-related tyrosine kinase 4 [Source:HGNC Symbol;Acc:HGNC:3767]
ADCYAP1	25	ENSG00000141433	ADCYAP1	0,400043746766917	0,197643223470051	0,757407033333333	0,0236588233333333	100	0,795019503464938	15,0010816362085	0	18 x 30	NA	adenylate cyclase activating polypeptide 1 (pituitary) [Source:HGNC Symbol;Acc:HGNC:241]
TNFRSF10C	26	ENSG00000173535	TNFRSF10C	0,419218124761905	0,143705780866867	0,740955266666667	0,0595857666666667	100	0,477348207131961	6,21760726804062	3,13478942803869e-09	21 x 21	8 p21	tumor necrosis factor receptor superfamily, member 10c, decoy without an intracellular domain [Source:HGNC Symbol;Acc:HGNC:11906]

## Sheet: Met Spot 3
	Rank	ID	Symbol	mean expression	SD	max delta e	min delta e	% high expressed	correlation	->t.score	->p.value	Metagene	Chromosome	Description
ERG	1	ENSG00000157554	ERG	0,567471566315789	0,338697481781461	0,9747499	0,0201587	100	0,712195764634528	11,6120723976471	0	28 x 30	NA	v-ets avian erythroblastosis virus E26 oncogene homolog [Source:HGNC Symbol;Acc:HGNC:3446]
IGFBP1	2	ENSG00000146678	IGFBP1	0,676981363082707	0,235326844857064	0,97153805	0,0208008	100	0,467624144511954	6,05502548084786	6,93651958094677e-09	30 x 30	7 p12	insulin-like growth factor binding protein 1 [Source:HGNC Symbol;Acc:HGNC:5469]
DLK1	3	ENSG00000185559	DLK1	0,727021225413534	0,236921479792331	0,9683266	0,03292174	100	0,790202978226604	14,7578643111539	0	30 x 30	14 q32	delta-like 1 homolog (Drosophila) [Source:HGNC Symbol;Acc:HGNC:2907]
SOX2	4	ENSG00000181449	SOX2	0,479159694586466	0,34583412035179	0,9668998	0,01549708	100	0,636284094424761	9,44009171541501	1,11022302462516e-16	25 x 30	3 q26	SRY (sex determining region Y)-box 2 [Source:HGNC Symbol;Acc:HGNC:11195]
WT1	5	ENSG00000184937	WT1	0,562411413007519	0,292036440214962	0,9662601	0,0152271	100	0,829154026344379	16,9763120279682	0	28 x 30	11 p13	Wilms tumor 1 [Source:HGNC Symbol;Acc:HGNC:12796]
GAS7	6	ENSG00000007237	GAS7	0,635469669699248	0,276396277376029	0,9648568	0,02005462	100	0,860170254739642	19,3038501293841	0	29 x 30	17 p13	growth arrest-specific 7 [Source:HGNC Symbol;Acc:HGNC:4169]
CDH13	7	ENSG00000140945	CDH13	0,699443300112782	0,244201800987691	0,9644497	0,02547171	100	0,781137608768645	14,3195341279496	0	30 x 30	16 q23	cadherin 13 [Source:HGNC Symbol;Acc:HGNC:1753]
NTRK2	8	ENSG00000148053	NTRK2	0,483283635075188	0,351205493719009	0,96405395	0,014073615	100	0,724045598662606	12,0145782151158	0	25 x 30	9 q21	neurotrophic tyrosine kinase, receptor, type 2 [Source:HGNC Symbol;Acc:HGNC:8032]
SCGB3A1	9	ENSG00000161055	SCGB3A1	0,617324863421053	0,272674904134688	0,96124705	0,05004385	100	0,842224686947615	17,8802172282381	0	29 x 30	5 q35	secretoglobin, family 3A, member 1 [Source:HGNC Symbol;Acc:HGNC:18384]
DCC	10	ENSG00000187323	DCC	0,579957309849624	0,229323097924198	0,9610933	0,0323590366666667	100	0,759631171980243	13,3686800455898	0	29 x 30	NA	DCC netrin 1 receptor [Source:HGNC Symbol;Acc:HGNC:2701]
GATA6	11	ENSG00000141448	GATA6	0,526019578834586	0,320475329422605	0,9592226	0,01191709	100	0,82608230290741	16,7774867444381	0	26 x 30	NA	GATA binding protein 6 [Source:HGNC Symbol;Acc:HGNC:4174]
ERBB4	12	ENSG00000178568	ERBB4	0,49278817093985	0,327953956245444	0,95894345	0,015802035	100	0,899843871578461	23,6104949170455	0	26 x 30	2 q34	v-erb-b2 avian erythroblastic leukemia viral oncogene homolog 4 [Source:HGNC Symbol;Acc:HGNC:3432]
GSTM1	13	ENSG00000134184	GSTM1	0,710311253308271	0,163848231477374	0,95770675	0,160138075	100	0,372003683992284	4,58697847142562	5,19354002892491e-06	30 x 30	1 p13	glutathione S-transferase mu 1 [Source:HGNC Symbol;Acc:HGNC:4632]
TFAP2C	14	ENSG00000087510	TFAP2C	0,52413893112782	0,308390611377486	0,95613795	0,01593821	100	0,825558996957261	16,7440895720601	0	26 x 30	NA	transcription factor AP-2 gamma (activating enhancer binding protein 2 gamma) [Source:HGNC Symbol;Acc:HGNC:11744]
NOTCH3	15	ENSG00000074181	NOTCH3	0,574194608157895	0,291196974093117	0,9556467	0,06223995	100	0,756205589892057	13,2274455303635	0	28 x 30	19 p13	notch 3 [Source:HGNC Symbol;Acc:HGNC:7883]
EGFR	16	ENSG00000146648	EGFR	0,513794971766917	0,301008891756072	0,9551366	0,01555271	100	0,853981345443819	18,7856912631342	0	26 x 30	7 p11	epidermal growth factor receptor [Source:HGNC Symbol;Acc:HGNC:3236]
ONECUT2	17	ENSG00000119547	ONECUT2	0,568356185902256	0,284449854646987	0,9537365	0,02955361	100	0,754497015039235	13,1579571726729	0	28 x 30	NA	one cut homeobox 2 [Source:HGNC Symbol;Acc:HGNC:8139]
PDGFRA	18	ENSG00000134853	PDGFRA	0,554629719661654	0,235535665330032	0,9523138	0,02607172	100	0,684383016476435	10,743214875452	0	27 x 30	4 q12	platelet-derived growth factor receptor, alpha polypeptide [Source:HGNC Symbol;Acc:HGNC:8803]
SOX17	19	ENSG00000164736	SOX17	0,630838026090226	0,246825135146569	0,95027	0,0730848	100	0,690554404387016	10,9276510610734	0	30 x 30	8 q11	SRY (sex determining region Y)-box 17 [Source:HGNC Symbol;Acc:HGNC:18122]
ETV1	20	ENSG00000006468	ETV1	0,594654657030075	0,287108750938405	0,9479613	0,039606875	100	0,693219871170583	11,0087081932015	0	29 x 30	7 p21	ets variant 1 [Source:HGNC Symbol;Acc:HGNC:3490]
DAPK1	21	ENSG00000196730	DAPK1	0,611315909724311	0,272516906989254	0,947804866666667	0,0631872766666667	100	0,759406533350621	13,3593387374164	0	29 x 30	9 q21	death-associated protein kinase 1 [Source:HGNC Symbol;Acc:HGNC:2674]
TNK1	22	ENSG00000174292	TNK1	0,627277546315789	0,226742148715898	0,9476909	0,07272181	100	0,712881083804791	11,634781431483	0	30 x 30	17 p13	tyrosine kinase, non-receptor, 1 [Source:HGNC Symbol;Acc:HGNC:11940]
LOX	23	ENSG00000113083	LOX	0,49060667556391	0,310128765876517	0,9472994	0,01359625	100	0,78846229689459	14,6717795160895	0	25 x 30	5 q23	lysyl oxidase [Source:HGNC Symbol;Acc:HGNC:6664]
PLXDC2	24	ENSG00000120594	PLXDC2	0,528434311090226	0,307137614965752	0,9449864	0,015443065	100	0,871019452515289	20,29374704097	0	27 x 30	10 p12	plexin domain containing 2 [Source:HGNC Symbol;Acc:HGNC:21013]
TJP1	25	ENSG00000277401	TJP1	0,513875958458647	0,322102395199024	0,944301	0,015979945	100	0,836968917522505	17,5048691097167	0	26 x 30	NA	tight junction protein 1 [Source:HGNC Symbol;Acc:HGNC:11827]
SLIT2	26	ENSG00000145147	SLIT2	0,605234891353383	0,252395541852077	0,94406415	0,068243085	100	0,796073970571637	15,0553421780439	0	29 x 30	4 p15	slit homolog 2 (Drosophila) [Source:HGNC Symbol;Acc:HGNC:11086]
HTR1B	27	ENSG00000135312	HTR1B	0,656115763834586	0,2076696385078	0,9438246	0,09856073	100	0,786177000174133	14,560172711812	0	30 x 30	6 q14	5-hydroxytryptamine (serotonin) receptor 1B, G protein-coupled [Source:HGNC Symbol;Acc:HGNC:5287]
GRB10	28	ENSG00000106070	GRB10	0,582691018220551	0,243829934353295	0,943434033333333	0,0662923	100	0,84141303955084	17,8211424295419	0	28 x 30	7 p12	growth factor receptor-bound protein 10 [Source:HGNC Symbol;Acc:HGNC:4564]
WNT2	29	ENSG00000105989	WNT2	0,512231412255639	0,289159560560874	0,94219285	0,04116244	100	0,823452524938074	16,6110171915153	0	26 x 30	7 q31	wingless-type MMTV integration site family member 2 [Source:HGNC Symbol;Acc:HGNC:12780]
MYOD1	30	ENSG00000129152	MYOD1	0,635399303834586	0,207550249461709	0,9418311	0,13887575	100	0,787150256824983	14,6075099272171	0	30 x 30	11 p15	myogenic differentiation 1 [Source:HGNC Symbol;Acc:HGNC:7611]
BDNF	31	ENSG00000176697	BDNF	0,558202199473684	0,227256791797084	0,9405663	0,072572015	100	0,68302959515181	10,7033551446838	0	28 x 30	11 p14	brain-derived neurotrophic factor [Source:HGNC Symbol;Acc:HGNC:1033]
NEFL	32	ENSG00000277586	NEFL	0,708415576879699	0,191400151342648	0,94026905	0,19608185	100	0,748755283131785	12,9289292430706	0	30 x 30	8 p21	neurofilament, light polypeptide [Source:HGNC Symbol;Acc:HGNC:7739]
HOXB13	33	ENSG00000159184	HOXB13	0,487565858345865	0,282459100773845	0,9393312	0,029887325	100	0,730554298278247	12,2450313951343	0	25 x 30	17 q21	homeobox B13 [Source:HGNC Symbol;Acc:HGNC:5112]
NPR2	34	ENSG00000159899	NPR2	0,652414342293233	0,209176956427745	0,93616665	0,01797648	100	0,22807345525801	2,681082821518	0,00414117856551988	30 x 30	9 p13	natriuretic peptide receptor 2 [Source:HGNC Symbol;Acc:HGNC:7944]
RARRES1	35	ENSG00000118849	RARRES1	0,578298731203008	0,163309493200682	0,9356407	0,11656434	100	0,567476268806916	7,88819966298989	5,31130694980675e-13	30 x 28	3 q25	retinoic acid receptor responder (tazarotene induced) 1 [Source:HGNC Symbol;Acc:HGNC:9867]
SFRP1	36	ENSG00000104332	SFRP1	0,560781367481203	0,248922106496503	0,9346722	0,04582208	100	0,847315048222653	18,2604705757324	0	28 x 30	8 p11	secreted frizzled-related protein 1 [Source:HGNC Symbol;Acc:HGNC:10776]
GABRB3	37	ENSG00000166206	GABRB3	0,588406366503759	0,235612540880977	0,9345618	0,098460145	100	0,794524729895388	14,9757493745301	0	29 x 30	15 q12	gamma-aminobutyric acid (GABA) A receptor, beta 3 [Source:HGNC Symbol;Acc:HGNC:4083]
IGFBP3	38	ENSG00000146674	IGFBP3	0,515376437117794	0,242728292770556	0,934287933333333	0,0430397733333333	100	0,851774304518868	18,6082018039987	0	26 x 30	7 p12	insulin-like growth factor binding protein 3 [Source:HGNC Symbol;Acc:HGNC:5472]
ASCL1	39	ENSG00000139352	ASCL1	0,496556521090226	0,253211356165027	0,9335522	0,02051127	100	0,759757949367318	13,3739569122634	0	25 x 30	12 q23	achaete-scute family bHLH transcription factor 1 [Source:HGNC Symbol;Acc:HGNC:738]
CDH1	40	ENSG00000039068	CDH1	0,514349038233083	0,292313654869474	0,93316175	0,0123029	100	0,799357664965343	15,2267338153362	0	26 x 30	16 q22	cadherin 1, type 1, E-cadherin (epithelial) [Source:HGNC Symbol;Acc:HGNC:1748]
ISL1	41	ENSG00000016082	ISL1	0,571120877318296	0,252831317821539	0,932866033333333	0,0404251033333333	100	0,701763409671577	11,2744746498345	0	29 x 30	5 q11	ISL LIM homeobox 1 [Source:HGNC Symbol;Acc:HGNC:6132]
IHH	42	ENSG00000163501	IHH	0,480444788461153	0,288200091520131	0,931398933333333	0,0137479366666667	100	0,834897113797482	17,3614269011721	0	25 x 30	2 q35	indian hedgehog [Source:HGNC Symbol;Acc:HGNC:5956]
KDR	43	ENSG00000128052	KDR	0,54161290924812	0,274701942475787	0,9298565	0,036598035	100	0,85628366071896	18,9748372993796	0	27 x 30	4 q12	kinase insert domain receptor (a type III receptor tyrosine kinase) [Source:HGNC Symbol;Acc:HGNC:6307]
ASCL2	44	ENSG00000183734	ASCL2	0,654325563483709	0,236485054431863	0,9290878	0,08289462	100	0,811534941124871	15,8965943257228	0	30 x 30	11 p15	achaete-scute family bHLH transcription factor 2 [Source:HGNC Symbol;Acc:HGNC:739]
CDH11	45	ENSG00000140937	CDH11	0,589439319373434	0,225580283849781	0,928364966666667	0,0783778633333333	100	0,860811973296031	19,3593941551905	0	29 x 30	16 q21	cadherin 11, type 2, OB-cadherin (osteoblast) [Source:HGNC Symbol;Acc:HGNC:1750]
SOX1	46	ENSG00000182968	SOX1	0,609995968909774	0,246730407799892	0,92748395	0,07765755	100	0,804788881761759	15,5185856563597	0	29 x 30	NA	SRY (sex determining region Y)-box 1 [Source:HGNC Symbol;Acc:HGNC:11189]
CTSL	47	ENSG00000135047	CTSL	0,619193447406015	0,225973110606767	0,9266878	0,09658737	100	0,719422354822646	11,8550054799947	0	30 x 30	9 q21	cathepsin L [Source:HGNC Symbol;Acc:HGNC:2537]
GLI3	48	ENSG00000106571	GLI3	0,661675021691729	0,146887258308688	0,9258875	0,22954914	100	0,566063642946987	7,85928769632542	6,21280804580238e-13	30 x 30	7 p14	GLI family zinc finger 3 [Source:HGNC Symbol;Acc:HGNC:4319]
EPHA5	49	ENSG00000145242	EPHA5	0,600226745789474	0,16685151302421	0,92473035	0,274203845	100	0,786530773111041	14,5773465225759	0	30 x 30	4 q13	EPH receptor A5 [Source:HGNC Symbol;Acc:HGNC:3389]
HOXA9	50	ENSG00000078399	HOXA9	0,565883431027569	0,227156487200924	0,9247269	0,07632865	100	0,792692176632567	14,8826240896746	0	28 x 30	7 p15	homeobox A9 [Source:HGNC Symbol;Acc:HGNC:5109]
RAB32	51	ENSG00000118508	RAB32	0,577410906052632	0,250154196892936	0,9242484	0,04920163	100	0,794970795744514	14,9985842119154	0	29 x 30	6 q24	RAB32, member RAS oncogene family [Source:HGNC Symbol;Acc:HGNC:9772]
CTGF	52	ENSG00000118523	CTGF	0,62188785943609	0,146868367557727	0,9242384	0,134667315	100	0,626923558122073	9,21017220965369	3,33066907387547e-16	30 x 30	6 q23	connective tissue growth factor [Source:HGNC Symbol;Acc:HGNC:2500]
COL18A1	53	ENSG00000182871	COL18A1	0,476279774511278	0,275674812083343	0,92167235	0,038040025	100	0,812553162955806	15,9552273882992	0	25 x 30	NA	collagen, type XVIII, alpha 1 [Source:HGNC Symbol;Acc:HGNC:2195]
ZP3	54	ENSG00000188372	ZP3	0,52510545906015	0,168657119136164	0,9212445	0,03534694	100	0,478881017093523	6,24350128933836	2,75961342666164e-09	30 x 24	7 q11	zona pellucida glycoprotein 3 (sperm receptor) [Source:HGNC Symbol;Acc:HGNC:13189]
FGFR2	55	ENSG00000066468	FGFR2	0,574829487142857	0,229078249685642	0,920304	0,089193355	100	0,708730178754454	11,4982589302293	0	28 x 30	10 q26	fibroblast growth factor receptor 2 [Source:HGNC Symbol;Acc:HGNC:3689]
SLC5A8	56	ENSG00000256870	SLC5A8	0,593077177142857	0,23010808269278	0,9192506	0,12484941	100	0,738418309967877	12,533064951754	0	29 x 30	12 q23	solute carrier family 5 (sodium/monocarboxylate cotransporter), member 8 [Source:HGNC Symbol;Acc:HGNC:19119]
MEG3	57	ENSG00000214548	MEG3	0,696833154135338	0,140678076644662	0,91602585	0,26751865	100	0,608307675306291	8,77206509913688	3,99680288865056e-15	30 x 30	14 q32	maternally expressed 3 (non-protein coding) [Source:HGNC Symbol;Acc:HGNC:14575]
EYA4	58	ENSG00000112319	EYA4	0,502725360350877	0,237833310300471	0,9109317	0,04032474	100	0,853847719684542	18,7748399873671	0	26 x 30	6 q23	EYA transcriptional coactivator and phosphatase 4 [Source:HGNC Symbol;Acc:HGNC:3522]
PTGS2	59	ENSG00000073756	PTGS2	0,517766964135338	0,243920189715264	0,91059035	0,0296958	100	0,737712254010943	12,5067570349891	0	26 x 30	1 q31	prostaglandin-endoperoxide synthase 2 (prostaglandin G/H synthase and cyclooxygenase) [Source:HGNC Symbol;Acc:HGNC:9605]
CHGA	60	ENSG00000276781	CHGA	0,554346427443609	0,21564263449814	0,9079639	0,089572055	100	0,69159011309996	10,9590449622757	0	28 x 30	NA	chromogranin A (parathyroid secretory protein 1) [Source:HGNC Symbol;Acc:HGNC:1929]
PALM2-AKAP2	61	ENSG00000157654	PALM2-AKAP2	0,523751892218045	0,245185641647017	0,89828805	0,01706384	100	0,769767236108426	13,8023625527239	0	27 x 30	9 q31	PALM2-AKAP2 readthrough [Source:HGNC Symbol;Acc:HGNC:33529]
TUSC3	62	ENSG00000104723	TUSC3	0,603916240526316	0,217318610778723	0,8975102	0,03111317	100	0,753674940342712	13,1247450740424	0	30 x 30	8 p22	tumor suppressor candidate 3 [Source:HGNC Symbol;Acc:HGNC:30242]
DIO3	63	ENSG00000197406	DIO3	0,648032703057644	0,155344567572098	0,896623733333333	0,2264089	100	0,728104713090695	12,157481658507	0	30 x 30	14 q32	deiodinase, iodothyronine, type III [Source:HGNC Symbol;Acc:HGNC:2885]
PENK	64	ENSG00000181195	PENK	0,569473011353383	0,213997527918161	0,8962358	0,12020129	100	0,79993990773673	15,2575139597951	0	28 x 30	8 q12	proenkephalin [Source:HGNC Symbol;Acc:HGNC:8831]
EPHA7	65	ENSG00000135333	EPHA7	0,484940854135338	0,256839301745491	0,8957596	0,02630862	100	0,824679788094472	16,6882837076506	0	25 x 30	6 q16	EPH receptor A7 [Source:HGNC Symbol;Acc:HGNC:3390]
EPHA2	66	ENSG00000142627	EPHA2	0,599487501353383	0,177971722927126	0,8894824	0,03729909	100	0,436050305320142	5,54583868669097	7,75912052386474e-08	30 x 28	1 p36	EPH receptor A2 [Source:HGNC Symbol;Acc:HGNC:3386]
SLC22A3	67	ENSG00000146477	SLC22A3	0,634088580902256	0,155548477739053	0,887067833333333	0,236744053333333	100	0,776077070455147	14,0851122577904	0	30 x 30	6 q25	solute carrier family 22 (organic cation transporter), member 3 [Source:HGNC Symbol;Acc:HGNC:10967]
HRASLS	68	ENSG00000127252	HRASLS	0,514615957819549	0,165798430522786	0,88561235	0,14801362	100	0,558469237094353	7,70557944182869	1,42619249743348e-12	26 x 28	3 q29	HRAS-like suppressor [Source:HGNC Symbol;Acc:HGNC:14922]
SEMA3C	69	ENSG00000075223	SEMA3C	0,499632994548872	0,203684067933533	0,86898575	0,03035013	100	0,601355519062124	8,61450228620166	9,76996261670138e-15	25 x 30	7 q21	sema domain, immunoglobulin domain (Ig), short basic domain, secreted, (semaphorin) 3C [Source:HGNC Symbol;Acc:HGNC:10725]
HS3ST2	70	ENSG00000122254	HS3ST2	0,601984477819549	0,188906699844038	0,8653824	0,103931603333333	100	0,771218079277431	13,8664720515377	0	30 x 30	16 p12	heparan sulfate (glucosamine) 3-O-sulfotransferase 2 [Source:HGNC Symbol;Acc:HGNC:5195]
CALCA	71	ENSG00000110680	CALCA	0,547596837571429	0,168153980078131	0,864523133333333	0,0676353166666667	100	0,675396171720285	10,4823501906416	0	27 x 30	11 p15	calcitonin-related polypeptide alpha [Source:HGNC Symbol;Acc:HGNC:1437]
IGFBP2	72	ENSG00000115457	IGFBP2	0,504675973041353	0,251382072963872	0,86451755	0,0282745545	100	0,671161470026659	10,3624418946973	0	26 x 30	2 q35	insulin-like growth factor binding protein 2, 36kDa [Source:HGNC Symbol;Acc:HGNC:5471]
MMP14	73	ENSG00000157227	MMP14	0,533429809360902	0,205151790990028	0,85714835	0,074429015	100	0,347893040889025	4,24711730392267	2,0378124816478e-05	30 x 23	14 q11	matrix metallopeptidase 14 (membrane-inserted) [Source:HGNC Symbol;Acc:HGNC:7160]
MOS	74	ENSG00000172680	MOS	0,52409420839599	0,153473753844246	0,8296058	0,0244357533333333	100	0,642627964904437	9,59987061328625	0	27 x 28	8 q12	v-mos Moloney murine sarcoma viral oncogene homolog [Source:HGNC Symbol;Acc:HGNC:7199]
EPHA8	75	ENSG00000070886	EPHA8	0,548086573947368	0,159663805144752	0,8220123	0,098130055	100	0,526330046042445	7,08486640294128	3,8431147153517e-11	30 x 26	1 p36	EPH receptor A8 [Source:HGNC Symbol;Acc:HGNC:3391]
PITX2	76	ENSG00000164093	PITX2	0,476117139661654	0,183017576431376	0,80232645	0,056457465	100	0,535144143857246	7,2505790482716	1,61176627599957e-11	25 x 28	4 q25	paired-like homeodomain 2 [Source:HGNC Symbol;Acc:HGNC:9005]

## Sheet: Met Spot 4
	Rank	ID	Symbol	mean expression	SD	max delta e	min delta e	% high expressed	correlation	->t.score	->p.value	Metagene	Chromosome	Description
SGCE	1	ENSG00000127990	SGCE	0,495372062969925	0,119822047273982	0,8981932	0,16280553	100	0,419161631421931	5,28413118369307	2,5621123533881e-07	28 x 24	7 q21	sarcoglycan, epsilon [Source:HGNC Symbol;Acc:HGNC:10808]
FER	2	ENSG00000151422	FER	0,517502988759398	0,0490345911366762	0,8905644	0,471120435	100	0,268415363755633	3,18918698724318	0,000892569783346064	30 x 14	5 q21	fer (fps/fes related) tyrosine kinase [Source:HGNC Symbol;Acc:HGNC:3655]
NKX3-1	3	ENSG00000167034	NKX3-1	0,498027847857143	0,0730859975889058	0,84955825	0,204984495	100	0,235634262776364	2,77509919152395	0,00316313775615817	30 x 12	8 p21	NK3 homeobox 1 [Source:HGNC Symbol;Acc:HGNC:7838]
PPAT	4	ENSG00000128059	PPAT	0,473882037593985	0,141060768707894	0,7898095	0,02929087	100	0,231405803077377	2,72245522031163	0,00368123436716017	27 x 22	4 q12	phosphoribosyl pyrophosphate amidotransferase [Source:HGNC Symbol;Acc:HGNC:9238]
DES	5	ENSG00000175084	DES	0,463146940639098	0,104478652038061	0,74456605	0,11502315	100	0,393676266232056	4,90164263087585	1,37965673940865e-06	28 x 10	2 q35	desmin [Source:HGNC Symbol;Acc:HGNC:2770]

## Sheet: Met Spot 5
	Rank	ID	Symbol	mean expression	SD	max delta e	min delta e	% high expressed	correlation	->t.score	->p.value	Metagene	Chromosome	Description
BCL2A1	1	ENSG00000140379	BCL2A1	0,808992861879699	0,227401511160318	0,9887749	0,08878504	100	0,572365487591052	7,98906512368223	3,06754621703931e-13	30 x 1	15 q25	BCL2-related protein A1 [Source:HGNC Symbol;Acc:HGNC:991]
SERPINB5	2	ENSG00000206075	SERPINB5	0,863939911278195	0,168028686558445	0,9875265	0,1406123	100	0,621277292201436	9,07469015240003	6,66133814775094e-16	30 x 1	NA	serpin peptidase inhibitor, clade B (ovalbumin), member 5 [Source:HGNC Symbol;Acc:HGNC:8949]
OGG1	3	ENSG00000114026	OGG1	0,576350341503759	0,264609845808074	0,9863788	0,03121421	100	0,341521694967009	4,15895632255001	2,87197014052776e-05	30 x 5	3 p25	8-oxoguanine DNA glycosylase [Source:HGNC Symbol;Acc:HGNC:8125]
XRCC2	4	ENSG00000196584	XRCC2	0,951115093984962	0,0767193212301561	0,9861381	0,4121818	100	0,321350561302254	3,88403322912222	8,11176636136279e-05	30 x 1	7 q36	X-ray repair complementing defective repair in Chinese hamster cells 2 [Source:HGNC Symbol;Acc:HGNC:12829]
TGFB1	5	ENSG00000105329	TGFB1	0,856677018796992	0,163606041767357	0,9857224	0,2756369	100	0,390922660801791	4,86114730735904	1,64136509073209e-06	30 x 1	19 q13	transforming growth factor, beta 1 [Source:HGNC Symbol;Acc:HGNC:11766]
ACVR1	6	ENSG00000115170	ACVR1	0,874493722180451	0,111497524779486	0,9827695	0,26672175	100	0,442450978549085	5,64688245358169	4,84973603498418e-08	30 x 1	2 q24	activin A receptor, type I [Source:HGNC Symbol;Acc:HGNC:171]
XRCC1	7	ENSG00000073050	XRCC1	0,916725813533835	0,0855063018916104	0,982695	0,4883106	100	0,128940468844903	1,48821423251131	0,0695488513732205	30 x 1	19 q13	X-ray repair complementing defective repair in Chinese hamster cells 1 [Source:HGNC Symbol;Acc:HGNC:12828]
UGT1A7	8	ENSG00000244122	UGT1A7	0,96191312556391	0,0264973081078536	0,9822065	0,7572897	100	0,332001607645971	4,0284293492611	4,73045660467353e-05	30 x 1	2 q37	UDP glucuronosyltransferase 1 family, polypeptide A7 [Source:HGNC Symbol;Acc:HGNC:12539]
AFP	9	ENSG00000081051	AFP	0,770379900601504	0,215263687082244	0,9808573	0,08025518	100	0,640091578814027	9,53559303647085	0	30 x 1	4 q13	alpha-fetoprotein [Source:HGNC Symbol;Acc:HGNC:317]
MMP1	10	ENSG00000196611	MMP1	0,941410417669173	0,0581272096663649	0,9808454	0,661304	100	0,373906637279925	4,61424511999331	4,64027774427223e-06	30 x 1	11 q22	matrix metallopeptidase 1 (interstitial collagenase) [Source:HGNC Symbol;Acc:HGNC:7155]
PRSS8	11	ENSG00000052344	PRSS8	0,866236345112782	0,133621763094898	0,9807997	0,2244745	100	0,511108255368018	6,8060385160989	1,62715840801297e-10	30 x 1	16 p11	protease, serine, 8 [Source:HGNC Symbol;Acc:HGNC:9491]
IL3	12	ENSG00000164399	IL3	0,907084687969925	0,0918617672577027	0,980175	0,5201026	100	0,43373227467629	5,50950335748835	9,17693121493812e-08	30 x 1	5 q31	interleukin 3 [Source:HGNC Symbol;Acc:HGNC:6011]
MKRN3	13	ENSG00000179455	MKRN3	0,912804707142857	0,100162932186418	0,9801012	0,27418955	100	0,207658536564791	2,42972525292401	0,00823264588340766	30 x 1	15 q11	makorin ring finger protein 3 [Source:HGNC Symbol;Acc:HGNC:7114]
IL1A	14	ENSG00000115008	IL1A	0,961478801503759	0,0197509606602035	0,980023	0,8367031	100	0,231255777294693	2,72059042909962	0,00370092459044424	30 x 1	2 q14	interleukin 1, alpha [Source:HGNC Symbol;Acc:HGNC:5991]
ZIM3	15	ENSG00000141946	ZIM3	0,924016818546366	0,0818339907702706	0,979738466666667	0,343954466666667	100	0,244599584608792	2,88727351765678	0,00227365845679595	30 x 1	19 q13	zinc finger, imprinted 3 [Source:HGNC Symbol;Acc:HGNC:16366]
TM7SF3	16	ENSG00000064115	TM7SF3	0,775986576691729	0,23035814693802	0,9793255	0,1565485	100	0,520088805570015	6,96944561255831	7,00515201401686e-11	30 x 1	12 p11	transmembrane 7 superfamily member 3 [Source:HGNC Symbol;Acc:HGNC:23049]
ABCC2	17	ENSG00000023839	ABCC2	0,908679995	0,106068908440813	0,97880065	0,49754495	100	0,343876370837612	4,19146152895761	2,53210917171565e-05	30 x 1	10 q24	ATP-binding cassette, sub-family C (CFTR/MRP), member 2 [Source:HGNC Symbol;Acc:HGNC:53]
IL13	18	ENSG00000169194	IL13	0,920049992481203	0,0926454436393358	0,9785677	0,2745118	100	0,281605259103162	3,3590594976725	0,000512286809170703	30 x 1	5 q31	interleukin 13 [Source:HGNC Symbol;Acc:HGNC:5973]
CD1A	19	ENSG00000158477	CD1A	0,921006882706767	0,0710538558764945	0,97766025	0,5398907	100	0,249931706228889	2,95436027905762	0,00185786687380962	30 x 1	1 q23	CD1a molecule [Source:HGNC Symbol;Acc:HGNC:1634]
FOLR1	20	ENSG00000110195	FOLR1	0,871522548120301	0,126701879917142	0,9762292	0,1818943	100	0,529209849106783	7,13865409241266	2,90119039902947e-11	30 x 1	11 q13	folate receptor 1 (adult) [Source:HGNC Symbol;Acc:HGNC:3791]
S100A12	21	ENSG00000163221	S100A12	0,758070015789474	0,14314631662975	0,9759131	0,175144	100	0,545554593065493	7,45059282888315	5,58841861675319e-12	30 x 1	1 q21	S100 calcium binding protein A12 [Source:HGNC Symbol;Acc:HGNC:10489]
NTRK1	22	ENSG00000198400	NTRK1	0,646981798947368	0,330794344141682	0,9755809	0,08905806	100	0,126165412503688	1,45566101836069	0,0739393358576215	30 x 3	1 q23	neurotrophic tyrosine kinase, receptor, type 1 [Source:HGNC Symbol;Acc:HGNC:8031]
FGR	23	ENSG00000000938	FGR	0,712734767744361	0,264048445043819	0,9754314	0,06176543	100	0,47073824311335	6,10677867306123	5,39319455761245e-09	30 x 1	1 p35	FGR proto-oncogene, Src family tyrosine kinase [Source:HGNC Symbol;Acc:HGNC:3697]
MAP3K8	24	ENSG00000107968	MAP3K8	0,564072018345865	0,271061942729148	0,9754103	0,04608908	100	0,610740586188775	8,82795409828576	2,88657986402541e-15	27 x 1	10 p11	mitogen-activated protein kinase kinase kinase 8 [Source:HGNC Symbol;Acc:HGNC:6860]
FGF6	25	ENSG00000111241	FGF6	0,933546442857143	0,04550508362895	0,9753089	0,6251004	100	0,142669823523715	1,64980774285801	0,0506890324186526	30 x 1	12 p13	fibroblast growth factor 6 [Source:HGNC Symbol;Acc:HGNC:3684]
DCN	26	ENSG00000011465	DCN	0,907514937593985	0,124393482361853	0,9752086	0,155371	100	0,371148876078928	4,57475215976677	5,46182864058498e-06	30 x 1	12 q21	decorin [Source:HGNC Symbol;Acc:HGNC:2705]
HSPA2	27	ENSG00000126803	HSPA2	0,845210730075188	0,162034658344382	0,9749159	0,1353031	100	0,593923517526876	8,44945138806023	2,44249065417534e-14	30 x 1	14 q23	heat shock 70kDa protein 2 [Source:HGNC Symbol;Acc:HGNC:5235]
TGFB3	28	ENSG00000119699	TGFB3	0,925455598496241	0,0812174807026666	0,9744159	0,1962814	100	0,359061635690788	4,40328648583411	1,09671173067483e-05	30 x 1	14 q24	transforming growth factor, beta 3 [Source:HGNC Symbol;Acc:HGNC:11769]
SERPINB2	29	ENSG00000197632	SERPINB2	0,845543361654135	0,141657300697006	0,974094	0,3306006	100	0,708650995996067	11,495678219296	0	30 x 1	NA	serpin peptidase inhibitor, clade B (ovalbumin), member 2 [Source:HGNC Symbol;Acc:HGNC:8584]
TNFRSF1A	30	ENSG00000067182	TNFRSF1A	0,778224239097744	0,201200549809681	0,973761	0,1912946	100	0,505101659719923	6,69843777565128	2,82072143420464e-10	30 x 1	12 p13	tumor necrosis factor receptor superfamily, member 1A [Source:HGNC Symbol;Acc:HGNC:11916]
ALOX12	31	ENSG00000108839	ALOX12	0,84223555943609	0,150417614370611	0,9733855	0,2230976	100	-0,412190722635703	-5,17808249751628	0,999999588253384	30 x 1	17 p13	arachidonate 12-lipoxygenase [Source:HGNC Symbol;Acc:HGNC:429]
GABRG3	32	ENSG00000182256	GABRG3	0,69059429537594	0,182763454703679	0,9723388	0,19292675	100	0,568739280349265	7,91413646688311	4,61297666731753e-13	30 x 1	15 q12	gamma-aminobutyric acid (GABA) A receptor, gamma 3 [Source:HGNC Symbol;Acc:HGNC:4088]
MAS1	33	ENSG00000130368	MAS1	0,869797582330827	0,110989796373502	0,97231505	0,46175355	100	0,610868174627754	8,83089601828769	2,88657986402541e-15	30 x 1	6 q25	MAS1 proto-oncogene, G protein-coupled receptor [Source:HGNC Symbol;Acc:HGNC:6899]
IL2	34	ENSG00000109471	IL2	0,661762103157895	0,229353462102803	0,9720793	0,08356746	100	0,595027182324806	8,47374659589177	2,1316282072803e-14	29 x 1	4 q27	interleukin 2 [Source:HGNC Symbol;Acc:HGNC:6001]
MAPK10	35	ENSG00000109339	MAPK10	0,871917312030075	0,0924323004083497	0,9717412	0,4638481	100	0,175154300651095	2,03621038800543	0,0218724278007045	30 x 1	4 q21	mitogen-activated protein kinase 10 [Source:HGNC Symbol;Acc:HGNC:6872]
CSF1R	36	ENSG00000182578	CSF1R	0,75176402406015	0,204092287034153	0,971717	0,0772524	100	0,708343789801484	11,4856740615046	0	30 x 1	5 q32	colony stimulating factor 1 receptor [Source:HGNC Symbol;Acc:HGNC:2433]
GNG7	37	ENSG00000176533	GNG7	0,855989776691729	0,112530805450805	0,97146505	0,54599295	100	0,670732927104271	10,3504112863578	0	30 x 1	19 p13	guanine nucleotide binding protein (G protein), gamma 7 [Source:HGNC Symbol;Acc:HGNC:4410]
NID1	38	ENSG00000116962	NID1	0,823138204511278	0,175979731991039	0,97131	0,1468757	100	0,537506172474351	7,2955443046571	1,27147181672171e-11	30 x 1	1 q42	nidogen 1 [Source:HGNC Symbol;Acc:HGNC:7821]
NNAT	39	ENSG00000053438	NNAT	0,891241455639098	0,0929192221010331	0,9711664	0,419884	100	-0,0482093328289439	-0,552423362552574	0,709200174330181	30 x 1	NA	neuronatin [Source:HGNC Symbol;Acc:HGNC:7860]
APOA1	40	ENSG00000118137	APOA1	0,715669683007519	0,216892229691343	0,97079515	0,097930295	100	0,781646068316806	14,3434812665927	0	30 x 1	11 q23	apolipoprotein A-I [Source:HGNC Symbol;Acc:HGNC:600]
EDNRB	41	ENSG00000136160	EDNRB	0,754212479736842	0,162866583309694	0,97022035	0,3500555	100	0,675797256400585	10,49380504808	0	30 x 1	NA	endothelin receptor type B [Source:HGNC Symbol;Acc:HGNC:3180]
AGXT	42	ENSG00000172482	AGXT	0,738172139548872	0,173372037589011	0,96997015	0,2794936	100	0,788961685483789	14,6963804554247	0	30 x 1	2 q37	alanine-glyoxylate aminotransferase [Source:HGNC Symbol;Acc:HGNC:341]
PEG3	43	ENSG00000198300	PEG3	0,701457637669173	0,119045702117422	0,9687669	0,05807561	100	0,00505525190933588	0,0578607420551554	0,476973859670002	30 x 1	19 q13	paternally expressed 3 [Source:HGNC Symbol;Acc:HGNC:8826]
SIN3B	44	ENSG00000127511	SIN3B	0,766463552932331	0,160223347817608	0,9685999	0,135697105	100	0,669455295160559	10,3146555516051	0	30 x 1	19 p13	SIN3 transcription regulator family member B [Source:HGNC Symbol;Acc:HGNC:19354]
GPR116	45	ENSG00000069122	GPR116	0,785060768421053	0,157992157853438	0,9683598	0,3244343	100	0,75954160319585	13,3649540883674	0	30 x 1	6 p12	G protein-coupled receptor 116 [Source:HGNC Symbol;Acc:HGNC:19030]
LCN2	46	ENSG00000148346	LCN2	0,793285609097744	0,17991896821328	0,9675672	0,1449553	100	0,694454163665357	11,046536611787	0	30 x 1	9 q34	lipocalin 2 [Source:HGNC Symbol;Acc:HGNC:6526]
KIAA0125	47	ENSG00000226777	KIAA0125	0,821779019548872	0,141140502259708	0,9670535	0,1794433	100	0,431801399793229	5,47933965729396	1,05437749198245e-07	30 x 1	14 q32	KIAA0125 [Source:HGNC Symbol;Acc:HGNC:19955]
PIK3R1	48	ENSG00000145675	PIK3R1	0,91205667443609	0,0397634051025575	0,9668467	0,7583554	100	0,344346666264712	4,19796444978051	2,4689102937403e-05	30 x 1	5 q13	phosphoinositide-3-kinase, regulatory subunit 1 (alpha) [Source:HGNC Symbol;Acc:HGNC:8979]
RIPK1	49	ENSG00000137275	RIPK1	0,749770844360902	0,18825687598134	0,9667326	0,1381385	100	0,525817302870097	7,07532513503898	4,03928002157272e-11	30 x 1	6 p25	receptor (TNFRSF)-interacting serine-threonine kinase 1 [Source:HGNC Symbol;Acc:HGNC:10019]
LIMK1	50	ENSG00000106683	LIMK1	0,808923499699248	0,189101007967029	0,9660313	0,09790786	100	0,611977258069108	8,85651547758537	2,44249065417534e-15	30 x 1	7 q11	LIM domain kinase 1 [Source:HGNC Symbol;Acc:HGNC:6613]
ITK	51	ENSG00000113263	ITK	0,736564571842105	0,191327878688978	0,96579575	0,095398945	100	0,440005058653448	5,60814529229731	5,81038790414823e-08	30 x 1	5 q33	IL2-inducible T-cell kinase [Source:HGNC Symbol;Acc:HGNC:6171]
WEE1	52	ENSG00000166483	WEE1	0,653064536390977	0,264416223626418	0,9655802	0,06598216	100	0,659599152606998	10,0442801742935	0	29 x 1	11 p15	WEE1 G2 checkpoint kinase [Source:HGNC Symbol;Acc:HGNC:12761]
ARHGAP9	53	ENSG00000123329	ARHGAP9	0,881282239849624	0,109762841548718	0,9653732	0,2803308	100	0,235785981614858	2,77699115649228	0,00314581864024577	30 x 1	12 q13	Rho GTPase activating protein 9 [Source:HGNC Symbol;Acc:HGNC:14130]
TIMP3	54	ENSG00000100234	TIMP3	0,792487081804511	0,109841066705616	0,965240633333333	0,42089014	100	-0,111896354890263	-1,28880617305768	0,900131593518455	30 x 1	NA	TIMP metallopeptidase inhibitor 3 [Source:HGNC Symbol;Acc:HGNC:11822]
CYP2E1	55	ENSG00000130649	CYP2E1	0,849802632706767	0,116185586110722	0,9633949	0,46720215	100	0,599281188447162	8,56808987497463	1,26565424807268e-14	30 x 1	10 q26	cytochrome P450, family 2, subfamily E, polypeptide 1 [Source:HGNC Symbol;Acc:HGNC:2631]
CREBBP	56	ENSG00000005339	CREBBP	0,809525070676692	0,168051974585376	0,9632065	0,2133635	100	0,243135422784547	2,86890107704588	0,00240154917227375	30 x 1	16 p13	CREB binding protein [Source:HGNC Symbol;Acc:HGNC:2348]
ASB4	57	ENSG00000005981	ASB4	0,780699831904762	0,123486196053302	0,9618615	0,429433533333333	100	0,778205055888718	14,18283186611	0	30 x 1	7 q21	ankyrin repeat and SOCS box containing 4 [Source:HGNC Symbol;Acc:HGNC:16009]
ABCB4	58	ENSG00000005471	ABCB4	0,780100279448622	0,135573967375757	0,961393533333333	0,283735333333333	100	0,668943748525891	10,3003860291448	0	30 x 1	7 q21	ATP-binding cassette, sub-family B (MDR/TAP), member 4 [Source:HGNC Symbol;Acc:HGNC:45]
GLI2	59	ENSG00000074047	GLI2	0,852192761278196	0,0999055124693501	0,9602519	0,39311235	100	0,646383970207448	9,69604649045379	0	30 x 1	2 q14	GLI family zinc finger 2 [Source:HGNC Symbol;Acc:HGNC:4318]
THPO	60	ENSG00000090534	THPO	0,646956564511278	0,183632867322837	0,95988375	0,11890155	100	0,740028748266239	12,5934106351224	0	29 x 1	3 q27	thrombopoietin [Source:HGNC Symbol;Acc:HGNC:11795]
MAGEL2	61	ENSG00000254585	MAGEL2	0,844484542142857	0,0777999999162638	0,95953715	0,501213705	100	0,249400441369453	2,9476633774942	0,00189598798532464	30 x 1	15 q11	MAGE-like 2 [Source:HGNC Symbol;Acc:HGNC:6814]
MAPK9	62	ENSG00000050748	MAPK9	0,907621315037594	0,0642758152904877	0,9594816	0,4843391	100	0,450364923469835	5,77330287535501	2,67612643156667e-08	30 x 1	5 q35	mitogen-activated protein kinase 9 [Source:HGNC Symbol;Acc:HGNC:6886]
BCR	63	ENSG00000186716	BCR	0,605479633909774	0,275729920828599	0,9592821	0,019175435	100	0,555756046874836	7,65135466134877	1,90947258005281e-12	28 x 2	NA	breakpoint cluster region [Source:HGNC Symbol;Acc:HGNC:1014]
TFF2	64	ENSG00000160181	TFF2	0,759506291766917	0,179418317442527	0,9592697	0,135302085	100	0,728497267905611	12,1714445358781	0	30 x 1	NA	trefoil factor 2 [Source:HGNC Symbol;Acc:HGNC:11756]
GML	65	ENSG00000104499	GML	0,809061692293233	0,151069398338203	0,95924235	0,35668205	100	0,39038667946135	4,85328298738994	1,69749877709791e-06	30 x 1	8 q24	glycosylphosphatidylinositol anchored molecule like [Source:HGNC Symbol;Acc:HGNC:4375]
DSC2	66	ENSG00000134755	DSC2	0,807466027255639	0,11758447373232	0,9591554	0,31917595	100	-0,141708952384868	-1,63846791269958	0,948138122457915	30 x 1	NA	desmocollin 2 [Source:HGNC Symbol;Acc:HGNC:3036]
ERCC3	67	ENSG00000163161	ERCC3	0,783135667669173	0,18836857371661	0,9591278	0,2283542	100	0,683719368607005	10,7236437599381	0	30 x 1	2 q14	excision repair cross-complementation group 3 [Source:HGNC Symbol;Acc:HGNC:3435]
CHD2	68	ENSG00000279765	CHD2	0,795472981578947	0,128682451495243	0,95814625	0,34224015	100	0,62650248720951	9,19998722726092	4,44089209850063e-16	30 x 1	15 q26	chromodomain helicase DNA binding protein 2 [Source:HGNC Symbol;Acc:HGNC:1917]
LY6G6E	69	ENSG00000206401	LY6G6E	0,695265902406015	0,261274502432276	0,9576917	0,04920758	100	0,567219815807294	7,88294327674269	5,46451772720502e-13	30 x 1	NA	lymphocyte antigen 6 complex, locus G6E (pseudogene) [Source:HGNC Symbol;Acc:HGNC:13934]
USP29	70	ENSG00000131864	USP29	0,814843761403509	0,087346813784216	0,957146233333333	0,383892966666667	100	0,521323703885854	6,9921597646983	6,22655260684724e-11	30 x 1	19 q13	ubiquitin specific peptidase 29 [Source:HGNC Symbol;Acc:HGNC:18563]
FGF7	71	ENSG00000140285	FGF7	0,868520755639098	0,0859607174155038	0,95713515	0,3837721	100	0,521664031877078	6,998430186727	6,02711214270357e-11	30 x 1	15 q21	fibroblast growth factor 7 [Source:HGNC Symbol;Acc:HGNC:3685]
DDR2	72	ENSG00000162733	DDR2	0,739139884887218	0,209556186229112	0,9570048	0,06179143	100	0,712583821495249	11,6249229184314	0	30 x 1	1 q23	discoidin domain receptor tyrosine kinase 2 [Source:HGNC Symbol;Acc:HGNC:2731]
HOXB2	73	ENSG00000173917	HOXB2	0,791270419172932	0,100286499161707	0,95676035	0,49216705	100	0,123157391773709	1,42041417677412	0,0789314198802652	30 x 1	17 q21	homeobox B2 [Source:HGNC Symbol;Acc:HGNC:5113]
SFTPD	74	ENSG00000133661	SFTPD	0,743867093233083	0,206733550979491	0,9565026	0,1039161	100	0,68917714500868	10,886103109626	0	30 x 1	10 q22	surfactant protein D [Source:HGNC Symbol;Acc:HGNC:10803]
CDH17	75	ENSG00000079112	CDH17	0,784818742230576	0,144874249730595	0,9556074	0,206769476666667	100	0,846647130200021	18,2095903943642	0	30 x 1	8 q22	cadherin 17, LI cadherin (liver-intestine) [Source:HGNC Symbol;Acc:HGNC:1756]
HOXA5	76	ENSG00000106004	HOXA5	0,798287099874687	0,133422676686079	0,955001833333333	0,14272545	100	-0,140885744720499	-1,62875649405969	0,947116447214471	30 x 1	7 p15	homeobox A5 [Source:HGNC Symbol;Acc:HGNC:5106]
DIRAS3	77	ENSG00000162595	DIRAS3	0,81116870443609	0,12076195400227	0,95489015	0,3339361	100	0,0708550293727704	0,8130162941733	0,20884192929563	30 x 1	1 p31	DIRAS family, GTP-binding RAS-like 3 [Source:HGNC Symbol;Acc:HGNC:687]
SRC	78	ENSG00000197122	SRC	0,895101878195489	0,0610847825220833	0,954815933333333	0,6657496	100	0,558907949139265	7,71438097824717	1,36024524977074e-12	30 x 1	NA	SRC proto-oncogene, non-receptor tyrosine kinase [Source:HGNC Symbol;Acc:HGNC:11283]
SLC5A5	79	ENSG00000105641	SLC5A5	0,616206722330827	0,227977158022439	0,9546247	0,07659557	100	0,191467282733444	2,23275135673159	0,0136314609563962	30 x 4	19 p13	solute carrier family 5 (sodium/iodide cotransporter), member 5 [Source:HGNC Symbol;Acc:HGNC:11040]
IAPP	80	ENSG00000121351	IAPP	0,618831618646617	0,22404246974826	0,9541462	0,03984553	100	0,512929888525156	6,83893557494028	1,37418965096003e-10	28 x 1	12 p12	islet amyloid polypeptide [Source:HGNC Symbol;Acc:HGNC:5329]
SLC22A2	81	ENSG00000112499	SLC22A2	0,83215282518797	0,106731056402391	0,9539157	0,33627935	100	0,564803072466762	7,83357386742837	7,14317494043826e-13	30 x 1	6 q25	solute carrier family 22 (organic cation transporter), member 2 [Source:HGNC Symbol;Acc:HGNC:10966]
SFTPC	82	ENSG00000168484	SFTPC	0,71914202481203	0,18069979167764	0,9530451	0,1905508	100	0,645339456310931	9,6691806149064	0	30 x 1	8 p21	surfactant protein C [Source:HGNC Symbol;Acc:HGNC:10802]
WNT8B	83	ENSG00000075290	WNT8B	0,719080389473684	0,140621554023355	0,95245645	0,28373145	100	0,669137000487785	10,3057736470741	0	30 x 1	10 q24	wingless-type MMTV integration site family, member 8B [Source:HGNC Symbol;Acc:HGNC:12789]
APOC2	84	ENSG00000234906	APOC2	0,606359933834586	0,198762969958215	0,9521648	0,1880432	100	0,640453096503829	9,54472219103824	0	28 x 1	19 q13	apolipoprotein C-II [Source:HGNC Symbol;Acc:HGNC:609]
SOD3	85	ENSG00000109610	SOD3	0,68436535	0,182887726472558	0,9517825	0,2050033	100	0,659605537363521	10,0444522795319	0	30 x 1	4 p15	superoxide dismutase 3, extracellular [Source:HGNC Symbol;Acc:HGNC:11181]
AXIN1	86	ENSG00000103126	AXIN1	0,581742420451128	0,271256700142841	0,9515827	0,06759456	100	0,400863760807601	5,00808509549743	8,70261495533597e-07	27 x 1	16 p13	axin 1 [Source:HGNC Symbol;Acc:HGNC:903]
KRT5	87	ENSG00000186081	KRT5	0,748628487218045	0,16327209793572	0,949756	0,1531467	100	0,764915161350984	13,5917284611605	0	30 x 1	12 q13	keratin 5 [Source:HGNC Symbol;Acc:HGNC:6442]
BRCA1	88	ENSG00000012048	BRCA1	0,790236802255639	0,139369777334764	0,9487078	0,2192897	100	0,0651092758970128	0,746794317081223	0,228262973512224	30 x 1	17 q21	breast cancer 1, early onset [Source:HGNC Symbol;Acc:HGNC:1100]
CXCL9	89	ENSG00000138755	CXCL9	0,582345710150376	0,292702623220372	0,9485149	0,05687265	100	0,262081629852904	3,10831013862347	0,0011541746150554	27 x 1	4 q21	chemokine (C-X-C motif) ligand 9 [Source:HGNC Symbol;Acc:HGNC:7098]
AATK	90	ENSG00000181409	AATK	0,738605846817043	0,122640472917885	0,9482076	0,380457283333333	100	0,715775511702296	11,731444888978	0	30 x 1	17 q25	apoptosis-associated tyrosine kinase [Source:HGNC Symbol;Acc:HGNC:21]
GFAP	91	ENSG00000131095	GFAP	0,679179834323308	0,176523911061857	0,94759355	0,231211	100	0,735346619577199	12,4192654050681	0	30 x 1	17 q21	glial fibrillary acidic protein [Source:HGNC Symbol;Acc:HGNC:4235]
UGT1A1	92	ENSG00000242366	UGT1A1	0,807116916466165	0,0826572461931762	0,947119133333333	0,5882154	100	0,711135600185932	11,5770749216557	0	30 x 1	2 q37	UDP glucuronosyltransferase 1 family, polypeptide A1 [Source:HGNC Symbol;Acc:HGNC:12530]
APBA2	93	ENSG00000276495	APBA2	0,620412981766917	0,206678240132511	0,9443008	0,093416175	100	0,813711732116711	16,0224653879263	0	28 x 1	NA	amyloid beta (A4) precursor protein-binding, family A, member 2 [Source:HGNC Symbol;Acc:HGNC:579]
TFF1	94	ENSG00000160182	TFF1	0,591552065714286	0,228800499366677	0,9423535	0,07636974	100	0,706451530027433	11,4243402396672	0	27 x 1	NA	trefoil factor 1 [Source:HGNC Symbol;Acc:HGNC:11755]
CHI3L2	95	ENSG00000064886	CHI3L2	0,574424648345865	0,232655136054996	0,94209825	0,051582155	100	0,600008313750627	8,58432820891677	1,15463194561016e-14	27 x 1	1 p13	chitinase 3-like 2 [Source:HGNC Symbol;Acc:HGNC:1933]
INS	96	ENSG00000254647	INS	0,663264695789474	0,198293368484421	0,94145605	0,1388584	100	0,734782693470422	12,3985556594912	0	29 x 1	11 p15	insulin [Source:HGNC Symbol;Acc:HGNC:6081]
MMP3	97	ENSG00000149968	MMP3	0,68639814075188	0,215352980977474	0,94130055	0,16496805	100	0,687730029345214	10,8426898636826	0	30 x 1	11 q22	matrix metallopeptidase 3 (stromelysin 1, progelatinase) [Source:HGNC Symbol;Acc:HGNC:7173]
FGFR4	98	ENSG00000160867	FGFR4	0,680274852631579	0,201577413949581	0,9412779	0,1633903	100	0,723548324663936	11,9972537538305	0	29 x 1	5 q35	fibroblast growth factor receptor 4 [Source:HGNC Symbol;Acc:HGNC:3691]
NBL1	99	ENSG00000158747	NBL1	0,641266995639098	0,206926037280515	0,94058785	0,07412422	100	0,599000497762155	8,56183028498822	1,31006316905768e-14	29 x 1	1 p36	neuroblastoma 1, DAN family BMP antagonist [Source:HGNC Symbol;Acc:HGNC:7650]
FRK	100	ENSG00000111816	FRK	0,588057121052632	0,275062097985046	0,93941315	0,06308609	100	0,683631160600061	10,7210462546888	0	27 x 1	6 q22	fyn-related Src family tyrosine kinase [Source:HGNC Symbol;Acc:HGNC:3955]
EGF	101	ENSG00000138798	EGF	0,711434489849624	0,12046558814859	0,9392508	0,376280593333333	100	0,704393932014977	11,3582020985077	0	30 x 1	4 q25	epidermal growth factor [Source:HGNC Symbol;Acc:HGNC:3229]
ACTG2	102	ENSG00000163017	ACTG2	0,698110690726817	0,199989761401584	0,938571433333333	0,10523791	100	0,769910452445718	13,8086674730737	0	30 x 1	2 p13	actin, gamma 2, smooth muscle, enteric [Source:HGNC Symbol;Acc:HGNC:145]
PLG	103	ENSG00000122194	PLG	0,740651462406015	0,127498719337663	0,9381948	0,34281685	100	0,766202038567503	13,6470379761787	0	30 x 1	6 q26	plasminogen [Source:HGNC Symbol;Acc:HGNC:9071]
NDN	104	ENSG00000182636	NDN	0,695139263533835	0,150281998997519	0,9365245	0,23350055	100	0,659893798879603	10,0522265676387	0	30 x 1	15 q11	necdin, melanoma antigen (MAGE) family member [Source:HGNC Symbol;Acc:HGNC:7675]
ZIM2	105	ENSG00000269699	ZIM2	0,802940166541353	0,101873215858989	0,9365151	0,4134791	100	-0,332206297088109	-4,03122099695126	0,999953192306332	30 x 1	19 q13	zinc finger, imprinted 2 [Source:HGNC Symbol;Acc:HGNC:12875]
PMP22	106	ENSG00000109099	PMP22	0,62907476018797	0,111464406638121	0,9362332	0,44497079	100	0,608251509323643	8,77077950942911	3,99680288865056e-15	28 x 1	17 p12	peripheral myelin protein 22 [Source:HGNC Symbol;Acc:HGNC:9118]
IL1RN	107	ENSG00000136689	IL1RN	0,716407708909774	0,176183422566179	0,93528545	0,21893843	100	0,62706859839278	9,2136835619228	3,33066907387547e-16	30 x 1	2 q14	interleukin 1 receptor antagonist [Source:HGNC Symbol;Acc:HGNC:6000]
MMP19	108	ENSG00000123342	MMP19	0,634060099398496	0,17008808188578	0,9344947	0,221708745	100	0,760873806093699	13,4205584807082	0	28 x 1	12 q13	matrix metallopeptidase 19 [Source:HGNC Symbol;Acc:HGNC:7165]
TRIM29	109	ENSG00000137699	TRIM29	0,627988442932331	0,196397815836358	0,933943633333333	0,0803017133333333	100	0,813630816635878	16,0177511695535	0	28 x 1	11 q23	tripartite motif containing 29 [Source:HGNC Symbol;Acc:HGNC:17274]
LRRK1	110	ENSG00000154237	LRRK1	0,728527976992481	0,113746292304705	0,93260245	0,48450302	100	0,612208427251818	8,86186590947426	2,44249065417534e-15	30 x 1	15 q26	leucine-rich repeat kinase 1 [Source:HGNC Symbol;Acc:HGNC:18608]
MSH3	111	ENSG00000113318	MSH3	0,731094242368421	0,111351395195845	0,93234825	0,035379485	100	0,0516853259135763	0,592357326625144	0,277316199954195	30 x 1	5 q14	mutS homolog 3 [Source:HGNC Symbol;Acc:HGNC:7326]
SNRPN	112	ENSG00000128739	SNRPN	0,765217957518797	0,080136890360271	0,93215975	0,4308022	100	0,400079009506672	4,99641050822413	9,15646965693462e-07	30 x 1	15 q11	small nuclear ribonucleoprotein polypeptide N [Source:HGNC Symbol;Acc:HGNC:11164]
CCKAR	113	ENSG00000163394	CCKAR	0,756422317142857	0,145204184373863	0,9316504	0,21282675	100	0,664291171507417	10,1718065612396	0	30 x 1	4 p15	cholecystokinin A receptor [Source:HGNC Symbol;Acc:HGNC:1570]
CSF2	114	ENSG00000164400	CSF2	0,662267703609023	0,219316621806549	0,93084265	0,07163002	100	0,619894032309967	9,04185329899243	8,88178419700125e-16	29 x 1	5 q31	colony stimulating factor 2 (granulocyte-macrophage) [Source:HGNC Symbol;Acc:HGNC:2434]
HGF	115	ENSG00000019991	HGF	0,570321039323308	0,213483872324204	0,9298159	0,10203321	100	0,489344563411331	6,42227419200723	1,13651177358065e-09	27 x 2	7 q21	hepatocyte growth factor (hepapoietin A; scatter factor) [Source:HGNC Symbol;Acc:HGNC:4893]
FGF1	116	ENSG00000113578	FGF1	0,675171148120301	0,180030593352095	0,92923075	0,1318332	100	0,817230319094484	16,2301694656267	0	30 x 1	5 q31	fibroblast growth factor 1 (acidic) [Source:HGNC Symbol;Acc:HGNC:3665]
MSH2	117	ENSG00000095002	MSH2	0,779625878947368	0,123823134003071	0,9289384	0,157117	100	0,364588668541305	4,48136642875985	8,00138516232618e-06	30 x 1	2 p21	mutS homolog 2 [Source:HGNC Symbol;Acc:HGNC:7325]
SFTPA1	118	ENSG00000122852	SFTPA1	0,642131098834586	0,187942741138913	0,9286817	0,09630652	100	0,749083623840549	12,9418439979261	0	28 x 1	10 q22	surfactant protein A1 [Source:HGNC Symbol;Acc:HGNC:10798]
FANCA	119	ENSG00000187741	FANCA	0,81276287112782	0,100256592759209	0,9285739	0,05376516	100	0,404451131960296	5,06162172009976	6,88655387159898e-07	30 x 1	16 q24	Fanconi anemia, complementation group A [Source:HGNC Symbol;Acc:HGNC:3582]
PGR	120	ENSG00000082175	PGR	0,595062971253133	0,174505306572792	0,9253065	0,138334416666667	100	0,699254014532117	11,1954497374086	0	27 x 1	11 q22	progesterone receptor [Source:HGNC Symbol;Acc:HGNC:8910]
DMP1	121	ENSG00000152592	DMP1	0,630327831954887	0,198486031904011	0,9248597	0,12713204	100	0,744760416539189	12,7735120043154	0	28 x 1	4 q22	dentin matrix acidic phosphoprotein 1 [Source:HGNC Symbol;Acc:HGNC:2932]
CTLA4	122	ENSG00000163599	CTLA4	0,766475789473684	0,0983404353082463	0,9239995	0,4300426	100	0,586192546128639	8,28130600320339	6,17284001691587e-14	30 x 1	2 q33	cytotoxic T-lymphocyte-associated protein 4 [Source:HGNC Symbol;Acc:HGNC:2505]
PLAGL1	123	ENSG00000118495	PLAGL1	0,658015911253133	0,175019721635435	0,923854533333333	0,08081925	100	0,315285598000701	3,80255073309648	0,000109310873392054	30 x 2	6 q24	pleiomorphic adenoma gene-like 1 [Source:HGNC Symbol;Acc:HGNC:9046]
TMPRSS4	124	ENSG00000137648	TMPRSS4	0,589905495263158	0,162670048852278	0,9234211	0,138641265	100	0,648342738850708	9,74668083343293	0	27 x 1	11 q23	transmembrane protease, serine 4 [Source:HGNC Symbol;Acc:HGNC:11878]
MUSK	125	ENSG00000030304	MUSK	0,704099731578947	0,145420299201387	0,9221935	0,2746148	100	0,524623399286941	7,05314990242471	4,5342618548716e-11	30 x 1	9 q31	muscle, skeletal, receptor tyrosine kinase [Source:HGNC Symbol;Acc:HGNC:7525]
GNAS	126	ENSG00000087460	GNAS	0,799163534511278	0,0814070081618781	0,92127805	0,43494274	100	0,145650987287154	1,68502074818151	0,0471827020683766	30 x 1	NA	GNAS complex locus [Source:HGNC Symbol;Acc:HGNC:4392]
CPA4	127	ENSG00000128510	CPA4	0,667943802080201	0,0836459329517293	0,920861433333333	0,438101766666667	100	0,634939604413549	9,40664702274651	1,11022302462516e-16	30 x 2	7 q32	carboxypeptidase A4 [Source:HGNC Symbol;Acc:HGNC:15740]
C4B	128	ENSG00000224389	C4B	0,656193654135338	0,148969059526828	0,9199558	0,1974598	100	0,799296684999149	15,2235170100256	0	29 x 1	6 p21	complement component 4B (Chido blood group) [Source:HGNC Symbol;Acc:HGNC:1324]
SLC22A18	129	ENSG00000110628	SLC22A18	0,584268220639098	0,200432217032627	0,91974845	0,081834045	100	0,578098763615776	8,1089607732602	1,5931700403371e-13	27 x 1	11 p15	solute carrier family 22, member 18 [Source:HGNC Symbol;Acc:HGNC:10964]
PECAM1	130	ENSG00000261371	PECAM1	0,56494243387218	0,205100089058605	0,91591355	0,03866962	100	0,235956577403128	2,77911877769823	0,00312644548282925	30 x 5	17 q23	platelet/endothelial cell adhesion molecule 1 [Source:HGNC Symbol;Acc:HGNC:8823]
XPC	131	ENSG00000154767	XPC	0,727295590977444	0,102979957618327	0,9124008	0,3375741	100	0,155093974665294	1,79687435705887	0,0373298100188655	30 x 1	3 p25	xeroderma pigmentosum, complementation group C [Source:HGNC Symbol;Acc:HGNC:12816]
TEK	132	ENSG00000120156	TEK	0,659349833759398	0,1446675764125	0,90992955	0,31426648	100	0,131711124849915	1,52075129759498	0,0653661586851236	30 x 3	9 p21	TEK tyrosine kinase, endothelial [Source:HGNC Symbol;Acc:HGNC:11724]
MC2R	133	ENSG00000185231	MC2R	0,744135914285714	0,143480695151348	0,9091913	0,3557191	100	0,368544843141331	4,53758959318509	6,36201610881848e-06	30 x 1	NA	melanocortin 2 receptor (adrenocorticotropic hormone) [Source:HGNC Symbol;Acc:HGNC:6930]
TRPM5	134	ENSG00000070985	TRPM5	0,62478576716792	0,202186483851656	0,908969966666667	0,08957504	100	0,842807834420976	17,9229188448167	0	28 x 1	11 p15	transient receptor potential cation channel, subfamily M, member 5 [Source:HGNC Symbol;Acc:HGNC:14323]
SNURF	135	ENSG00000273173	SNURF	0,61292649122807	0,110448697305383	0,9027828	0,150703016666667	100	0,374045736260797	4,61624086250815	4,60209995956085e-06	30 x 4	15 q11	SNRPN upstream reading frame [Source:HGNC Symbol;Acc:HGNC:11171]
SNCG	136	ENSG00000173267	SNCG	0,667901884260652	0,163784072720328	0,902053633333333	0,0759111833333333	100	0,546468994302378	7,46839145967973	5,08304509594382e-12	30 x 2	10 q23	synuclein, gamma (breast cancer-specific protein 1) [Source:HGNC Symbol;Acc:HGNC:11141]
B3GALT5	137	ENSG00000183778	B3GALT5	0,619228573609023	0,179912099191965	0,9007119	0,11042088	100	0,558673138616512	7,70966898829229	1,39510625274397e-12	28 x 1	NA	UDP-Gal:betaGlcNAc beta 1,3-galactosyltransferase, polypeptide 5 [Source:HGNC Symbol;Acc:HGNC:920]
APOC1	138	ENSG00000130208	APOC1	0,621782188721804	0,151807649862542	0,8987827	0,2730368	100	0,849797692449846	18,4523114474861	0	28 x 1	19 q13	apolipoprotein C-I [Source:HGNC Symbol;Acc:HGNC:607]
PI3	139	ENSG00000124102	PI3	0,60566245047619	0,153294663042883	0,897291566666667	0,237371146666667	100	0,756628732319605	13,2447520945127	0	28 x 1	NA	peptidase inhibitor 3, skin-derived [Source:HGNC Symbol;Acc:HGNC:8947]
HLA-DQA2	140	ENSG00000231526	HLA-DQA2	0,732138643909774	0,114367249839905	0,8969958	0,35249125	100	0,545296635066991	7,44557858951508	5,73963099270713e-12	30 x 1	NA	major histocompatibility complex, class II, DQ alpha 2 [Source:HGNC Symbol;Acc:HGNC:4943]
TFDP1	141	ENSG00000198176	TFDP1	0,69465022481203	0,124756198939366	0,8924521	0,193149	100	0,641617924548608	9,57421008979074	0	30 x 1	NA	transcription factor Dp-1 [Source:HGNC Symbol;Acc:HGNC:11749]
SLC14A1	142	ENSG00000141469	SLC14A1	0,602836505451128	0,136345692996062	0,89177315	0,084380675	100	0,712472149299592	11,6212226703957	0	28 x 2	NA	solute carrier family 14 (urea transporter), member 1 (Kidd blood group) [Source:HGNC Symbol;Acc:HGNC:10918]
HLA-DOB	143	ENSG00000243612	HLA-DOB	0,61811756802005	0,127934455755364	0,890112633333333	0,380459913333333	100	0,455635229329518	5,85843558569611	1,78599433020565e-08	28 x 2	NA	major histocompatibility complex, class II, DO beta [Source:HGNC Symbol;Acc:HGNC:4937]
GABRA5	144	ENSG00000186297	GABRA5	0,701339971528822	0,138106059179922	0,888286066666667	0,318011133333333	100	0,581032485723235	8,1710052701684	1,13353770814228e-13	30 x 1	15 q12	gamma-aminobutyric acid (GABA) A receptor, alpha 5 [Source:HGNC Symbol;Acc:HGNC:4079]
TDG	145	ENSG00000139372	TDG	0,72541729924812	0,105303942201759	0,8864908	0,2842477	100	0,442481737077374	5,64737058419197	4,83868292100453e-08	30 x 1	12 q23	thymine-DNA glycosylase [Source:HGNC Symbol;Acc:HGNC:11700]
MAD2L1	146	ENSG00000164109	MAD2L1	0,747760904511278	0,0602232031507248	0,8715473	0,5497953	100	0,214621904464601	2,51506808013601	0,0065552021416756	30 x 1	4 q27	MAD2 mitotic arrest deficient-like 1 (yeast) [Source:HGNC Symbol;Acc:HGNC:6763]
TRIP6	147	ENSG00000087077	TRIP6	0,573494924987469	0,133141997189511	0,8567018	0,09775019	100	0,0202492126822001	0,231810361911841	0,408523513149331	30 x 5	7 q22	thyroid hormone receptor interactor 6 [Source:HGNC Symbol;Acc:HGNC:12311]

## Sheet: Met Spot 6
	Rank	ID	Symbol	mean expression	SD	max delta e	min delta e	% high expressed	correlation	->t.score	->p.value	Metagene	Chromosome	Description
FHIT	1	ENSG00000189283	FHIT	0,0861513759022556	0,190965068236416	0,93965795	0,0102315875	10	0,00202548740601198	0,0231828105348046	0,490769862799546	1 x 2	3 p14	fragile histidine triad [Source:HGNC Symbol;Acc:HGNC:3701]
ABCC5	2	ENSG00000114770	ABCC5	0,136205876766917	0,196256285193335	0,9378023	0,01069397	17	0,345741226374942	4,21726857539892	2,29008687656629e-05	1 x 5	3 q27	ATP-binding cassette, sub-family C (CFTR/MRP), member 5 [Source:HGNC Symbol;Acc:HGNC:56]
CCND2	3	ENSG00000118971	CCND2	0,100992856992481	0,192078369506675	0,93644515	0,012069595	11	0,494301373182086	6,50822381659065	7,38735517202826e-10	1 x 3	12 p13	cyclin D2 [Source:HGNC Symbol;Acc:HGNC:1583]
CDKN2B	4	ENSG00000147883	CDKN2B	0,125343749868421	0,185617838243698	0,93190855	0,014960367	15	0,125528721783335	1,44819715015109	0,0749755662290732	2 x 4	9 p21	cyclin-dependent kinase inhibitor 2B (p15, inhibits CDK4) [Source:HGNC Symbol;Acc:HGNC:1788]
JAG1	5	ENSG00000101384	JAG1	0,105315218496241	0,177246249628701	0,9286769	0,0154042	8	0,492744226651042	6,48113388241214	8,46412495647542e-10	1 x 4	NA	jagged 1 [Source:HGNC Symbol;Acc:HGNC:6188]
IL17RB	6	ENSG00000056736	IL17RB	0,161485861823308	0,192329221423578	0,92454985	0,01597803	25	0,613261832055051	8,88629316102795	2,1094237467878e-15	1 x 6	3 p21	interleukin 17 receptor B [Source:HGNC Symbol;Acc:HGNC:18015]
TGFA	7	ENSG00000163235	TGFA	0,078483482481203	0,126817925064644	0,922163	0,013346472	6	0,470131004062289	6,09666410249853	5,66557600834017e-09	1 x 2	2 p13	transforming growth factor, alpha [Source:HGNC Symbol;Acc:HGNC:11765]
TIAM1	8	ENSG00000156299	TIAM1	0,130927064526316	0,233205125678764	0,9191939	0,0092145735	15	0,305743972385923	3,67540081513697	0,000172573778933316	1 x 5	NA	T-cell lymphoma invasion and metastasis 1 [Source:HGNC Symbol;Acc:HGNC:11805]
TGFB2	9	ENSG00000092969	TGFB2	0,114821374473684	0,159869285612898	0,91136715	0,022616005	12	0,610270674261744	8,81712837194842	3,10862446895044e-15	1 x 4	1 q41	transforming growth factor, beta 2 [Source:HGNC Symbol;Acc:HGNC:11768]
TES	10	ENSG00000135269	TES	0,157169901616541	0,171740745204742	0,9030403	0,034840895	14	0,153178888553947	1,77415018977495	0,0391806991141472	1 x 6	7 q31	testis derived transcript (3 LIM domains) [Source:HGNC Symbol;Acc:HGNC:14620]
ZMYND10	11	ENSG00000004838	ZMYND10	0,145535720488722	0,203096506209154	0,89919125	0,01288755	18	0,396963402600286	4,95018885668561	1,11899645349745e-06	1 x 6	3 p21	zinc finger, MYND-type containing 10 [Source:HGNC Symbol;Acc:HGNC:19412]
NEO1	12	ENSG00000067141	NEO1	0,158949845864662	0,219989521372414	0,898989	0,00983835	19	0,302281412272853	3,62956453715065	0,00020290881648477	1 x 6	15 q24	neogenin 1 [Source:HGNC Symbol;Acc:HGNC:7754]
TCF4	13	ENSG00000196628	TCF4	0,0985039046240602	0,14199593719428	0,89426105	0,024355325	8	0,275807117012827	3,2841386203945	0,000656094454953404	1 x 3	NA	transcription factor 4 [Source:HGNC Symbol;Acc:HGNC:11634]
HPSE	14	ENSG00000173083	HPSE	0,11010354974812	0,178441911546508	0,89052865	0,0117555945	14	0,466943881501152	6,04375875549235	7,32608551601288e-09	1 x 4	4 q21	heparanase [Source:HGNC Symbol;Acc:HGNC:5164]
BMP3	15	ENSG00000152785	BMP3	0,132718899112782	0,211713374707015	0,8859059	0,014470155	14	0,397995039519188	4,96547108115803	1,04733548478286e-06	1 x 5	4 q21	bone morphogenetic protein 3 [Source:HGNC Symbol;Acc:HGNC:1070]
KLF5	16	ENSG00000102554	KLF5	0,0906618721315789	0,130695682685379	0,8855515	0,012960949	6	0,506662569695241	6,72627216278998	2,44746112265659e-10	1 x 3	NA	Kruppel-like factor 5 (intestinal) [Source:HGNC Symbol;Acc:HGNC:6349]
FES	17	ENSG00000182511	FES	0,126337131665414	0,156463991918424	0,8849974	0,0141551865	10	0,475889717877318	6,19303701590572	3,53697626742644e-09	1 x 5	15 q26	FES proto-oncogene, tyrosine kinase [Source:HGNC Symbol;Acc:HGNC:3657]
E2F3	18	ENSG00000112242	E2F3	0,0623446445112782	0,115578812840408	0,883289	0,01353331	3	0,180425110434353	2,0995155036694	0,0188450078569895	1 x 1	6 p22	E2F transcription factor 3 [Source:HGNC Symbol;Acc:HGNC:3115]
SKI	19	ENSG00000157933	SKI	0,0602261017293233	0,135746852299452	0,8771921	0,01084487	5	0,441363373818403	5,62963832310846	5,25647112503691e-08	1 x 1	1 p36	SKI proto-oncogene [Source:HGNC Symbol;Acc:HGNC:10896]
EPHB2	20	ENSG00000133216	EPHB2	0,0940560550639098	0,166436194573048	0,8723103	0,0153623	8	0,45273754127721	5,81153352326428	2,2325903792364e-08	1 x 3	1 p36	EPH receptor B2 [Source:HGNC Symbol;Acc:HGNC:3393]
GAS1	21	ENSG00000180447	GAS1	0,0857788938007519	0,162424038079963	0,87107845	0,0094766355	11	0,226666528758785	2,66364522627512	0,00435015791325677	1 x 3	9 q21	growth arrest-specific 1 [Source:HGNC Symbol;Acc:HGNC:4165]
APC	22	ENSG00000134982	APC	0,108046636441103	0,0876089129716785	0,8694796	0,05320505	2	0,322736308194142	3,9027249097873	7,57058956268875e-05	3 x 1	5 q22	adenomatous polyposis coli [Source:HGNC Symbol;Acc:HGNC:583]
LAMC1	23	ENSG00000135862	LAMC1	0,0661199958270677	0,112375850897289	0,8691552	0,0179266445	4	0,44576845752905	5,69967365887645	3,78681943580261e-08	1 x 2	1 q25	laminin, gamma 1 (formerly LAMB2) [Source:HGNC Symbol;Acc:HGNC:6492]
ENC1	24	ENSG00000171617	ENC1	0,0845733804511278	0,138920651818668	0,8677181	0,01958703	8	0,350423581639159	4,28231726954077	1,77452381475707e-05	1 x 3	5 q13	ectodermal-neural cortex 1 (with BTB domain) [Source:HGNC Symbol;Acc:HGNC:3345]
ABL1	25	ENSG00000097007	ABL1	0,163521551954887	0,227584908382773	0,8666095	0,01430083	20	0,435138214804569	5,53152541200296	8,29002446689486e-08	1 x 6	9 q34	ABL proto-oncogene 1, non-receptor tyrosine kinase [Source:HGNC Symbol;Acc:HGNC:76]
PXN	26	ENSG00000089159	PXN	0,163249114887218	0,148444147688457	0,859585	0,01285544	26	0,381092974396119	4,71783150192252	3,01305139893682e-06	5 x 1	12 q24	paxillin [Source:HGNC Symbol;Acc:HGNC:9718]
MYH11	27	ENSG00000133392	MYH11	0,11885167943609	0,172589312614167	0,85306385	0,01383216	18	0,420769474140109	5,30875085049473	2,29305784360534e-07	1 x 4	16 p13	myosin, heavy chain 11, smooth muscle [Source:HGNC Symbol;Acc:HGNC:7569]
EDN1	28	ENSG00000078401	EDN1	0,0933732551879699	0,11705331501634	0,84994745	0,024911555	7	0,516985353424432	6,91262572619375	9,39961442014692e-11	1 x 3	6 p24	endothelin 1 [Source:HGNC Symbol;Acc:HGNC:3176]
AHR	29	ENSG00000106546	AHR	0,111717941503759	0,169191794807738	0,84548195	0,01933513	12	0,140055504144419	1,61896559882444	0,0539298734138501	3 x 1	7 p21	aryl hydrocarbon receptor [Source:HGNC Symbol;Acc:HGNC:348]
TJP2	30	ENSG00000119139	TJP2	0,0550984641052632	0,0824596927987104	0,83851225	0,011364136	2	0,232894821245353	2,74097457940707	0,00349078708101147	1 x 1	9 q21	tight junction protein 2 [Source:HGNC Symbol;Acc:HGNC:11828]
PDGFA	31	ENSG00000197461	PDGFA	0,139031527221805	0,10858530816354	0,83579495	0,0100320055	6	0,232787543176574	2,73963965100365	0,00350420974673749	1 x 5	7 p22	platelet-derived growth factor alpha polypeptide [Source:HGNC Symbol;Acc:HGNC:8799]
CRIP1	32	ENSG00000257341	CRIP1	0,129477391503759	0,128110187214821	0,8308679	0,01299243	16	0,50643080610693	6,72213371129135	2,49970266708033e-10	4 x 1	14 q32	cysteine-rich protein 1 (intestinal) [Source:HGNC Symbol;Acc:HGNC:2360]
MCC	33	ENSG00000171444	MCC	0,101882362293233	0,123337025134324	0,82605005	0,01989628	11	0,173110875109936	2,01171673685701	0,0231505651324104	1 x 3	5 q22	mutated in colorectal cancers [Source:HGNC Symbol;Acc:HGNC:6935]
ACVR1B	34	ENSG00000135503	ACVR1B	0,0864966295864662	0,119386664093218	0,8248741	0,01392889	6	0,497472811041656	6,56365495655497	5,58745494316781e-10	1 x 3	12 q13	activin A receptor, type IB [Source:HGNC Symbol;Acc:HGNC:172]
TGFBR3	35	ENSG00000069702	TGFBR3	0,09582896	0,166426308460553	0,8228475	0,016508795	12	0,588471732856217	8,33051159223161	4,70734562441066e-14	1 x 4	1 p22	transforming growth factor, beta receptor III [Source:HGNC Symbol;Acc:HGNC:11774]
FGF8	36	ENSG00000107831	FGF8	0,109792147349624	0,165922107852358	0,82035145	0,01117845	14	0,686029860991913	10,7919981923197	0	1 x 4	10 q24	fibroblast growth factor 8 (androgen-induced) [Source:HGNC Symbol;Acc:HGNC:3686]
PLAUR	37	ENSG00000011422	PLAUR	0,119560846278195	0,159351949922094	0,81388545	0,01663008	17	0,373805993681707	4,61280134729254	4,66808714860711e-06	1 x 4	19 q13	plasminogen activator, urokinase receptor [Source:HGNC Symbol;Acc:HGNC:9053]
SMO	38	ENSG00000128602	SMO	0,0737398256015038	0,126947386593643	0,81123325	0,01220736	6	0,542528884067243	7,39196702552452	7,63167307127333e-12	1 x 2	7 q32	smoothened, frizzled class receptor [Source:HGNC Symbol;Acc:HGNC:11119]
OAT	39	ENSG00000065154	OAT	0,125736961052632	0,136561941338406	0,8072665	0,02083148	13	0,411895456342717	5,1736150510441	4,20005367374188e-07	2 x 4	10 q26	ornithine aminotransferase [Source:HGNC Symbol;Acc:HGNC:8091]
MGMT	40	ENSG00000170430	MGMT	0,118832145977444	0,175690472473829	0,80614655	0,015117635	15	0,130528047299992	1,50685349463732	0,0671279496682713	1 x 4	10 q26	O-6-methylguanine-DNA methyltransferase [Source:HGNC Symbol;Acc:HGNC:7059]
RBL2	41	ENSG00000103479	RBL2	0,0861305069172932	0,103261079360311	0,7990041	0,01277261	4	0,158636478143098	1,83896417692054	0,0340924690375543	1 x 1	16 q12	retinoblastoma-like 2 [Source:HGNC Symbol;Acc:HGNC:9894]
DUSP4	42	ENSG00000120875	DUSP4	0,146867081631579	0,147625898662326	0,79588285	0,013877231	20	0,416712834357576	5,24675034713792	3,03042813287746e-07	1 x 5	8 p12	dual specificity phosphatase 4 [Source:HGNC Symbol;Acc:HGNC:3070]
PTPRF	43	ENSG00000142949	PTPRF	0,145996106240601	0,165046562495787	0,7954448	0,01494323	17	0,586702753070892	8,29229473897872	5,81756864903582e-14	1 x 5	1 p34	protein tyrosine phosphatase, receptor type, F [Source:HGNC Symbol;Acc:HGNC:9670]
RAF1	44	ENSG00000132155	RAF1	0,0764248653834586	0,13435088741466	0,792099	0,009289456	8	0,403819160860694	5,05217028193635	7,17785790693704e-07	1 x 1	3 p25	Raf-1 proto-oncogene, serine/threonine kinase [Source:HGNC Symbol;Acc:HGNC:9829]
TMEFF1	45	ENSG00000241697	TMEFF1	0,13478691954386	0,154947262444339	0,788694366666667	0,010638506	13	0,648911947507627	9,7614573339551	0	1 x 5	9 q31	transmembrane protein with EGF-like and two follistatin-like domains 1 [Source:HGNC Symbol;Acc:HGNC:11866]
CD40	46	ENSG00000101017	CD40	0,0620152515037594	0,0811669466355843	0,78291455	0,01430567	3	0,437492167307603	5,56850865786829	6,98557263145716e-08	1 x 1	NA	CD40 molecule, TNF receptor superfamily member 5 [Source:HGNC Symbol;Acc:HGNC:11919]
TNFRSF10D	47	ENSG00000173530	TNFRSF10D	0,0697772203759398	0,131864005830514	0,78082035	0,01336772	4	0,601050540965753	8,60766148534815	1,01030295240889e-14	1 x 2	8 p21	tumor necrosis factor receptor superfamily, member 10d, decoy with truncated death domain [Source:HGNC Symbol;Acc:HGNC:11907]
UBA52	48	ENSG00000221983	UBA52	0,0938798873684211	0,0718407649567271	0,7788794	0,02413414	1	0,405838703666736	5,08240398572425	6,28588657791695e-07	2 x 1	19 p13	ubiquitin A-52 residue ribosomal protein fusion product 1 [Source:HGNC Symbol;Acc:HGNC:12458]
LAT	49	ENSG00000213658	LAT	0,152572317518797	0,128807481659027	0,7776655	0,02432684	14	0,416582668708201	5,24476725492011	3,05747687612268e-07	2 x 5	16 p11	linker for activation of T cells [Source:HGNC Symbol;Acc:HGNC:18874]
CAV1	50	ENSG00000105974	CAV1	0,157549588082707	0,173419151707575	0,77385065	0,016376635	23	0,350530980816678	4,28381355398628	1,76408903120873e-05	3 x 5	7 q31	caveolin 1, caveolae protein, 22kDa [Source:HGNC Symbol;Acc:HGNC:1527]
ACVR2B	51	ENSG00000114739	ACVR2B	0,0924250160676692	0,142974507661402	0,7712675	0,013754183	8	0,24456326319782	2,88681749974975	0,00227675578708642	1 x 3	3 p22	activin A receptor, type IIB [Source:HGNC Symbol;Acc:HGNC:174]
BCL6	52	ENSG00000113916	BCL6	0,0591328244135338	0,0822462676775833	0,7646654	0,007516767	2	0,479190248343132	6,24873414860599	2,6893465232547e-09	1 x 1	3 q27	B-cell CLL/lymphoma 6 [Source:HGNC Symbol;Acc:HGNC:1001]
COL4A3	53	ENSG00000169031	COL4A3	0,0688750838721805	0,110831826844149	0,75803485	0,01591103	5	0,0800922120535207	0,919651685712117	0,179722567762997	1 x 1	2 q36	collagen, type IV, alpha 3 (Goodpasture antigen) [Source:HGNC Symbol;Acc:HGNC:2204]
ESR2	54	ENSG00000140009	ESR2	0,0547105171691729	0,0827133458417997	0,75304245	0,01281061	2	0,349465863846504	4,26898285693325	1,87017050162774e-05	1 x 1	14 q23	estrogen receptor 2 (ER beta) [Source:HGNC Symbol;Acc:HGNC:3468]
ELK3	55	ENSG00000111145	ELK3	0,173970625714286	0,135795543608343	0,7519847	0,03617398	29	0,4173212631263	5,25602502947643	2,90699022409413e-07	5 x 3	12 q23	ELK3, ETS-domain protein (SRF accessory protein 2) [Source:HGNC Symbol;Acc:HGNC:3325]
ABCG2	56	ENSG00000118777	ABCG2	0,100433818834586	0,120597556735742	0,75138705	0,019713615	8	0,318311811743456	3,84314213028494	9,42683751572471e-05	1 x 3	4 q22	ATP-binding cassette, sub-family G (WHITE), member 2 (Junior blood group) [Source:HGNC Symbol;Acc:HGNC:74]
RAD54B	57	ENSG00000197275	RAD54B	0,0777452928045113	0,0976375931803603	0,7462152	0,009051443	5	0,0922813177255296	1,06073413622588	0,145381238769914	1 x 1	8 q22	RAD54 homolog B (S. cerevisiae) [Source:HGNC Symbol;Acc:HGNC:17228]
RYK	58	ENSG00000163785	RYK	0,0891208985714286	0,133946472334422	0,738835	0,01597882	6	0,578635285399172	8,12027198774057	1,49769086021934e-13	1 x 3	3 q22	receptor-like tyrosine kinase [Source:HGNC Symbol;Acc:HGNC:10481]
IL11	59	ENSG00000095752	IL11	0,16541575906015	0,123656670716824	0,7348477	0,04021439	26	0,483588741866484	6,32349550605423	1,85826620757723e-09	1 x 6	19 q13	interleukin 11 [Source:HGNC Symbol;Acc:HGNC:5966]
CCND1	60	ENSG00000110092	CCND1	0,0917836194736842	0,131909854902852	0,7266883	0,014633345	8	0,391410432748514	4,86830933588361	1,59181374503881e-06	1 x 3	11 q13	cyclin D1 [Source:HGNC Symbol;Acc:HGNC:1582]
CD2	61	ENSG00000116824	CD2	0,159706523082707	0,120106041597189	0,7221935	0,02567957	25	0,269282208647822	3,2002902723745	0,000861303490440113	5 x 1	1 p13	CD2 molecule [Source:HGNC Symbol;Acc:HGNC:1639]
ERN1	62	ENSG00000178607	ERN1	0,149123561654135	0,157929610743466	0,7202684	0,01411495	20	0,614674423744076	8,91916892234071	1,77635683940025e-15	5 x 1	17 q23	endoplasmic reticulum to nucleus signaling 1 [Source:HGNC Symbol;Acc:HGNC:3449]
HBEGF	63	ENSG00000113070	HBEGF	0,0366043539097744	0,0702392421944752	0,720064	0,01005792	2	0,560413017150419	7,74464772654925	1,15529807942494e-12	1 x 1	5 q31	heparin-binding EGF-like growth factor [Source:HGNC Symbol;Acc:HGNC:3059]
ITGB4	64	ENSG00000132470	ITGB4	0,0917952238759398	0,0959770606572793	0,71223265	0,01356143	4	0,543545871063463	7,41162621494503	6,87516710229374e-12	2 x 2	17 q25	integrin, beta 4 [Source:HGNC Symbol;Acc:HGNC:6158]
RHOC	65	ENSG00000155366	RHOC	0,082137979924812	0,13183976585254	0,7111415	0,01131476	6	0,466443495539272	6,03547997082227	7,625959641544e-09	1 x 1	1 p13	ras homolog family member C [Source:HGNC Symbol;Acc:HGNC:669]
POMC	66	ENSG00000115138	POMC	0,110458066576441	0,136602992549032	0,707613033333333	0,0110664456666667	11	0,635202373066447	9,4131721911568	1,11022302462516e-16	1 x 4	2 p23	proopiomelanocortin [Source:HGNC Symbol;Acc:HGNC:9201]
WNT5A	67	ENSG00000114251	WNT5A	0,103128575857143	0,162090922829005	0,70305755	0,013472585	14	0,137919837695188	1,5937959729457	0,0566958468981829	1 x 3	3 p14	wingless-type MMTV integration site family, member 5A [Source:HGNC Symbol;Acc:HGNC:12784]
HLA-F	68	ENSG00000137403	HLA-F	0,0423033129398496	0,0947401929104191	0,7025188	0,009479161	2	0,268726266540432	3,19316833181898	0,000881239122341837	1 x 1	NA	major histocompatibility complex, class I, F [Source:HGNC Symbol;Acc:HGNC:4963]
FANCE	69	ENSG00000112039	FANCE	0,0653540342857143	0,088105136195675	0,7003017	0,01685014	3	0,385833461583946	4,78670805035953	2,2534424287679e-06	1 x 1	6 p21	Fanconi anemia, complementation group E [Source:HGNC Symbol;Acc:HGNC:3586]
MCAM	70	ENSG00000076706	MCAM	0,0941887641729323	0,0827644570772131	0,68984745	0,013533595	2	0,713509801133522	11,6556744846808	0	1 x 3	11 q23	melanoma cell adhesion molecule [Source:HGNC Symbol;Acc:HGNC:6934]
LTA	71	ENSG00000238130	LTA	0,146882238646617	0,128742186496692	0,68962105	0,01124069	18	0,515295254270305	6,88183923702819	1,10181863632874e-10	5 x 1	NA	lymphotoxin alpha [Source:HGNC Symbol;Acc:HGNC:6709]
E2F5	72	ENSG00000133740	E2F5	0,138097643233083	0,124388584451326	0,6850264	0,01533512	14	0,49690343370112	6,5536776564094	5,87595194723178e-10	5 x 1	8 q21	E2F transcription factor 5, p130-binding [Source:HGNC Symbol;Acc:HGNC:3119]
MYCN	73	ENSG00000134323	MYCN	0,11725988424812	0,128021490436655	0,67499265	0,01360132	13	0,5149926642487	6,87633888855491	1,1335066218976e-10	1 x 4	2 p24	v-myc avian myelocytomatosis viral oncogene neuroblastoma derived homolog [Source:HGNC Symbol;Acc:HGNC:7559]
SH3BP2	74	ENSG00000087266	SH3BP2	0,168154952368421	0,114532736383832	0,66464225	0,053676665	25	0,468447437582243	6,06867953543583	6,49161102650453e-09	2 x 6	4 p16	SH3-domain binding protein 2 [Source:HGNC Symbol;Acc:HGNC:10825]
HFE	75	ENSG00000010704	HFE	0,050789367443609	0,0825205871779767	0,6643186	0,01638197	2	0,557263179452154	7,68143160194192	1,6242562850266e-12	1 x 1	6 p22	hemochromatosis [Source:HGNC Symbol;Acc:HGNC:4886]
ZNF215	76	ENSG00000149054	ZNF215	0,145493692481203	0,141151935391077	0,6616722	0,01578025	13	0,281653486167675	3,35968432490266	0,000511222253171684	1 x 5	11 p15	zinc finger protein 215 [Source:HGNC Symbol;Acc:HGNC:13007]
NFKB2	77	ENSG00000077150	NFKB2	0,0427739727067669	0,0551653372009513	0,6493402	0,01484677	1	0,389800423206104	4,8446876624739	1,76097965232103e-06	1 x 1	10 q24	nuclear factor of kappa light polypeptide gene enhancer in B-cells 2 (p49/p100) [Source:HGNC Symbol;Acc:HGNC:7795]
KLK10	78	ENSG00000129451	KLK10	0,0629463260902256	0,0581626821682495	0,649067	0,01920505	1	0,21561905846699	2,52732170127928	0,00634129145456774	1 x 1	19 q13	kallikrein-related peptidase 10 [Source:HGNC Symbol;Acc:HGNC:6358]
STK11	79	ENSG00000118046	STK11	0,174857476090226	0,0745703670119722	0,6476941	0,03018157	29	0,09922058312997	1,14126308519246	0,127921212021833	5 x 3	19 p13	serine/threonine kinase 11 [Source:HGNC Symbol;Acc:HGNC:11389]
PLXDC1	80	ENSG00000161381	PLXDC1	0,0972868246616541	0,118606352942704	0,6442313	0,01411031	9	0,412097357609379	5,17666965098915	4,14341224663772e-07	1 x 3	17 q12	plexin domain containing 1 [Source:HGNC Symbol;Acc:HGNC:20945]
DDB2	81	ENSG00000134574	DDB2	0,12941551037594	0,115726466153339	0,64311465	0,014591165	14	0,124396648763402	1,43493044343129	0,076845029680549	4 x 1	11 p11	damage-specific DNA binding protein 2, 48kDa [Source:HGNC Symbol;Acc:HGNC:2718]
THBS2	82	ENSG00000186340	THBS2	0,132333726015038	0,131542883397791	0,6383347	0,01680387	14	0,15258314452927	1,76708535496539	0,0397712978806405	1 x 5	6 q27	thrombospondin 2 [Source:HGNC Symbol;Acc:HGNC:11786]
LIF	83	ENSG00000128342	LIF	0,111599043045113	0,0986041190459856	0,6291289	0,01321663	8	0,674495963903984	10,456702724293	0	1 x 4	NA	leukemia inhibitory factor [Source:HGNC Symbol;Acc:HGNC:6596]
CDK6	84	ENSG00000105810	CDK6	0,0740167542857143	0,0800952319501434	0,62435885	0,01959026	4	-0,0641007293842863	-0,735178324707879	0,768227484696473	1 x 1	7 q21	cyclin-dependent kinase 6 [Source:HGNC Symbol;Acc:HGNC:1777]
EPHB1	85	ENSG00000154928	EPHB1	0,0712110194736842	0,0683861754218266	0,6243445	0,02354297	2	0,362850145408561	4,4567482507509	8,84113554755483e-06	1 x 1	3 q22	EPH receptor B1 [Source:HGNC Symbol;Acc:HGNC:3392]
TNFSF8	86	ENSG00000106952	TNFSF8	0,0812770803571429	0,0835520659427789	0,62170915	0,009906765	3	0,182515462981588	2,12467312600096	0,0177460922397754	1 x 1	9 q33	tumor necrosis factor (ligand) superfamily, member 8 [Source:HGNC Symbol;Acc:HGNC:11938]
COPG2	87	ENSG00000158623	COPG2	0,0819558305263158	0,0561724912854664	0,6185439	0,02368166	1	0,464694985713892	6,0066092552232	8,7691101047227e-09	1 x 1	7 q32	coatomer protein complex, subunit gamma 2 [Source:HGNC Symbol;Acc:HGNC:2237]
IGF2R	88	ENSG00000197081	IGF2R	0,0685271856390978	0,074729009123256	0,615662	0,01231851	3	0,422594445568242	5,33676893147857	2,0203258210838e-07	1 x 1	6 q25	insulin-like growth factor 2 receptor [Source:HGNC Symbol;Acc:HGNC:5467]
HLA-DRA	89	ENSG00000204287	HLA-DRA	0,0745897826315789	0,0603635129970429	0,6154481	0,025331315	2	0,266703430400117	3,16728358175978	0,000957365409184785	1 x 1	6 p21	major histocompatibility complex, class II, DR alpha [Source:HGNC Symbol;Acc:HGNC:4947]
NGFR	90	ENSG00000064300	NGFR	0,120733124586466	0,111720179407682	0,6144288	0,02186102	14	0,64664308982594	9,70272575774264	0	1 x 4	17 q21	nerve growth factor receptor [Source:HGNC Symbol;Acc:HGNC:7809]
RASSF1	91	ENSG00000068028	RASSF1	0,0279887231654135	0,0644378719768662	0,6118381	0,0090895355	2	0,127154701601369	1,4672619962073	0,0723507565862991	1 x 1	3 p21	Ras association (RalGDS/AF-6) domain family member 1 [Source:HGNC Symbol;Acc:HGNC:9882]
BSG	92	ENSG00000172270	BSG	0,0459686145112782	0,0527275288793972	0,6102877	0,01848331	1	0,3440105569869	4,19331659741408	2,51392424592822e-05	1 x 1	19 p13	basigin (Ok blood group) [Source:HGNC Symbol;Acc:HGNC:1116]
GPX1	93	ENSG00000233276	GPX1	0,0541692171353383	0,0742629838056576	0,60895285	0,01351076	3	0,23564721858679	2,7752607447398	0,00316165550984104	1 x 1	3 p21	glutathione peroxidase 1 [Source:HGNC Symbol;Acc:HGNC:4553]
ABL2	94	ENSG00000143322	ABL2	0,0870699709022556	0,0590344606523306	0,605288	0,02760744	2	0,0769598717119605	0,883466184611572	0,189301448239979	1 x 1	1 q25	ABL proto-oncogene 2, non-receptor tyrosine kinase [Source:HGNC Symbol;Acc:HGNC:77]
CTNNA1	95	ENSG00000044115	CTNNA1	0,052709525	0,0915458035043777	0,6036703	0,013268405	3	0,312472660736068	3,7649356205967	0,000125262524584557	1 x 1	5 q31	catenin (cadherin-associated protein), alpha 1, 102kDa [Source:HGNC Symbol;Acc:HGNC:2509]
TFRC	96	ENSG00000072274	TFRC	0,076796322406015	0,0638005938536567	0,5942125	0,03171564	3	0,541087937815961	7,36419115777849	8,84281536883691e-12	1 x 1	3 q29	transferrin receptor [Source:HGNC Symbol;Acc:HGNC:11763]
TNFRSF1B	97	ENSG00000028137	TNFRSF1B	0,0661046330451128	0,0900867958524097	0,59203495	0,013562055	4	0,515813443895072	6,89126680238915	1,04952935231495e-10	1 x 1	1 p36	tumor necrosis factor receptor superfamily, member 1B [Source:HGNC Symbol;Acc:HGNC:11917]
FGF9	98	ENSG00000102678	FGF9	0,171240587218045	0,0933121629354847	0,58886325	0,076025715	26	0,318978245929637	3,85209868453455	9,12252107028166e-05	5 x 3	NA	fibroblast growth factor 9 [Source:HGNC Symbol;Acc:HGNC:3687]
PTK2	99	ENSG00000169398	PTK2	0,0441161056390977	0,0493079891874998	0,577287	0,01623534	1	0,289360722736329	3,45989888222307	0,000364892080788604	1 x 1	8 q24	protein tyrosine kinase 2 [Source:HGNC Symbol;Acc:HGNC:9611]
HIF1A	100	ENSG00000100644	HIF1A	0,0666253265413534	0,0694856763565205	0,5769022	0,01943031	2	0,358906390002227	4,40110108861983	1,10637456602891e-05	1 x 1	14 q23	hypoxia inducible factor 1, alpha subunit (basic helix-loop-helix transcription factor) [Source:HGNC Symbol;Acc:HGNC:4910]
SEMA3F	101	ENSG00000001617	SEMA3F	0,123453065368421	0,124823656609927	0,5761259	0,015082935	17	0,437557851653061	5,56954265559931	6,95215076618183e-08	1 x 4	3 p21	sema domain, immunoglobulin domain (Ig), short basic domain, secreted, (semaphorin) 3F [Source:HGNC Symbol;Acc:HGNC:10728]
OSM	102	ENSG00000099985	OSM	0,0794322269548872	0,0742913836227015	0,57146565	0,011819355	4	0,360882660835292	4,4289525112328	9,89138220053309e-06	1 x 1	NA	oncostatin M [Source:HGNC Symbol;Acc:HGNC:8506]
FAS	103	ENSG00000026103	FAS	0,056653955075188	0,0655428617876916	0,5688878	0,01505275	2	0,356172967148658	4,36269102639976	1,29019816450526e-05	1 x 1	10 q23	Fas cell surface death receptor [Source:HGNC Symbol;Acc:HGNC:11920]
SEMA3B	104	ENSG00000012171	SEMA3B	0,117596591417293	0,0795362448407607	0,56082095	0,01681445	7	0,161238102118076	1,86992134850593	0,0318633651504285	4 x 1	3 p21	sema domain, immunoglobulin domain (Ig), short basic domain, secreted, (semaphorin) 3B [Source:HGNC Symbol;Acc:HGNC:10724]
HCK	105	ENSG00000101336	HCK	0,0678580133082707	0,0831121688086292	0,5586288	0,01329576	4	0,487078055405703	6,38324757410564	1,38079836453642e-09	1 x 1	NA	HCK proto-oncogene, Src family tyrosine kinase [Source:HGNC Symbol;Acc:HGNC:4840]
PCDH1	106	ENSG00000156453	PCDH1	0,078060283943609	0,0767964624397723	0,5567679	0,0127818095	3	0,521820113367283	7,00130746732882	5,937728086991e-11	1 x 2	5 q31	protocadherin 1 [Source:HGNC Symbol;Acc:HGNC:8655]
TUBB3	107	ENSG00000258947	TUBB3	0,0937929167669173	0,0744026376919716	0,5546388	0,0133083633333333	2	0,0725229184675755	0,832254278459829	0,203390023524159	2 x 1	16 q24	tubulin, beta 3 class III [Source:HGNC Symbol;Acc:HGNC:20772]
TYRO3	108	ENSG00000092445	TYRO3	0,0667083954022556	0,0705354074075314	0,53990665	0,009513144	2	0,348595211450775	4,25687389450631	1,96130016820728e-05	1 x 1	15 q15	TYRO3 protein tyrosine kinase [Source:HGNC Symbol;Acc:HGNC:12446]
AKT1	109	ENSG00000142208	AKT1	0,0488576054135338	0,0495691028382974	0,5394158	0,01288265	1	0,577312157306012	8,09240569803143	1,74416037168612e-13	1 x 1	14 q32	v-akt murine thymoma viral oncogene homolog 1 [Source:HGNC Symbol;Acc:HGNC:391]
RIPK3	110	ENSG00000129465	RIPK3	0,0697975455263158	0,0507546204165895	0,5386879	0,016622235	1	0,277765306597824	3,3093974591744	0,000603856165693695	1 x 1	14 q12	receptor-interacting serine-threonine kinase 3 [Source:HGNC Symbol;Acc:HGNC:10021]
VEGFB	111	ENSG00000173511	VEGFB	0,0321315999548872	0,0593342127898521	0,5341458	0,005636478	1	0,603151151985403	8,65489915164484	7,7715611723761e-15	1 x 1	11 q13	vascular endothelial growth factor B [Source:HGNC Symbol;Acc:HGNC:12681]
CDK10	112	ENSG00000185324	CDK10	0,141486714172932	0,104781984982635	0,53366285	0,01490953	18	0,422216631895243	5,33096204071599	2,07411584018935e-07	5 x 1	16 q24	cyclin-dependent kinase 10 [Source:HGNC Symbol;Acc:HGNC:1770]
JAG2	113	ENSG00000184916	JAG2	0,0429500021691729	0,0718067804257287	0,5336279	0,0102647435	2	0,331198001580225	4,01747558269895	4,93032713602126e-05	1 x 1	14 q32	jagged 2 [Source:HGNC Symbol;Acc:HGNC:6189]
MAP3K9	114	ENSG00000006432	MAP3K9	0,0499273543609023	0,0692438030699795	0,5299324	0,01110312	2	0,300767949016628	3,60957961203437	0,000217655067396239	1 x 1	14 q24	mitogen-activated protein kinase kinase kinase 9 [Source:HGNC Symbol;Acc:HGNC:6861]
GSTP1	115	ENSG00000084207	GSTP1	0,0604872548120301	0,07457818888566	0,513078566666667	0,01725185	4	0,377530246486515	4,66635420137184	3,73711412982036e-06	1 x 1	11 q13	glutathione S-transferase pi 1 [Source:HGNC Symbol;Acc:HGNC:4638]
ABCA1	116	ENSG00000165029	ABCA1	0,0405348725150376	0,0758580400095452	0,51189235	0,012473775	3	0,127040592167133	1,46592365641843	0,0725326610570409	1 x 1	9 q31	ATP-binding cassette, sub-family A (ABC1), member 1 [Source:HGNC Symbol;Acc:HGNC:29]
TERT	117	ENSG00000164362	TERT	0,0952111171052632	0,101483559926703	0,511064835	0,029990565	8	0,322757278627428	3,90300798469259	7,56266424610796e-05	1 x 2	5 p15	telomerase reverse transcriptase [Source:HGNC Symbol;Acc:HGNC:11730]
GPX3	118	ENSG00000211445	GPX3	0,150208909699248	0,103424107850361	0,5068142	0,02226354	23	0,430186900956212	5,4541894324537	1,18339085197761e-07	1 x 5	5 q33	glutathione peroxidase 3 (plasma) [Source:HGNC Symbol;Acc:HGNC:4555]
ERCC1	119	ENSG00000012061	ERCC1	0,0808546783458647	0,0705551289781173	0,5036332	0,012441875	4	0,25462709744363	3,01367305778919	0,00154974284818477	1 x 1	19 q13	excision repair cross-complementation group 1 [Source:HGNC Symbol;Acc:HGNC:3433]
FGFR1	120	ENSG00000077782	FGFR1	0,134753928714286	0,105816487931883	0,49831265	0,028556249	14	0,493125442558542	6,48775833121648	8,18733303376007e-10	1 x 5	8 p11	fibroblast growth factor receptor 1 [Source:HGNC Symbol;Acc:HGNC:3688]
ALPL	121	ENSG00000162551	ALPL	0,110389465293233	0,0808433344631209	0,49783705	0,011202135	7	0,569551378925883	7,93085713461193	4,21218615542784e-13	1 x 4	1 p36	alkaline phosphatase, liver/bone/kidney [Source:HGNC Symbol;Acc:HGNC:438]
EIF2AK2	122	ENSG00000055332	EIF2AK2	0,0510760448496241	0,0459771601270024	0,49219701	0,0147874	1	0,506779193911356	6,72835538732029	2,42157294216838e-10	1 x 1	2 p22	eukaryotic translation initiation factor 2-alpha kinase 2 [Source:HGNC Symbol;Acc:HGNC:9437]
CTNNB1	123	ENSG00000168036	CTNNB1	0,0903201244360902	0,0642857103542991	0,4906805	0,01541977	4	0,381275189769574	4,72047087696335	2,97984322839007e-06	1 x 2	3 p22	catenin (cadherin-associated protein), beta 1, 88kDa [Source:HGNC Symbol;Acc:HGNC:2514]
VIM	124	ENSG00000026025	VIM	0,0418924052819549	0,0794501891571291	0,48762085	0,0090971795	4	0,151128359288447	1,74984155640105	0,041243610614353	1 x 1	10 p13	vimentin [Source:HGNC Symbol;Acc:HGNC:12692]
SHB	125	ENSG00000107338	SHB	0,0546387056729323	0,0875734554284267	0,48455475	0,0089034355	4	0,557066380929829	7,67749798196145	1,65911728799983e-12	1 x 1	9 p13	Src homology 2 domain containing adaptor protein B [Source:HGNC Symbol;Acc:HGNC:10838]
TP73	126	ENSG00000078900	TP73	0,0830595179022556	0,0808846596418488	0,48294711	0,012017282	4	0,490472913741561	6,44176673570011	1,03097563819432e-09	1 x 2	1 p36	tumor protein p73 [Source:HGNC Symbol;Acc:HGNC:12003]
LMO1	127	ENSG00000166407	LMO1	0,143803623947368	0,142131670978026	0,47970335	0,01247033	28	0,533006872543876	7,21009789013969	1,99440464143663e-11	1 x 5	11 p15	LIM domain only 1 (rhombotin 1) [Source:HGNC Symbol;Acc:HGNC:6641]
CCNC	128	ENSG00000112237	CCNC	0,0336671349699248	0,0566703375104097	0,4793183	0,006217058	2	0,300608866444774	3,60748070956772	0,000219261187757391	1 x 1	6 q16	cyclin C [Source:HGNC Symbol;Acc:HGNC:1581]
BMPR2	129	ENSG00000204217	BMPR2	0,0689832719548872	0,0824124195069895	0,47890135	0,016111165	5	0,512849701289447	6,83748483653246	1,38447697750621e-10	1 x 1	2 q33	bone morphogenetic protein receptor, type II (serine/threonine kinase) [Source:HGNC Symbol;Acc:HGNC:1078]
MLLT6	130	ENSG00000275023	MLLT6	0,0361810447669173	0,0496499007221873	0,4784281	0,008275284	2	0,0896754103926013	1,03053396077745	0,152329160762779	1 x 1	17 q12	myeloid/lymphoid or mixed-lineage leukemia (trithorax homolog, Drosophila); translocated to, 6 [Source:HGNC Symbol;Acc:HGNC:7138]
MAPK14	131	ENSG00000112062	MAPK14	0,107732412255639	0,0778128669749214	0,4781732	0,01821713	6	0,545964404309681	7,45856502347789	5,35615996000161e-12	2 x 3	6 p21	mitogen-activated protein kinase 14 [Source:HGNC Symbol;Acc:HGNC:6876]
ERGIC3	132	ENSG00000125991	ERGIC3	0,0471332269924812	0,049201267200255	0,4709289	0,01558293	1	0,19540365727242	2,28045768746721	0,0120978466927533	1 x 1	NA	ERGIC and golgi 3 [Source:HGNC Symbol;Acc:HGNC:15927]
IFNGR2	133	ENSG00000262795	IFNGR2	0,135663146240601	0,0872613236831982	0,46929168	0,016545075	18	0,66806414853701	10,2759115843856	0	4 x 1	NA	interferon gamma receptor 2 (interferon gamma transducer 1) [Source:HGNC Symbol;Acc:HGNC:5440]
PLAU	134	ENSG00000122861	PLAU	0,0412995582706767	0,0427336315545539	0,4691541	0,01469211	1	0,474397293239366	6,16796344604562	3,99965438546701e-09	1 x 1	10 q22	plasminogen activator, urokinase [Source:HGNC Symbol;Acc:HGNC:9052]
CD44	135	ENSG00000026508	CD44	0,0598143307744361	0,0802361966006329	0,46845275	0,010514705	3	0,295278093556058	3,53733735071062	0,000279841469803532	1 x 1	11 p13	CD44 molecule (Indian blood group) [Source:HGNC Symbol;Acc:HGNC:1681]
EGR4	136	ENSG00000135625	EGR4	0,149852201203008	0,07711865563244	0,467338	0,04135571	14	0,256942318714248	3,04300277679648	0,00141546516078472	2 x 5	2 p13	early growth response 4 [Source:HGNC Symbol;Acc:HGNC:3241]
HDAC1	137	ENSG00000116478	HDAC1	0,0867766668421053	0,0813886381141896	0,4672398	0,01286796	5	0,312550647488898	3,76597698738522	0,000124792623147574	2 x 1	1 p35	histone deacetylase 1 [Source:HGNC Symbol;Acc:HGNC:4852]
PTK6	138	ENSG00000101213	PTK6	0,12060885906015	0,096765949263866	0,4648948	0,009743835	13	0,580590282085286	8,16162265911102	1,19348975147204e-13	4 x 1	NA	protein tyrosine kinase 6 [Source:HGNC Symbol;Acc:HGNC:9617]
NQO1	139	ENSG00000181019	NQO1	0,0702955608195489	0,0812566478135471	0,46428615	0,015969515	5	0,340953052129923	4,15111980058296	2,9602174681842e-05	1 x 1	16 q22	NAD(P)H dehydrogenase, quinone 1 [Source:HGNC Symbol;Acc:HGNC:2874]
TRAF4	140	ENSG00000076604	TRAF4	0,125042175037594	0,0681405678857687	0,4640658	0,01596294	5	0,263776127668398	3,12990470342049	0,00107812214344394	4 x 1	17 q11	TNF receptor-associated factor 4 [Source:HGNC Symbol;Acc:HGNC:12034]
NEU1	141	ENSG00000228691	NEU1	0,0491532023308271	0,0482339063673498	0,4637296	0,01341757	2	0,28268123512567	3,37300637014655	0,000489011593129307	1 x 1	NA	sialidase 1 (lysosomal sialidase) [Source:HGNC Symbol;Acc:HGNC:7758]
CASP10	142	ENSG00000003400	CASP10	0,0976276775438596	0,0752611144795802	0,463403506666667	0,01243466	5	0,247319067922305	2,92145372194551	0,00205219741247786	3 x 1	2 q33	caspase 10, apoptosis-related cysteine peptidase [Source:HGNC Symbol;Acc:HGNC:1500]
UNG	143	ENSG00000076248	UNG	0,0363526918796993	0,0481935282695408	0,4607393	0,01110732	1	0,622627922427788	9,10688572641212	6,66133814775094e-16	1 x 1	12 q24	uracil-DNA glycosylase [Source:HGNC Symbol;Acc:HGNC:12572]
PTPN6	144	ENSG00000111679	PTPN6	0,12394920056391	0,0862729592689735	0,45677499	0,016058645	9	0,462191766604242	5,96543286100069	1,06957241952088e-08	4 x 1	12 p13	protein tyrosine phosphatase, non-receptor type 6 [Source:HGNC Symbol;Acc:HGNC:9658]
IGFBP6	145	ENSG00000167779	IGFBP6	0,154019790676692	0,0817112596468466	0,45663095	0,022435115	21	0,616540799570363	8,9628174880452	1,33226762955019e-15	5 x 1	12 q13	insulin-like growth factor binding protein 6 [Source:HGNC Symbol;Acc:HGNC:5475]
EPHB6	146	ENSG00000106123	EPHB6	0,0789809054586466	0,0945800263581551	0,4518314	0,0115298895	6	0,456241685458302	5,86828132939204	1,70403964272481e-08	1 x 2	7 q34	EPH receptor B6 [Source:HGNC Symbol;Acc:HGNC:3396]
AREG	147	ENSG00000109321	AREG	0,105241454172932	0,0705675782480901	0,448071	0,03159086	5	0,263797745386104	3,13018039875539	0,00107718194862194	1 x 3	4 q13	amphiregulin [Source:HGNC Symbol;Acc:HGNC:651]
DDR1	148	ENSG00000215522	DDR1	0,137981061616541	0,0970585499666552	0,44787625	0,015004815	17	0,519931364305218	6,96655402498272	7,11093406380314e-11	5 x 1	NA	discoidin domain receptor tyrosine kinase 1 [Source:HGNC Symbol;Acc:HGNC:2730]
TNFSF10	149	ENSG00000121858	TNFSF10	0,0673944744736842	0,0439747422233941	0,42986634	0,011364365	1	0,366598387763964	4,50989223320756	7,12438706540475e-06	1 x 1	3 q26	tumor necrosis factor (ligand) superfamily, member 10 [Source:HGNC Symbol;Acc:HGNC:11925]
FANCG	150	ENSG00000221829	FANCG	0,0377702496240601	0,0366290801523615	0,4294738	0,01739374	1	0,373957926663379	4,61498095961442	4,62616593399634e-06	1 x 1	9 p13	Fanconi anemia, complementation group G [Source:HGNC Symbol;Acc:HGNC:3588]
ETV6	151	ENSG00000139083	ETV6	0,154584668195489	0,0575748531218545	0,4207886	0,03621923	18	0,152732261467842	1,76885352393258	0,0396228017442471	4 x 4	12 p13	ets variant 6 [Source:HGNC Symbol;Acc:HGNC:3495]
IL6	152	ENSG00000136244	IL6	0,0834526121428571	0,0717417053341626	0,412243366666667	0,0130571523333333	3	0,348374781700889	4,25381016760041	1,9850242328312e-05	1 x 1	7 p15	interleukin 6 [Source:HGNC Symbol;Acc:HGNC:6018]
DNMT3B	153	ENSG00000088305	DNMT3B	0,0822478139097744	0,0639754246795631	0,412139	0,01419928	3	0,319510192429016	3,8592523532338	8,88619511544286e-05	2 x 1	NA	DNA (cytosine-5-)-methyltransferase 3 beta [Source:HGNC Symbol;Acc:HGNC:2979]
MAP2K6	154	ENSG00000108984	MAP2K6	0,110853625601504	0,0830260426252614	0,405920375	0,029184545	10	0,482747565837563	6,30915008911387	1,99519445409635e-09	3 x 2	17 q24	mitogen-activated protein kinase kinase 6 [Source:HGNC Symbol;Acc:HGNC:6846]
EPHA1	155	ENSG00000146904	EPHA1	0,0367050133345865	0,0434121049929816	0,40049241	0,010820481	1	0,477312440808019	6,21700394129376	3,14410386614838e-09	1 x 1	7 q35	EPH receptor A1 [Source:HGNC Symbol;Acc:HGNC:3385]
ID1	156	ENSG00000125968	ID1	0,0962354330827068	0,0539544453714342	0,39923575	0,01776295	2	0,644809946701312	9,65559667526933	0	2 x 2	NA	inhibitor of DNA binding 1, dominant negative helix-loop-helix protein [Source:HGNC Symbol;Acc:HGNC:5360]
BCL2L2	157	ENSG00000129473	BCL2L2	0,113246444699248	0,0822524509948927	0,39581982	0,01658987	11	0,16042574500871	1,86025070821734	0,0325462505265506	3 x 1	14 q11	BCL2-like 2 [Source:HGNC Symbol;Acc:HGNC:995]
IL12A	158	ENSG00000168811	IL12A	0,0302718115488722	0,0450091596112427	0,3947008	0,008304794	1	0,466285990402344	6,03287561340162	7,72276409488626e-09	1 x 1	3 q25	interleukin 12A [Source:HGNC Symbol;Acc:HGNC:5969]
ST6GAL1	159	ENSG00000073849	ST6GAL1	0,0482025403383459	0,0378904470458919	0,39122525	0,0170187	1	0,654365849641848	9,904491245424	0	1 x 1	3 q27	ST6 beta-galactosamide alpha-2,6-sialyltranferase 1 [Source:HGNC Symbol;Acc:HGNC:10860]
CDKN1A	160	ENSG00000124762	CDKN1A	0,0341802374135338	0,0400712304701224	0,38778302	0,0107211	1	0,0779069668206702	0,894404414606676	0,18637294045939	1 x 1	6 p21	cyclin-dependent kinase inhibitor 1A (p21, Cip1) [Source:HGNC Symbol;Acc:HGNC:1784]
CDKN1B	161	ENSG00000111276	CDKN1B	0,0301525886616541	0,0461738585275775	0,3845078	0,007760814	1	0,483022700926245	6,31383973272505	1,94937299635711e-09	1 x 1	12 p13	cyclin-dependent kinase inhibitor 1B (p27, Kip1) [Source:HGNC Symbol;Acc:HGNC:1785]
PYCARD	162	ENSG00000103490	PYCARD	0,0782034142105263	0,0584137417398209	0,38384705	0,019730075	2	0,24442533296099	2,88508589349879	0,00228855231340452	1 x 1	16 p11	PYD and CARD domain containing [Source:HGNC Symbol;Acc:HGNC:16608]
CLK1	163	ENSG00000013441	CLK1	0,0999825245864662	0,0729611203024816	0,3737378	0,01378035	6	0,504312586760897	6,68440053184924	3,02973424126662e-10	3 x 1	2 q33	CDC-like kinase 1 [Source:HGNC Symbol;Acc:HGNC:2068]
DAB2IP	164	ENSG00000136848	DAB2IP	0,114029023132832	0,0599235701200867	0,372857066666667	0,0337829866666667	5	0,549026797520989	7,51838146058745	3,8933301027555e-12	1 x 4	9 q33	DAB2 interacting protein [Source:HGNC Symbol;Acc:HGNC:17294]
GFI1	165	ENSG00000162676	GFI1	0,088178554160401	0,0617765004372667	0,372767133333333	0,0162617366666667	3	0,507730708503683	6,74537061635162	2,21999862937139e-10	2 x 1	1 p22	growth factor independent 1 transcription repressor [Source:HGNC Symbol;Acc:HGNC:4237]
CCND3	166	ENSG00000112576	CCND3	0,0597389245864662	0,0363378932670247	0,3664384	0,02112378	1	0,471480887771277	6,11916380691949	5,07714981168306e-09	1 x 1	6 p21	cyclin D3 [Source:HGNC Symbol;Acc:HGNC:1585]
PURA	167	ENSG00000185129	PURA	0,030369205037594	0,0336986304966705	0,3644263	0,01307055	1	0,562288912086428	7,78252847119529	9,41469124882133e-13	1 x 1	5 q31	purine-rich element binding protein A [Source:HGNC Symbol;Acc:HGNC:9701]
PPARD	168	ENSG00000112033	PPARD	0,0891475221804511	0,0658439119987295	0,3560961	0,01449257	2	0,320916108073211	3,87817883449827	8,28870586726538e-05	2 x 1	6 p21	peroxisome proliferator-activated receptor delta [Source:HGNC Symbol;Acc:HGNC:9235]
MLH3	169	ENSG00000119684	MLH3	0,0546314911315789	0,0393311123426206	0,34271565	0,02163632	2	0,478247299203852	6,23278683386941	2,90916990497436e-09	1 x 1	14 q24	mutL homolog 3 [Source:HGNC Symbol;Acc:HGNC:7128]
IRF7	170	ENSG00000276561	IRF7	0,0845541923233083	0,0370266913580945	0,33829101	0,016923502	1	0,502930171943115	6,65986208542512	3,43243433675866e-10	1 x 1	NA	interferon regulatory factor 7 [Source:HGNC Symbol;Acc:HGNC:6122]
CTSH	171	ENSG00000103811	CTSH	0,0664929390977444	0,0319725347027031	0,3374133	0,02992542	1	0,323977585450216	3,91949168918186	7,11454862770688e-05	1 x 1	15 q25	cathepsin H [Source:HGNC Symbol;Acc:HGNC:2535]
FYN	172	ENSG00000010810	FYN	0,0513300163157895	0,0454683051900316	0,3351823	0,01190161	1	0,219152456871623	2,57080927707663	0,0056316789564741	1 x 1	6 q21	FYN proto-oncogene, Src family tyrosine kinase [Source:HGNC Symbol;Acc:HGNC:4037]
CEACAM1	173	ENSG00000079385	CEACAM1	0,0846494945037594	0,0433253955091397	0,334628235	0,01324507	1	0,386036153196693	4,78966290081864	2,22540102001734e-06	1 x 1	19 q13	carcinoembryonic antigen-related cell adhesion molecule 1 (biliary glycoprotein) [Source:HGNC Symbol;Acc:HGNC:1814]
NFKB1	174	ENSG00000109320	NFKB1	0,102834221691729	0,056441366375305	0,3271485	0,03285006	3	0,29294828669576	3,5067955213009	0,000310873670483547	3 x 1	4 q24	nuclear factor of kappa light polypeptide gene enhancer in B-cells 1 [Source:HGNC Symbol;Acc:HGNC:7794]
NOTCH1	175	ENSG00000148400	NOTCH1	0,0548051663909774	0,0478455983949937	0,32460179	0,017128245	1	0,760111531348541	13,3886931655314	0	1 x 1	9 q34	notch 1 [Source:HGNC Symbol;Acc:HGNC:7881]
NRAS	176	ENSG00000213281	NRAS	0,0432643503759398	0,0310152386826576	0,31137785	0,020436215	0	0,353883598877091	4,33061959662088	1,46587618765626e-05	1 x 1	1 p13	neuroblastoma RAS viral (v-ras) oncogene homolog [Source:HGNC Symbol;Acc:HGNC:7989]
MAP3K1	177	ENSG00000095015	MAP3K1	0,0733309432330827	0,0410093170817098	0,30313995	0,02203111	2	0,394003124779379	4,90645983473381	1,35136210666076e-06	1 x 1	5 q11	mitogen-activated protein kinase kinase kinase 1, E3 ubiquitin protein ligase [Source:HGNC Symbol;Acc:HGNC:6848]
IFNGR1	178	ENSG00000027697	IFNGR1	0,0558482956390977	0,0325542462327569	0,3013567	0,0144437	0	0,586615825255524	8,29042144203596	5,88418203051333e-14	1 x 1	6 q23	interferon gamma receptor 1 [Source:HGNC Symbol;Acc:HGNC:5439]
TYK2	179	ENSG00000105397	TYK2	0,069454497443609	0,0530508389866876	0,3009912	0,01015665	1	0,304747523700628	3,66219377719423	0,000180843072930981	1 x 1	19 p13	tyrosine kinase 2 [Source:HGNC Symbol;Acc:HGNC:12440]
MYB	180	ENSG00000118513	MYB	0,0569455370676692	0,0357714477548883	0,29407	0,01908722	0	0,363649147574993	4,46805575584942	8,44538433453224e-06	1 x 1	6 q23	v-myb avian myeloblastosis viral oncogene homolog [Source:HGNC Symbol;Acc:HGNC:7545]
CREB1	181	ENSG00000118260	CREB1	0,0507154506015038	0,0311809855428409	0,2931943	0,01555589	0	0,516566180095905	6,90497990398026	9,77818936931385e-11	1 x 1	2 q33	cAMP responsive element binding protein 1 [Source:HGNC Symbol;Acc:HGNC:2345]
CASP6	182	ENSG00000138794	CASP6	0,0310576405526316	0,0288392717909103	0,29291256	0,0086509245	0	0,601923171155199	8,62725070278706	9,10382880192628e-15	1 x 1	4 q25	caspase 6, apoptosis-related cysteine peptidase [Source:HGNC Symbol;Acc:HGNC:1507]
TSG101	183	ENSG00000074319	TSG101	0,0869590320300752	0,0387353523621596	0,28573667	0,018520875	2	0,589583520559096	8,35462406639443	4,13002965160558e-14	1 x 1	11 p15	tumor susceptibility 101 [Source:HGNC Symbol;Acc:HGNC:15971]
JUNB	184	ENSG00000171223	JUNB	0,0797390122556391	0,0480437601266758	0,2820891	0,02616056	1	0,324258334354393	3,92328708741799	7,0150122305046e-05	1 x 1	19 p13	jun B proto-oncogene [Source:HGNC Symbol;Acc:HGNC:6205]
IRF5	185	ENSG00000128604	IRF5	0,122966213646617	0,0491146375927212	0,2817688	0,032722255	1	0,368593805447252	4,53828719691542	6,34386957298894e-06	3 x 3	7 q32	interferon regulatory factor 5 [Source:HGNC Symbol;Acc:HGNC:6120]
VAV1	186	ENSG00000141968	VAV1	0,0790093449586466	0,0436305538549251	0,277812845	0,018803325	0	0,20432003607176	2,38894657455777	0,00916128496604762	1 x 1	19 p13	vav 1 guanine nucleotide exchange factor [Source:HGNC Symbol;Acc:HGNC:12657]
TMEM63A	187	ENSG00000196187	TMEM63A	0,0419977145112782	0,0239347842035571	0,2743058	0,01741229	0	0,172929032911818	2,00953837674194	0,0232672567315884	1 x 1	1 q42	transmembrane protein 63A [Source:HGNC Symbol;Acc:HGNC:29118]
SMAD2	188	ENSG00000175387	SMAD2	0,0530488939849624	0,036257272556199	0,27143293	0,012614445	0	0,375431616928033	4,63614480598401	4,23758406031816e-06	1 x 1	NA	SMAD family member 2 [Source:HGNC Symbol;Acc:HGNC:6768]
DNMT1	189	ENSG00000130816	DNMT1	0,059896592481203	0,0311223396445368	0,2678191	0,02215863	0	0,383226470805934	4,74877550005271	2,64527096671685e-06	1 x 1	19 p13	DNA (cytosine-5-)-methyltransferase 1 [Source:HGNC Symbol;Acc:HGNC:2976]
BIRC5	190	ENSG00000089685	BIRC5	0,0385859793233083	0,0334886447524936	0,2650045	0,01114449	0	0,139956237022031	1,61779519099243	0,0540560528068375	1 x 1	17 q25	baculoviral IAP repeat containing 5 [Source:HGNC Symbol;Acc:HGNC:593]
MTA1	191	ENSG00000182979	MTA1	0,0530723639097744	0,0327503779023473	0,260325	0,01252687	0	0,572999597730585	8,00223897946894	2,8554936193359e-13	1 x 1	14 q32	metastasis associated 1 [Source:HGNC Symbol;Acc:HGNC:7410]
HDAC9	192	ENSG00000048052	HDAC9	0,0782985718796992	0,0357357680087906	0,25711265	0,03327372	0	0,324814950324146	3,93081531401083	6,82149210660121e-05	1 x 1	7 p21	histone deacetylase 9 [Source:HGNC Symbol;Acc:HGNC:14065]
LYN	193	ENSG00000254087	LYN	0,107040925300752	0,039997283648767	0,2503715	0,036443895	0	0,183378469074287	2,13506816866356	0,0173084310451704	3 x 1	8 q12	LYN proto-oncogene, Src family tyrosine kinase [Source:HGNC Symbol;Acc:HGNC:6735]
CASP8	194	ENSG00000064012	CASP8	0,116593987142857	0,0427164504699409	0,2452878	0,01165891	1	0,272882806930915	3,24649997854394	0,000741808623746398	4 x 1	2 q33	caspase 8, apoptosis-related cysteine peptidase [Source:HGNC Symbol;Acc:HGNC:1509]
ITPR2	195	ENSG00000123104	ITPR2	0,0585752815037594	0,0298707820966347	0,2384773	0,02279434	0	0,674098364715312	10,4454021608821	0	1 x 1	12 p11	inositol 1,4,5-trisphosphate receptor, type 2 [Source:HGNC Symbol;Acc:HGNC:6181]
MAPK12	196	ENSG00000188130	MAPK12	0,0471040956503759	0,0249583014751093	0,23344628	0,0091715225	0	0,326096847325834	3,94817034893215	6,39456030328001e-05	1 x 1	NA	mitogen-activated protein kinase 12 [Source:HGNC Symbol;Acc:HGNC:6874]
FANCF	197	ENSG00000183161	FANCF	0,0327862127067669	0,0229004522166931	0,2315327	0,01239463	0	0,509989574565211	6,78589775148839	1,8041856897355e-10	1 x 1	11 p14	Fanconi anemia, complementation group F [Source:HGNC Symbol;Acc:HGNC:3587]
COMT	198	ENSG00000093010	COMT	0,0523461984210526	0,0259191928250168	0,2218789	0,01890704	0	0,42682205160809	5,40197852831166	1,50237251861363e-07	1 x 1	NA	catechol-O-methyltransferase [Source:HGNC Symbol;Acc:HGNC:2228]
PSIP1	199	ENSG00000164985	PSIP1	0,0336423892481203	0,0269361696435601	0,210834	0,01220724	0	0,312166647954461	3,76085020864488	0,000127122265252244	1 x 1	9 p22	PC4 and SFRS1 interacting protein 1 [Source:HGNC Symbol;Acc:HGNC:9527]
MYBL2	200	ENSG00000101057	MYBL2	0,0359283753421053	0,0202932243379471	0,203868535	0,0108571435	0	0,437348987587757	5,56625511611958	7,05895923935884e-08	1 x 1	NA	v-myb avian myeloblastosis viral oncogene homolog-like 2 [Source:HGNC Symbol;Acc:HGNC:7548]
PPP2R1B	201	ENSG00000137713	PPP2R1B	0,0292485242105263	0,0235631522452141	0,2030366	0,009086697	0	0,335901926498246	4,08173442468989	3,86335793008952e-05	1 x 1	11 q23	protein phosphatase 2, regulatory subunit A, beta [Source:HGNC Symbol;Acc:HGNC:9303]
RIPK2	202	ENSG00000104312	RIPK2	0,0673724477443609	0,0270248546135167	0,2026127	0,02055173	0	0,438433316620332	5,58333469889542	6,52103411269422e-08	1 x 1	8 q21	receptor-interacting serine-threonine kinase 2 [Source:HGNC Symbol;Acc:HGNC:10020]
CASP2	203	ENSG00000106144	CASP2	0,042359594887218	0,0220532156585055	0,2012863	0,01698768	0	0,422374895860096	5,33339410186329	2,05141935660791e-07	1 x 1	7 q34	caspase 2, apoptosis-related cysteine peptidase [Source:HGNC Symbol;Acc:HGNC:1503]
ARNT	204	ENSG00000143437	ARNT	0,0378626617293233	0,0218376950598549	0,1935925	0,01620973	0	0,439840538375596	5,60554528580647	5,88115099953157e-08	1 x 1	1 q21	aryl hydrocarbon receptor nuclear translocator [Source:HGNC Symbol;Acc:HGNC:700]
CDK2	205	ENSG00000123374	CDK2	0,0328440704511278	0,0203314974742936	0,1929715	0,01067599	0	0,2463465435708	2,90922202306067	0,00212906790030831	1 x 1	12 q13	cyclin-dependent kinase 2 [Source:HGNC Symbol;Acc:HGNC:1771]
NR2F6	206	ENSG00000160113	NR2F6	0,0726246215037594	0,0321052062024478	0,1926994	0,02237596	0	0,358954869781421	4,40178349457663	1,10334851005645e-05	1 x 1	19 p13	nuclear receptor subfamily 2, group F, member 6 [Source:HGNC Symbol;Acc:HGNC:7977]
ITGB1	207	ENSG00000150093	ITGB1	0,0832471320300752	0,0406907550718369	0,1898051	0,01473912	0	0,215051278533493	2,52034347046742	0,00646233102860216	1 x 1	10 p11	integrin, beta 1 (fibronectin receptor, beta polypeptide, antigen CD29 includes MDF2, MSK12) [Source:HGNC Symbol;Acc:HGNC:6153]
EXT1	208	ENSG00000182197	EXT1	0,0789805769924812	0,0304489287618984	0,189599	0,02813462	0	0,353155170282536	4,32043385373461	1,52632911439854e-05	1 x 1	8 q24	exostosin glycosyltransferase 1 [Source:HGNC Symbol;Acc:HGNC:3512]
MCM2	209	ENSG00000073111	MCM2	0,0677313771804511	0,028310821871331	0,187353715	0,01244409	0	0,232919927184656	2,74128700365671	0,00348765241669979	1 x 1	3 q21	minichromosome maintenance complex component 2 [Source:HGNC Symbol;Acc:HGNC:6944]
TK1	210	ENSG00000167900	TK1	0,0723098735526316	0,026864769956861	0,18651433	0,025652362	0	0,49308484164992	6,48705256805491	8,21639201120661e-10	1 x 1	17 q25	thymidine kinase 1, soluble [Source:HGNC Symbol;Acc:HGNC:11830]
BCL3	211	ENSG00000069399	BCL3	0,0914824614285714	0,029545099112381	0,18552771	0,037538695	0	0,161871731127807	1,87746704218844	0,0313388824914849	2 x 1	19 q13	B-cell CLL/lymphoma 3 [Source:HGNC Symbol;Acc:HGNC:998]
CTTN	212	ENSG00000085733	CTTN	0,0539311228571429	0,0267257619516873	0,1803493	0,02073245	0	0,451457443426454	5,79088778219285	2,46231193212765e-08	1 x 1	11 q13	cortactin [Source:HGNC Symbol;Acc:HGNC:3338]
MCM6	213	ENSG00000076003	MCM6	0,0427892743609023	0,0191002415060354	0,1800584	0,01198136	0	0,369907420732086	4,55701963748215	5,87485122471865e-06	1 x 1	2 q21	minichromosome maintenance complex component 6 [Source:HGNC Symbol;Acc:HGNC:6949]
CSTB	214	ENSG00000160213	CSTB	0,0323954873458647	0,0202312682792919	0,1764277	0,008937467	0	0,663158127300135	10,1408167886153	0	1 x 1	NA	cystatin B (stefin B) [Source:HGNC Symbol;Acc:HGNC:2482]
NOTCH2	215	ENSG00000134250	NOTCH2	0,0169816685263158	0,0193800414255176	0,1741347	0,005855622	0	0,701238033866725	11,2578618529936	0	1 x 1	1 p12	notch 2 [Source:HGNC Symbol;Acc:HGNC:7882]
ICAM1	216	ENSG00000090339	ICAM1	0,0323080960902256	0,0199187639412156	0,17313592	0,010368633	0	0,539558397295262	7,33480786324296	1,03316244448592e-11	1 x 1	19 p13	intercellular adhesion molecule 1 [Source:HGNC Symbol;Acc:HGNC:5344]
CSK	217	ENSG00000103653	CSK	0,0572872783458647	0,0299738466009968	0,1722114	0,01671409	0	0,407358961457749	5,10522186148981	5,68506831277737e-07	1 x 1	15 q24	c-src tyrosine kinase [Source:HGNC Symbol;Acc:HGNC:2444]
ITPR3	218	ENSG00000096433	ITPR3	0,0387723977067669	0,0177644474894472	0,16742603	0,014582735	0	0,569151087968421	7,92261107576037	4,40536496171262e-13	1 x 1	6 p21	inositol 1,4,5-trisphosphate receptor, type 3 [Source:HGNC Symbol;Acc:HGNC:6182]
MALT1	219	ENSG00000172175	MALT1	0,0378012536842105	0,0210918806616313	0,1672933	0,01075809	0	0,446013593691327	5,70358609193925	3,71783314134788e-08	1 x 1	NA	mucosa associated lymphoid tissue lymphoma translocation gene 1 [Source:HGNC Symbol;Acc:HGNC:6819]
CAPG	220	ENSG00000042493	CAPG	0,0559449987218045	0,0297015180240464	0,1620462	0,01211755	0	0,281278539200144	3,35482726014722	0,000519552341297969	1 x 1	2 p11	capping protein (actin filament), gelsolin-like [Source:HGNC Symbol;Acc:HGNC:1474]
HDAC11	221	ENSG00000163517	HDAC11	0,0448639315037594	0,021214670255999	0,1619688	0,02207515	0	0,67607281320259	10,5016848070044	0	1 x 1	3 p25	histone deacetylase 11 [Source:HGNC Symbol;Acc:HGNC:19086]
TNFRSF10B	222	ENSG00000120889	TNFRSF10B	0,0481044965789474	0,0192106435717997	0,1610937	0,02049732	0	0,469156625737857	6,08045743105093	6,13045114672417e-09	1 x 1	8 p21	tumor necrosis factor receptor superfamily, member 10b [Source:HGNC Symbol;Acc:HGNC:11905]
ETS1	223	ENSG00000134954	ETS1	0,0747056107142857	0,0315929052847178	0,15829765	0,02743612	0	0,317870839608346	3,83721916430506	9,63335675718824e-05	1 x 1	11 q24	v-ets avian erythroblastosis virus E26 oncogene homolog 1 [Source:HGNC Symbol;Acc:HGNC:3488]
TNFRSF10A	224	ENSG00000104689	TNFRSF10A	0,0463476309398496	0,0212412199794644	0,15387599	0,019156625	0	0,397774327585066	4,96219967144609	1,0622904942359e-06	1 x 1	8 p21	tumor necrosis factor receptor superfamily, member 10a [Source:HGNC Symbol;Acc:HGNC:11904]
VAV2	225	ENSG00000160293	VAV2	0,0421900182706767	0,0198234385775733	0,15139032	0,020434275	0	0,638142948940381	9,48656975719608	0	1 x 1	9 q34	vav 2 guanine nucleotide exchange factor [Source:HGNC Symbol;Acc:HGNC:12658]
PTGS1	226	ENSG00000095303	PTGS1	0,0473330273383459	0,0222299041163917	0,13944216	0,012999665	0	0,430741277349597	5,46281809156365	1,13747931185237e-07	1 x 1	9 q33	prostaglandin-endoperoxide synthase 1 (prostaglandin G/H synthase and cyclooxygenase) [Source:HGNC Symbol;Acc:HGNC:9604]
MLLT3	227	ENSG00000171843	MLLT3	0,0231806857142857	0,016288572093072	0,1305058	0,01031244	0	0,426278461451416	5,39356973621913	1,5610509895847e-07	1 x 1	9 p21	myeloid/lymphoid or mixed-lineage leukemia (trithorax homolog, Drosophila); translocated to, 3 [Source:HGNC Symbol;Acc:HGNC:7136]
FLI1	228	ENSG00000151702	FLI1	0,0552272427067669	0,0222576662167159	0,1239714	0,01926793	0	0,392056835807085	4,87780803679336	1,5283295087265e-06	1 x 1	11 q24	Fli-1 proto-oncogene, ETS transcription factor [Source:HGNC Symbol;Acc:HGNC:3749]
JAK2	229	ENSG00000096968	JAK2	0,0403373682706767	0,0191259444860877	0,1233179	0,01090338	0	0,514009180052214	6,85848567884942	1,24269039503133e-10	1 x 1	9 p24	Janus kinase 2 [Source:HGNC Symbol;Acc:HGNC:6192]
PTK2B	230	ENSG00000120899	PTK2B	0,0376979193233083	0,0156142409921714	0,1227516	0,01557511	0	0,58446332465802	8,24417374855193	7,58282325818982e-14	1 x 1	8 p21	protein tyrosine kinase 2 beta [Source:HGNC Symbol;Acc:HGNC:9612]
SMAD4	231	ENSG00000141646	SMAD4	0,0203284923458647	0,0141010518490455	0,1214292	0,009023407	0	0,513187914292111	6,84360539708146	1,34158129050377e-10	1 x 1	NA	SMAD family member 4 [Source:HGNC Symbol;Acc:HGNC:6770]
CCNE1	232	ENSG00000105173	CCNE1	0,0538859468421053	0,0199291909362486	0,1119537	0,01947373	0	0,259342625048242	3,07346960730437	0,00128742500396484	1 x 1	19 q12	cyclin E1 [Source:HGNC Symbol;Acc:HGNC:1589]
WNT2B	233	ENSG00000134245	WNT2B	0,0445089217669173	0,0199751489580541	0,110932605	0,016866385	0	0,333688911845961	4,05146072367958	4,33515558493358e-05	1 x 1	1 p13	wingless-type MMTV integration site family, member 2B [Source:HGNC Symbol;Acc:HGNC:12781]
CPNE1	234	ENSG00000214078	CPNE1	0,030312964962406	0,0149650735127408	0,1081984	0,01055832	0	0,319059585106299	3,85319227902086	9,08601050257918e-05	1 x 1	NA	copine I [Source:HGNC Symbol;Acc:HGNC:2314]
PRKAR1A	235	ENSG00000108946	PRKAR1A	0,0345593482706767	0,0174346621654184	0,1070263	0,01100215	0	0,384285469091918	4,7641681250562	2,47890463644929e-06	1 x 1	17 q24	protein kinase, cAMP-dependent, regulatory, type I, alpha [Source:HGNC Symbol;Acc:HGNC:9388]
MLH1	236	ENSG00000076242	MLH1	0,0221046299849624	0,0123571593450716	0,1001847	0,008391339	0	0,455779600197396	5,86077849485468	1,76614853852897e-08	1 x 1	3 p22	mutL homolog 1 [Source:HGNC Symbol;Acc:HGNC:7127]
EPM2A	237	ENSG00000112425	EPM2A	0,0499647621052632	0,0162133000379126	0,09510096	0,02365882	0	0,52359206075342	7,03404034415264	5,00861574437295e-11	1 x 1	6 q24	epilepsy, progressive myoclonus type 2A, Lafora disease (laforin) [Source:HGNC Symbol;Acc:HGNC:3413]
PTEN	238	ENSG00000171862	PTEN	0,0196037308947368	0,0116497870047696	0,09309766	0,008622649	0	0,58195309428224	8,19057368570853	1,01807451358127e-13	1 x 1	10 q23	phosphatase and tensin homolog [Source:HGNC Symbol;Acc:HGNC:9588]
TESK2	239	ENSG00000070759	TESK2	0,0233703579699248	0,0108680067156703	0,08306611	0,01077174	0	0,60473141104828	8,69062172189232	6,43929354282591e-15	1 x 1	1 p34	testis-specific kinase 2 [Source:HGNC Symbol;Acc:HGNC:11732]
HSD17B12	240	ENSG00000149084	HSD17B12	0,0314333868345865	0,0143984676880923	0,080166195	0,0119151205	0	0,615763542735423	8,94461048752727	1,55431223447522e-15	1 x 1	11 p11	hydroxysteroid (17-beta) dehydrogenase 12 [Source:HGNC Symbol;Acc:HGNC:18646]
CDC25B	241	ENSG00000101224	CDC25B	0,0324239136842105	0,0130135283552556	0,074538795	0,015074805	0	0,522276474200146	7,00972578641607	5,68365354780553e-11	1 x 1	NA	cell division cycle 25B [Source:HGNC Symbol;Acc:HGNC:1726]
CASP3	242	ENSG00000164305	CASP3	0,028671587443609	0,0131674182879227	0,06642368	0,01149725	0	0,52753753006232	7,10737788854985	3,41683348281663e-11	1 x 1	4 q35	caspase 3, apoptosis-related cysteine peptidase [Source:HGNC Symbol;Acc:HGNC:1504]
ODC1	243	ENSG00000115758	ODC1	0,0227616945037594	0,010192702801983	0,06232706	0,007889795	0	0,465163357232546	6,01433400302668	8,447722299465e-09	1 x 1	2 p25	ornithine decarboxylase 1 [Source:HGNC Symbol;Acc:HGNC:8109]
RRAS	244	ENSG00000126458	RRAS	0,025286974924812	0,0106863382383839	0,05973395	0,009912865	0	0,414418640806005	5,21185497436682	3,54230333732275e-07	1 x 1	19 q13	related RAS viral (r-ras) oncogene homolog [Source:HGNC Symbol;Acc:HGNC:10447]
LIG4	245	ENSG00000174405	LIG4	0,0228085498270677	0,0106734395906195	0,05965632	0,009822957	0	0,576577377073695	8,07697189565422	1,89848137210902e-13	1 x 1	NA	ligase IV, DNA, ATP-dependent [Source:HGNC Symbol;Acc:HGNC:6601]
RASA1	246	ENSG00000145715	RASA1	0,0189596033684211	0,00990434814116448	0,05025028	0,006690532	0	0,491036141954563	6,4515125950098	9,81891901119525e-10	1 x 1	5 q14	RAS p21 protein activator (GTPase activating protein) 1 [Source:HGNC Symbol;Acc:HGNC:9871]
SMARCA4	247	ENSG00000127616	SMARCA4	0,0186653837669173	0,00812545569824355	0,04841846	0,007205038	0	0,502107983602848	6,64530037284086	3,69591468540875e-10	1 x 1	19 p13	SWI/SNF related, matrix associated, actin dependent regulator of chromatin, subfamily a, member 4 [Source:HGNC Symbol;Acc:HGNC:11100]
ERBB2	248	ENSG00000141736	ERBB2	0,0178714684135338	0,00662354689659702	0,03864019	0,007806909	0	0,554365677931319	7,62370472119047	2,21511697873211e-12	1 x 1	17 q12	v-erb-b2 avian erythroblastic leukemia viral oncogene homolog 2 [Source:HGNC Symbol;Acc:HGNC:3430]
